# Supplementary material for: Synthesis of Thiazolo[5,4-f]quinazolin-9(8H)-ones as Multi-Target Directed Ligands of Ser/Thr Kinases
Source: PubMed Central journal article supplement (PMC6273584; doi:10.3390/molecules21050578), 2016-04-30
Supplement: molecules-21-00578-s001.pdf [file molecules-21-00578-s001.pdf]

# Supplementary Materials: Synthesis of Thiazolo[5,4-f]quinazolin-9(8H)-ones as Multi-Target Directed Ligands of Ser/Thr Kinases

Damien Hédou, Julien Godeau, Nadège Loaëc, Laurent Meijer, Corinne Fruit and Thierry Besson

$^1\text{H}$ - and  $^{13}\text{C}$ -NMR spectra of compounds 10, 11a–n, 12a–n, 13a–g, 14a–e and 15a–c

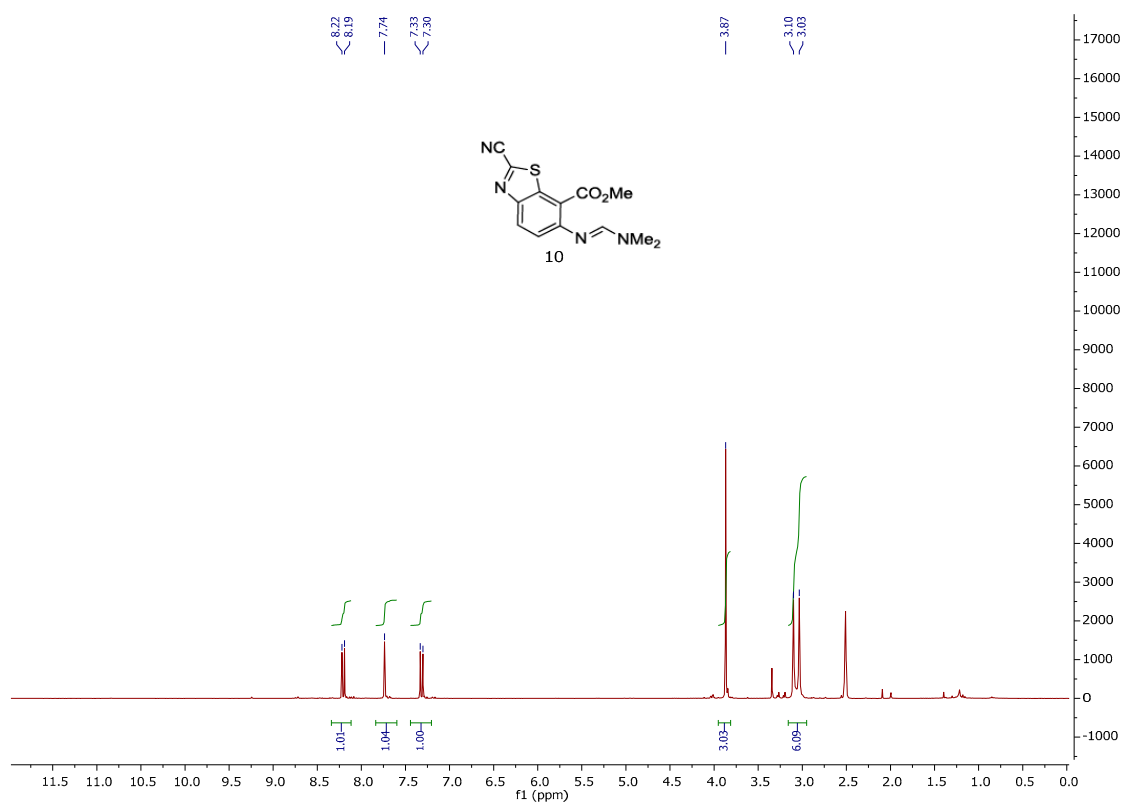

Figure S1.  $^1\text{H}$ -NMR Compound 10.

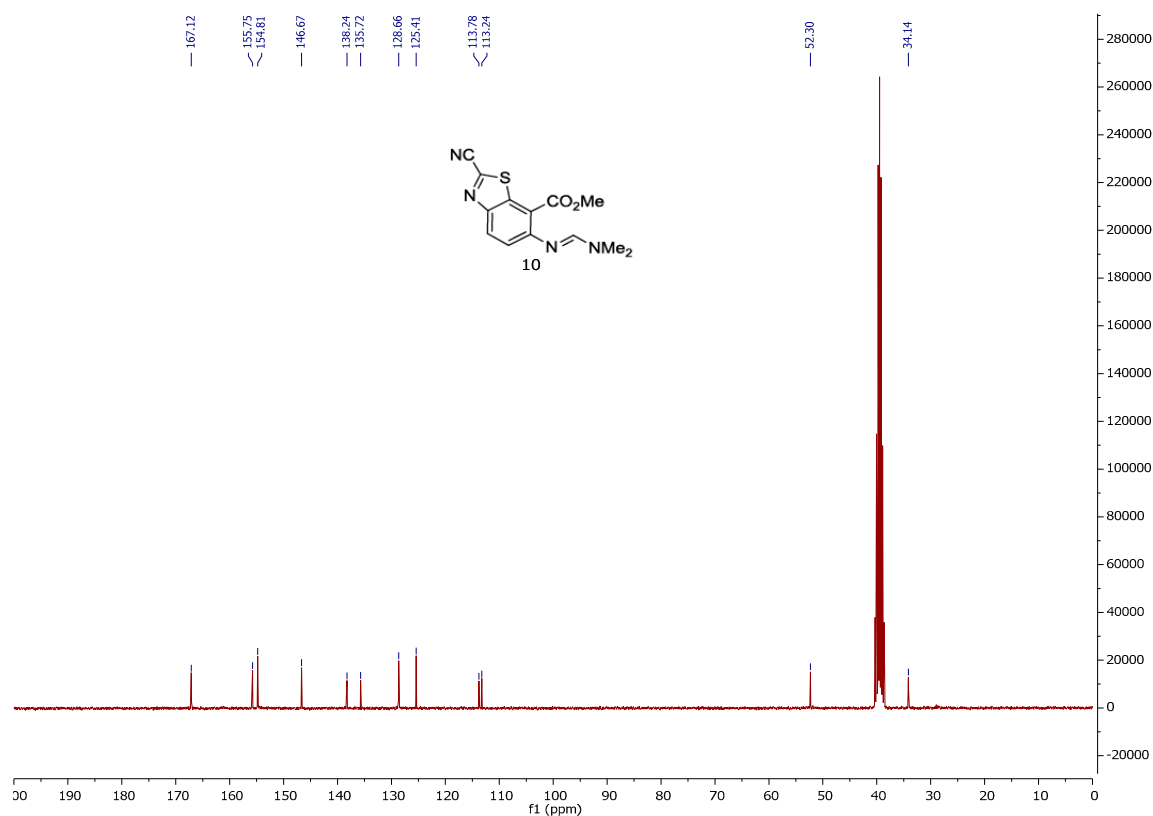Figure S2. <sup>13</sup>C-NMR Compound 10.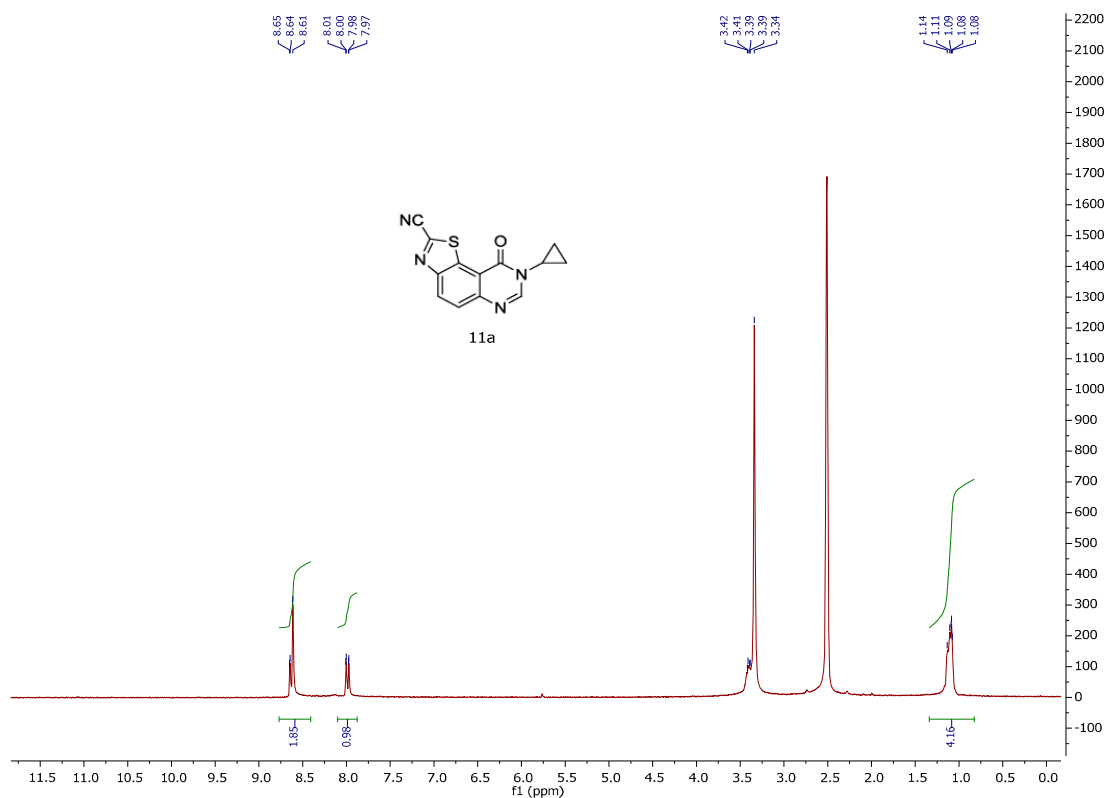Figure S3. <sup>1</sup>H-NMR Compound 11a.

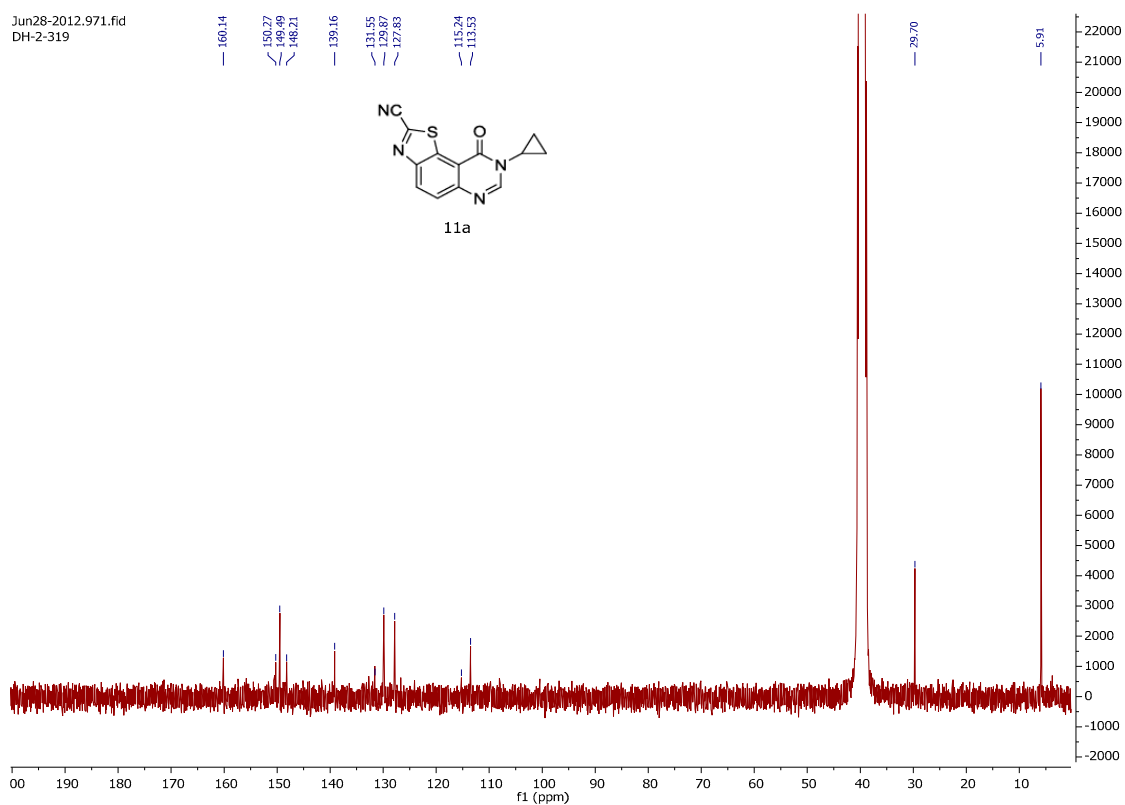Figure S4. <sup>13</sup>C-NMR Compound 11a.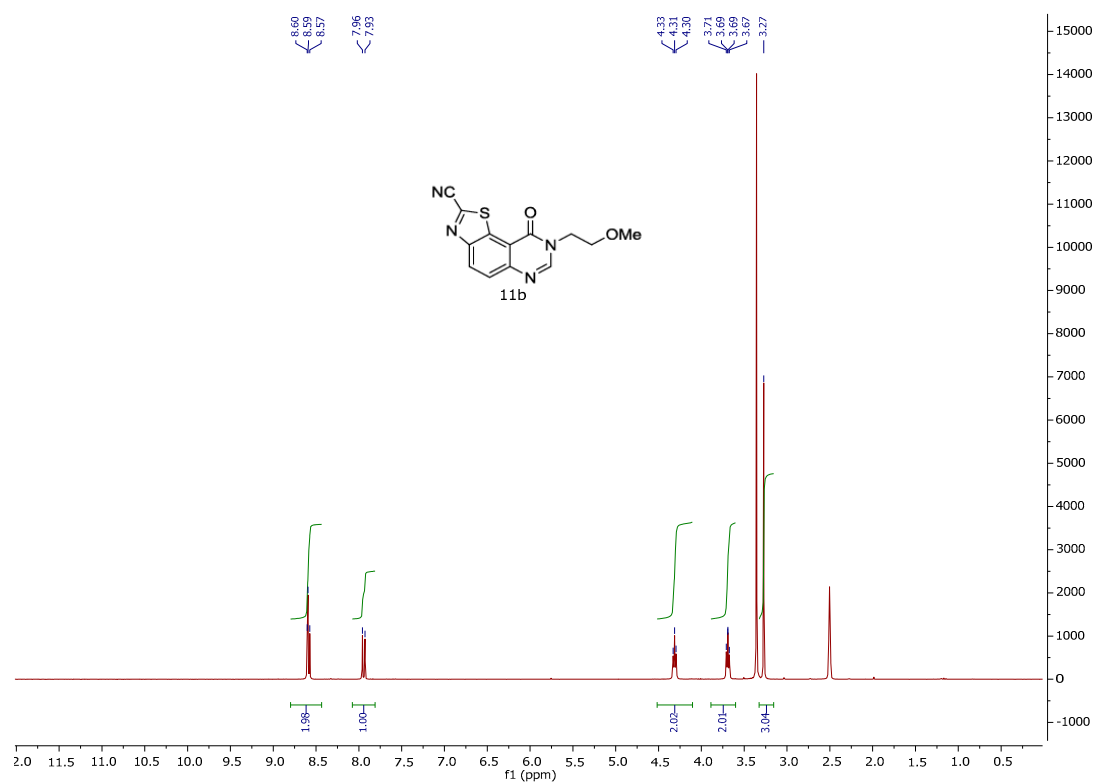Figure S5. <sup>1</sup>H-NMR Compound 11b.

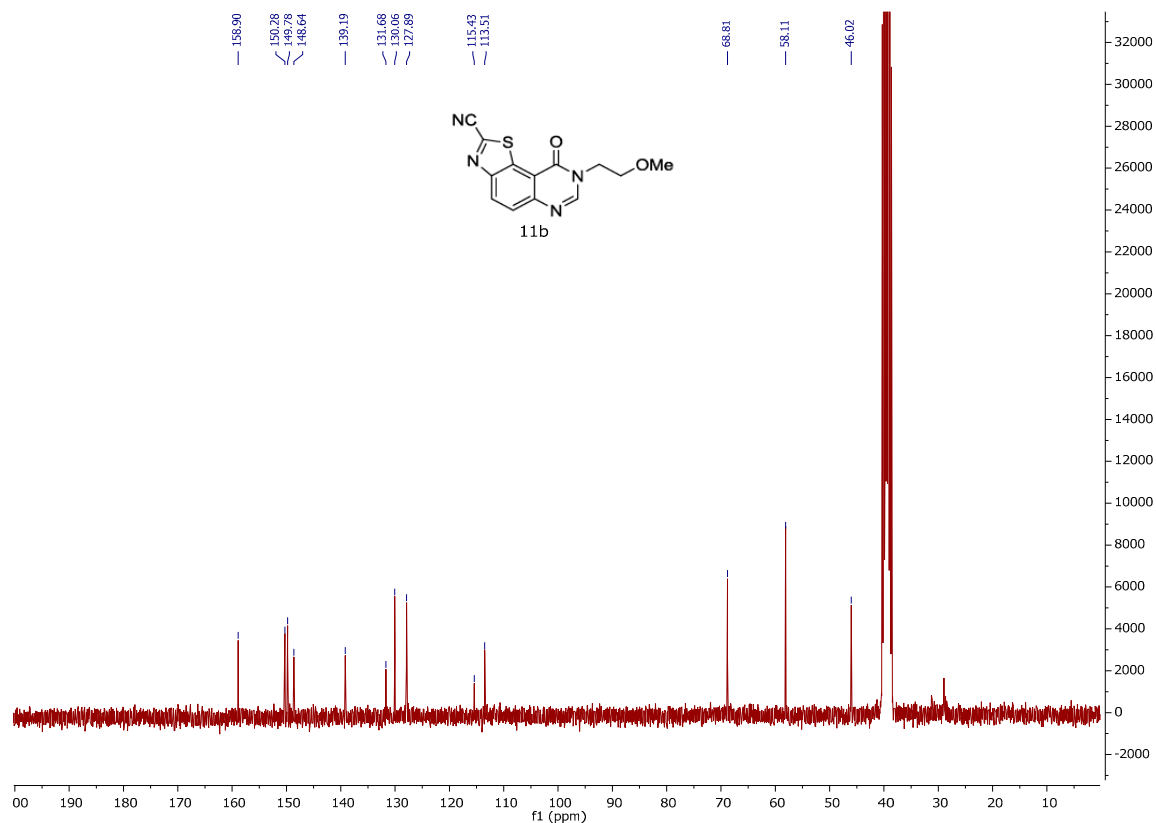Figure S6. <sup>13</sup>C-NMR Compound 11b.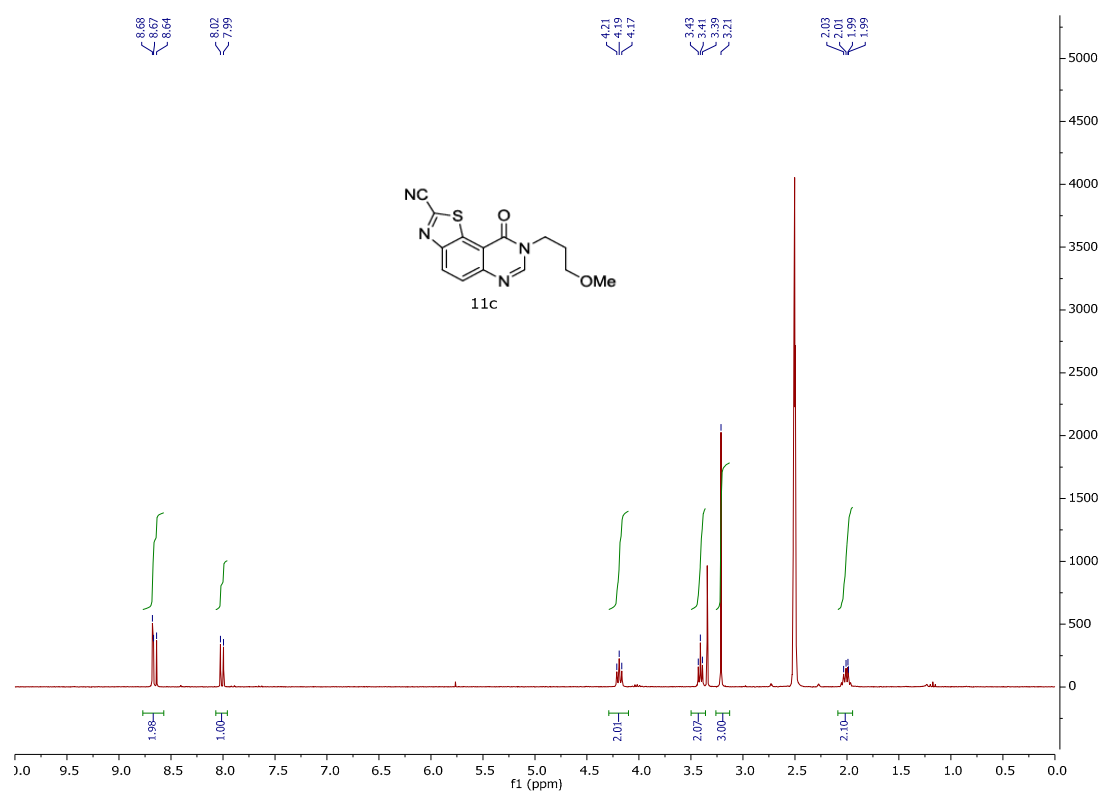Figure S7. <sup>1</sup>H-NMR Compound 11c.

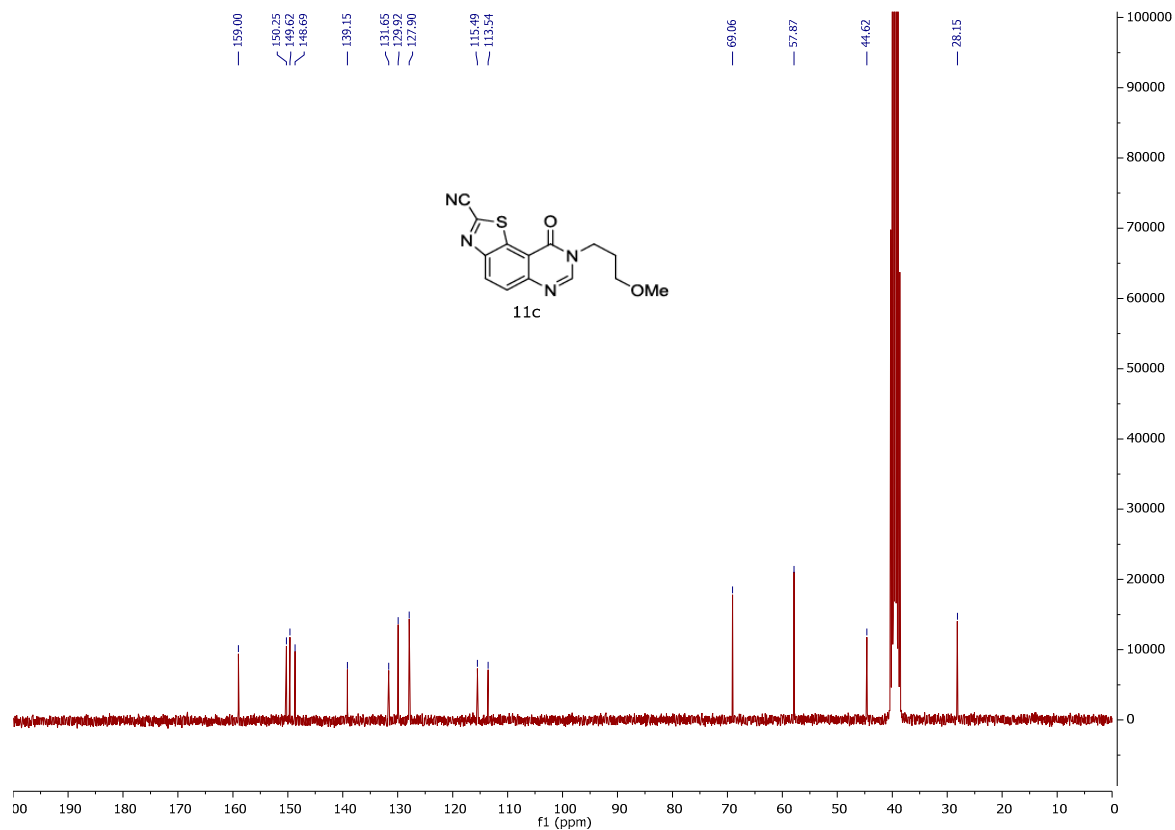Figure S8. <sup>13</sup>C-NMR Compound 11c.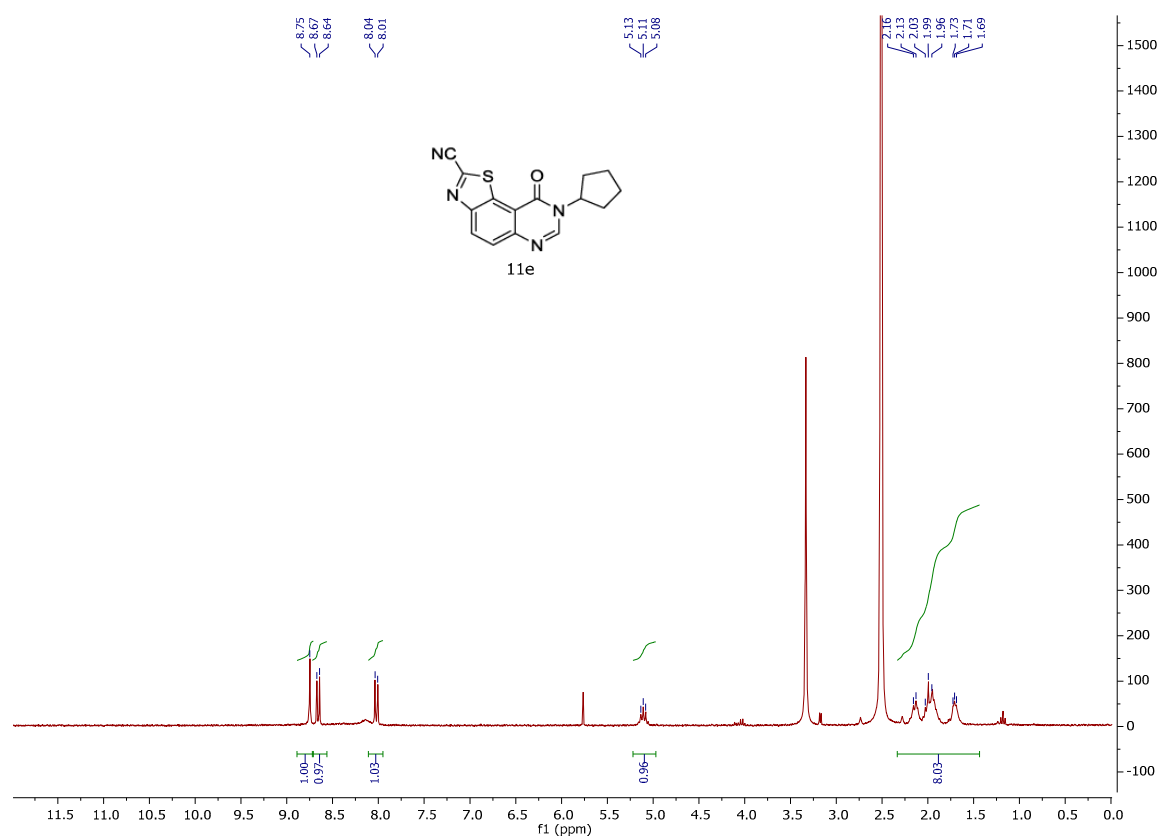Figure S9. <sup>1</sup>H-NMR Compound 11e.

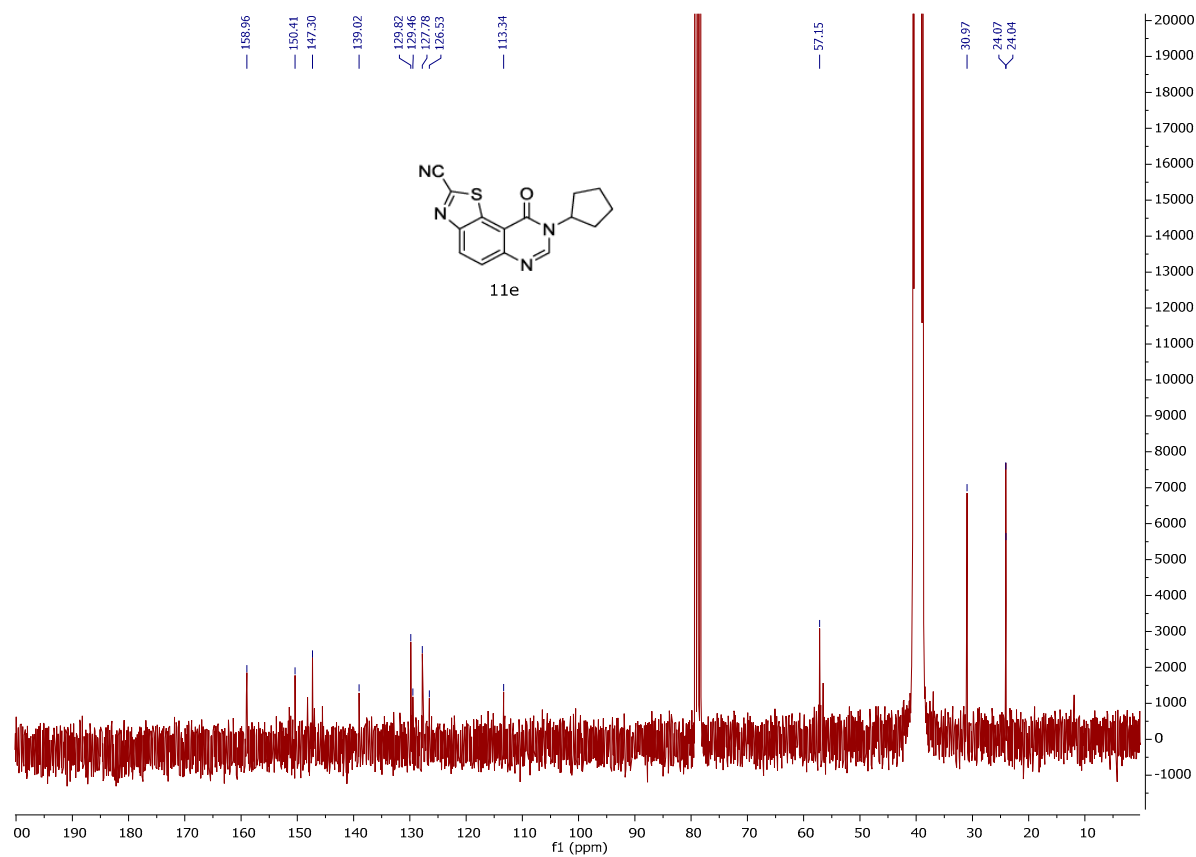Figure S10. <sup>13</sup>C-NMR Compound 11e.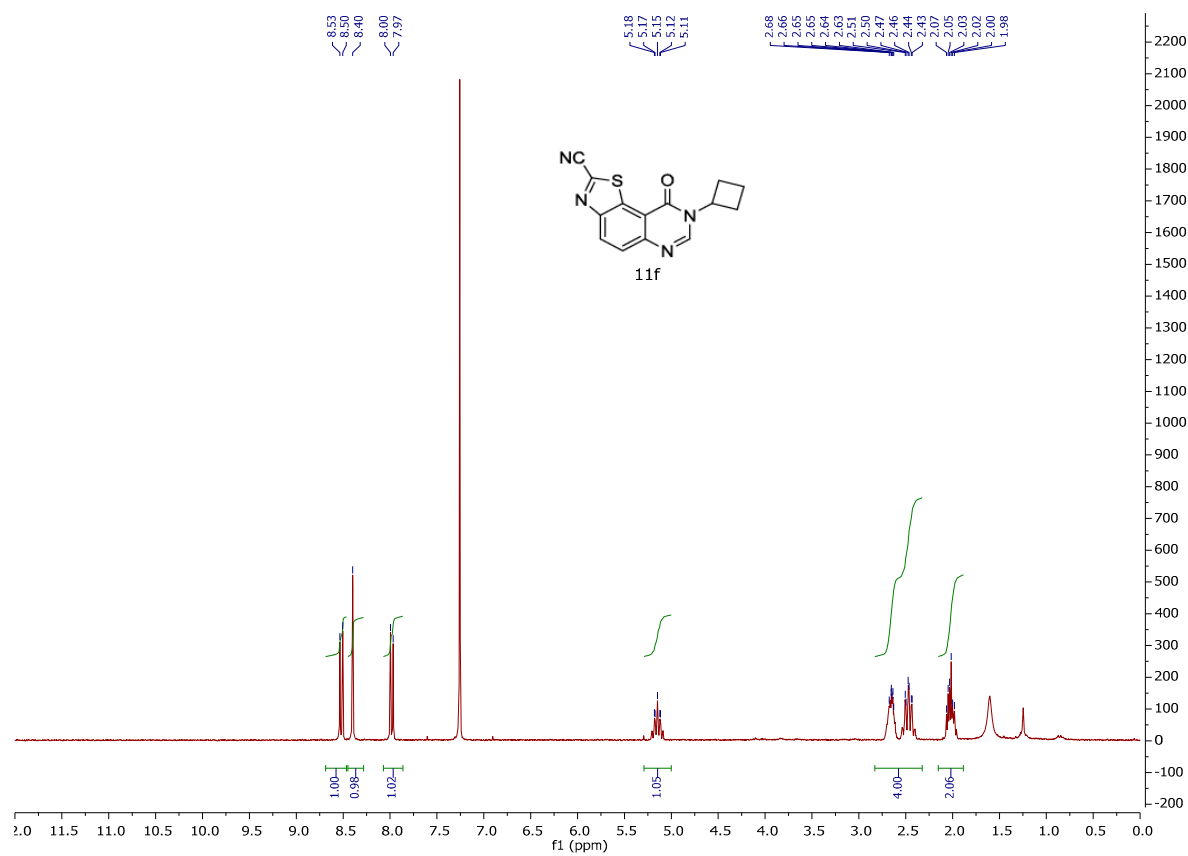Figure S11. <sup>1</sup>H-NMR Compound 11f.

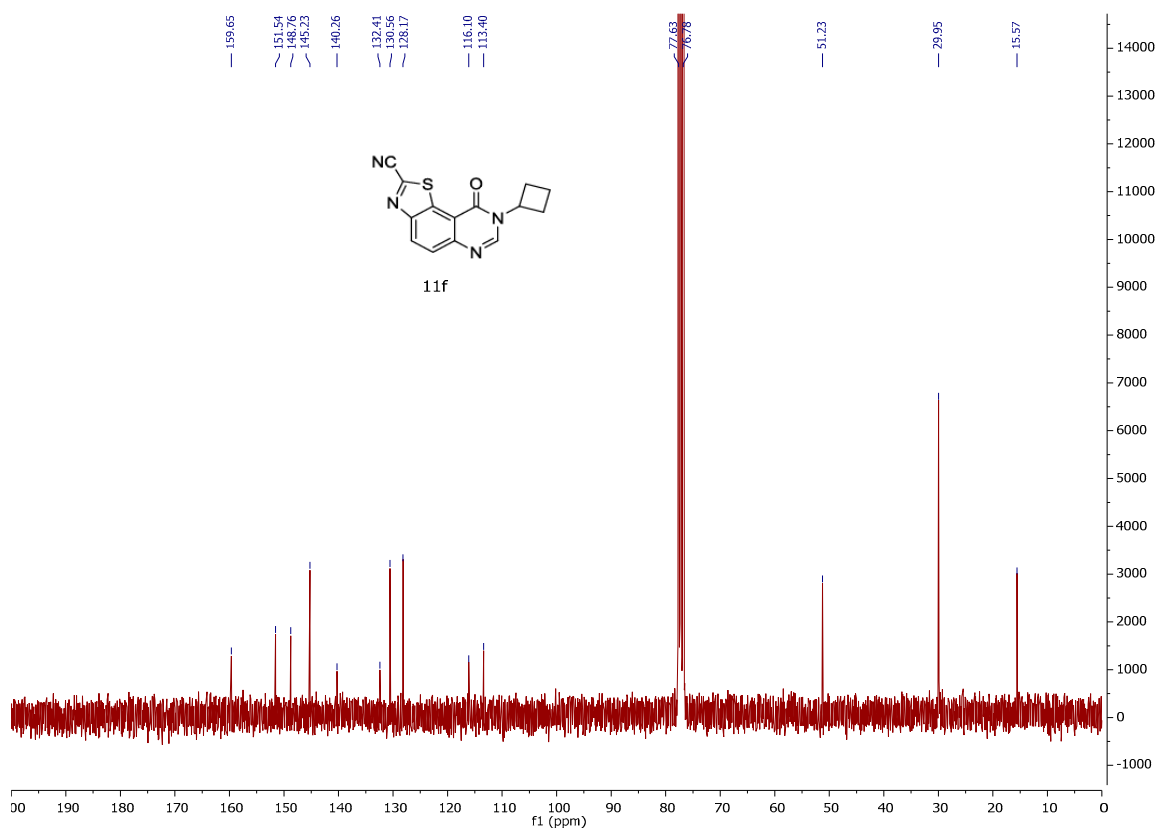Figure S12. <sup>13</sup>C-NMR Compound 11f.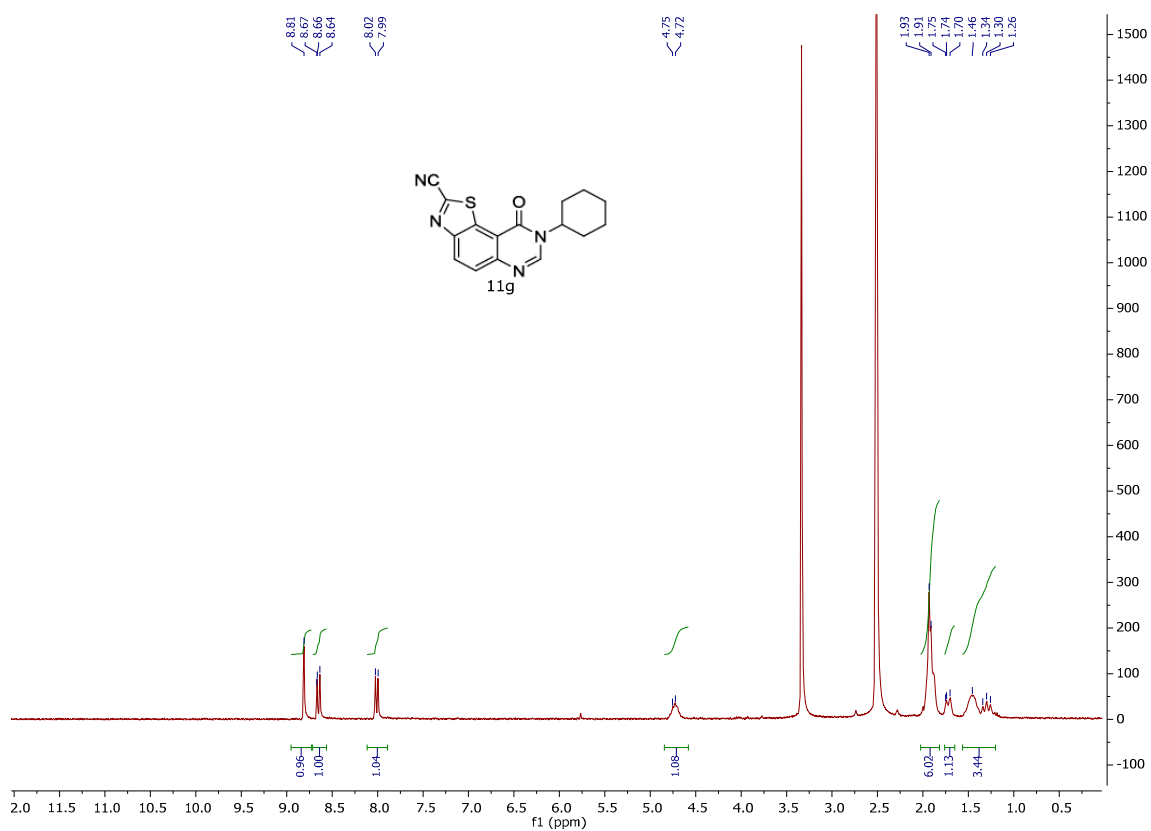Figure 13 <sup>1</sup>H-NMR Compound 11g.

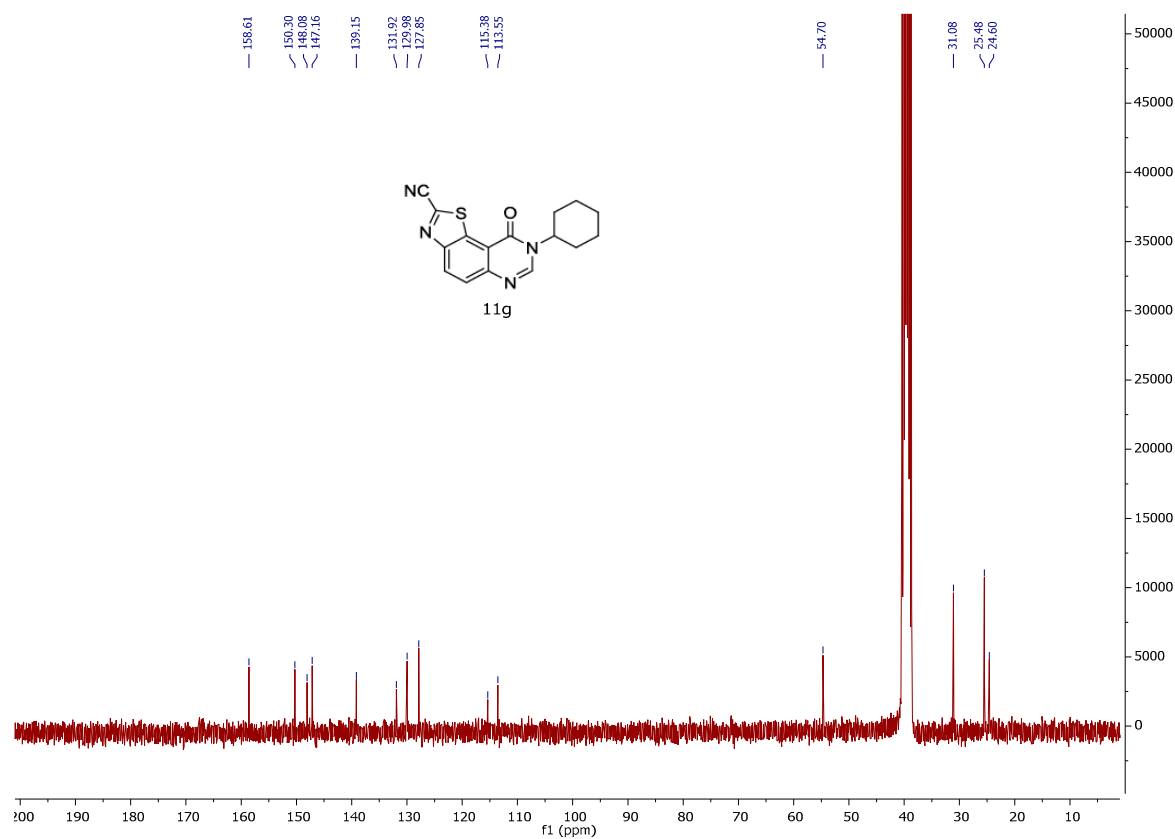

**Figure S14.** <sup>13</sup>C-NMR Compound 11h.

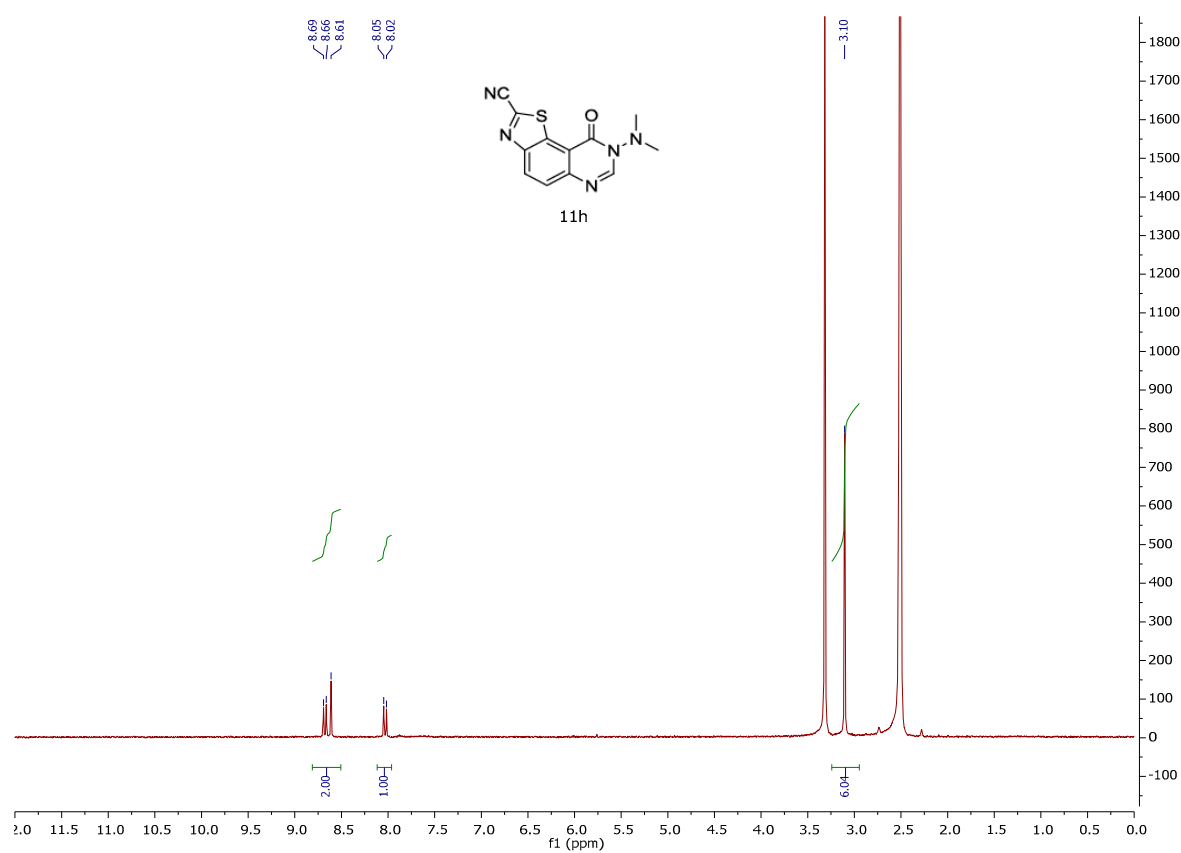

**Figure S15.** <sup>1</sup>H-NMR Compound 11h.



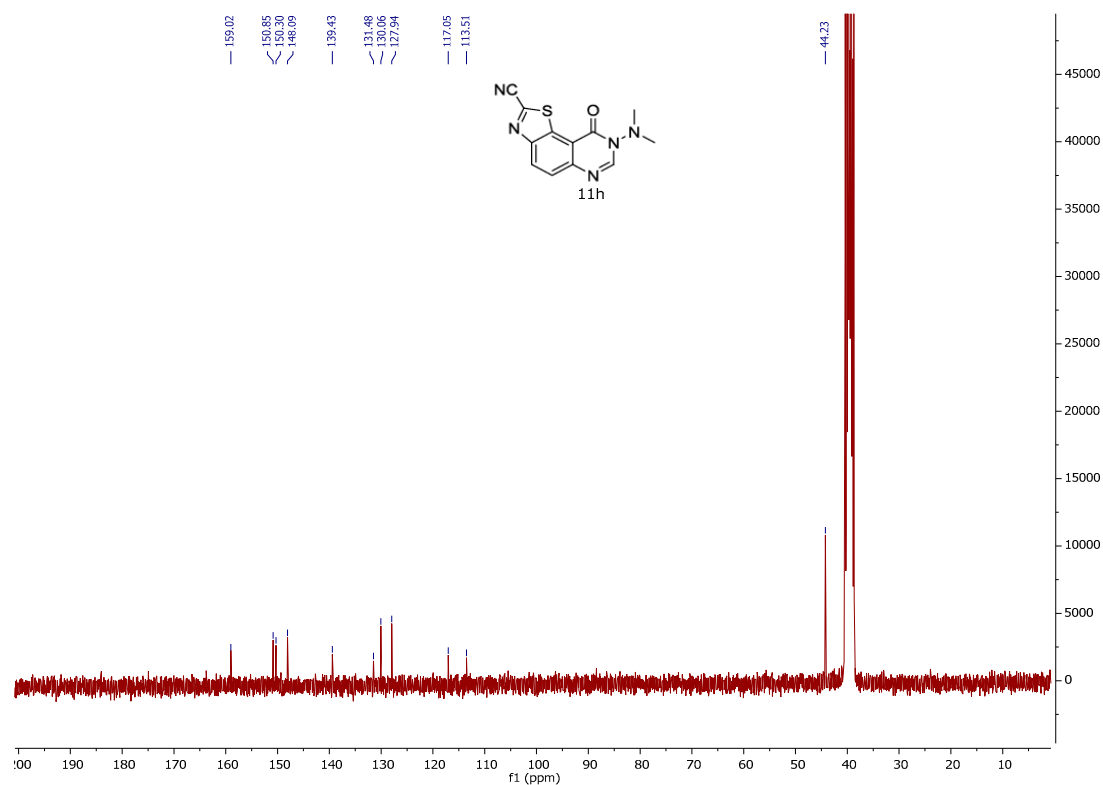Figure S16. <sup>13</sup>C-NMR Compound 11h.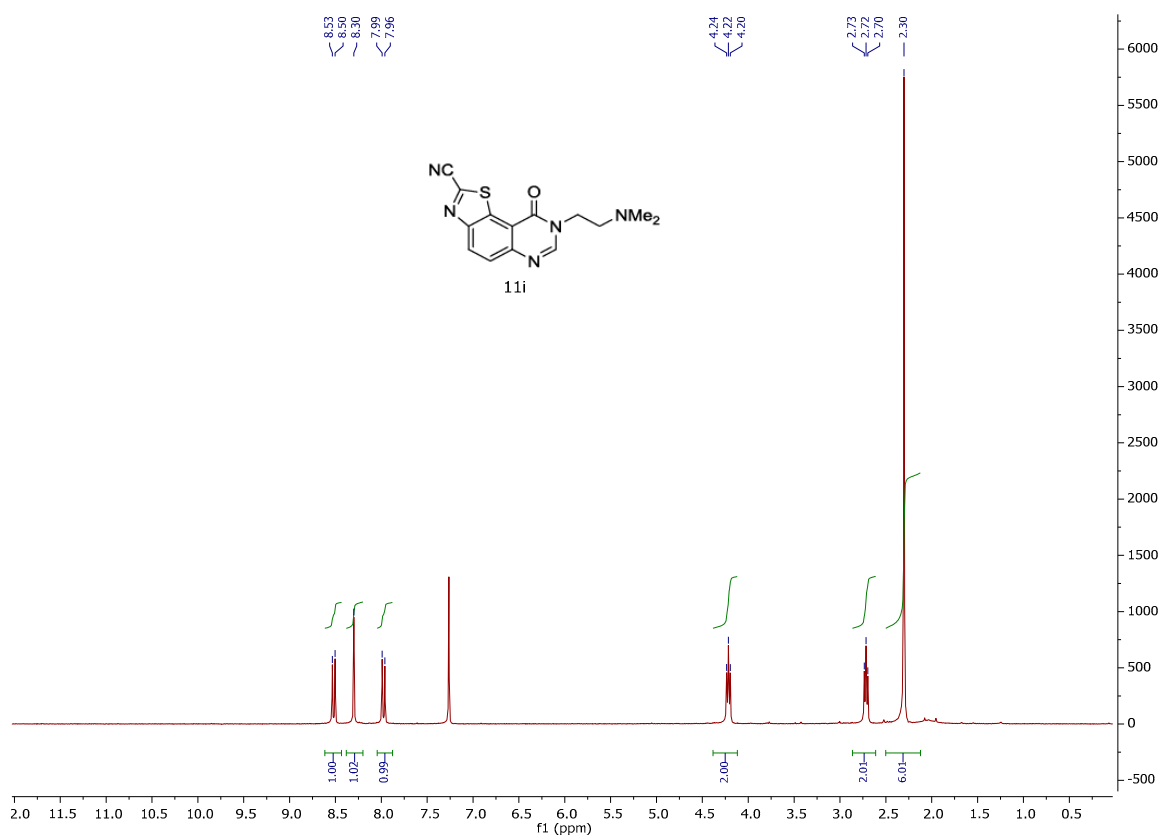Figure S17. <sup>1</sup>H-NMR Compound 11i.

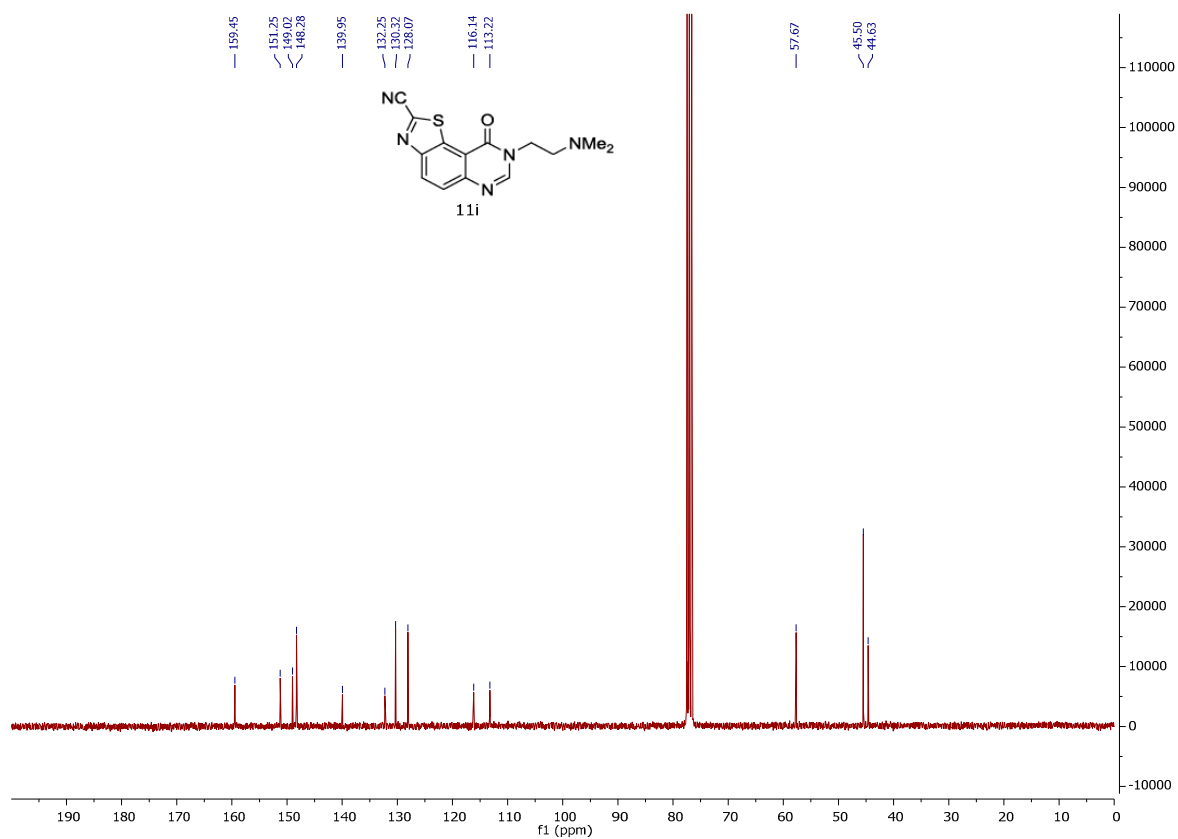Figure S18. <sup>13</sup>C-NMR Compound 11i.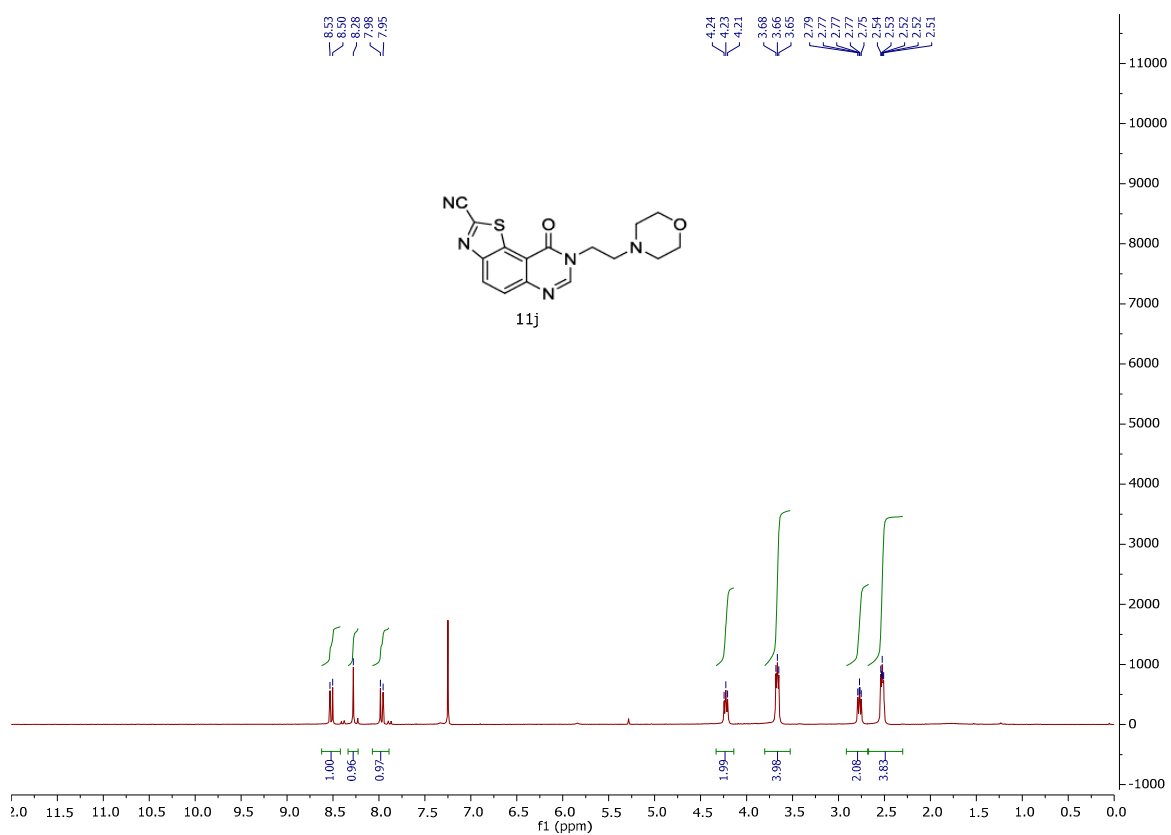Figure S19. <sup>1</sup>H-NMR Compound 11j.

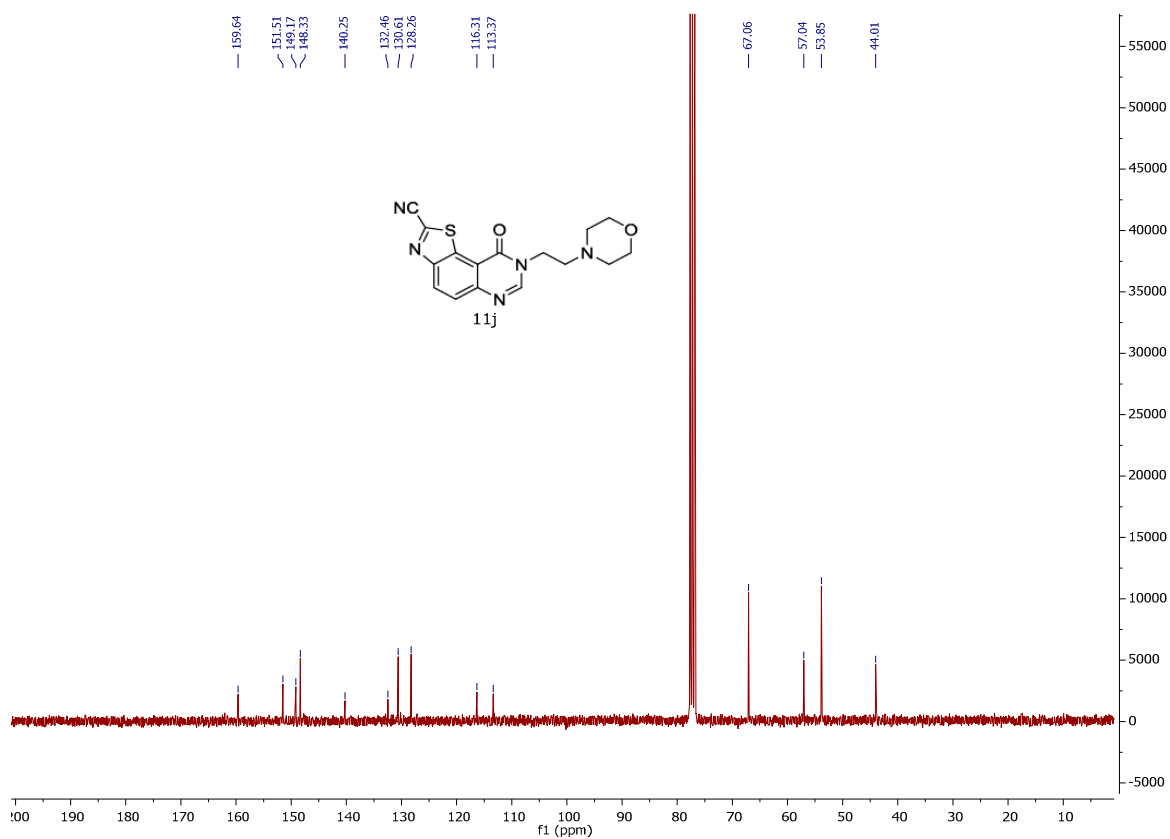Figure S20. <sup>13</sup>C-NMR Compound 11i.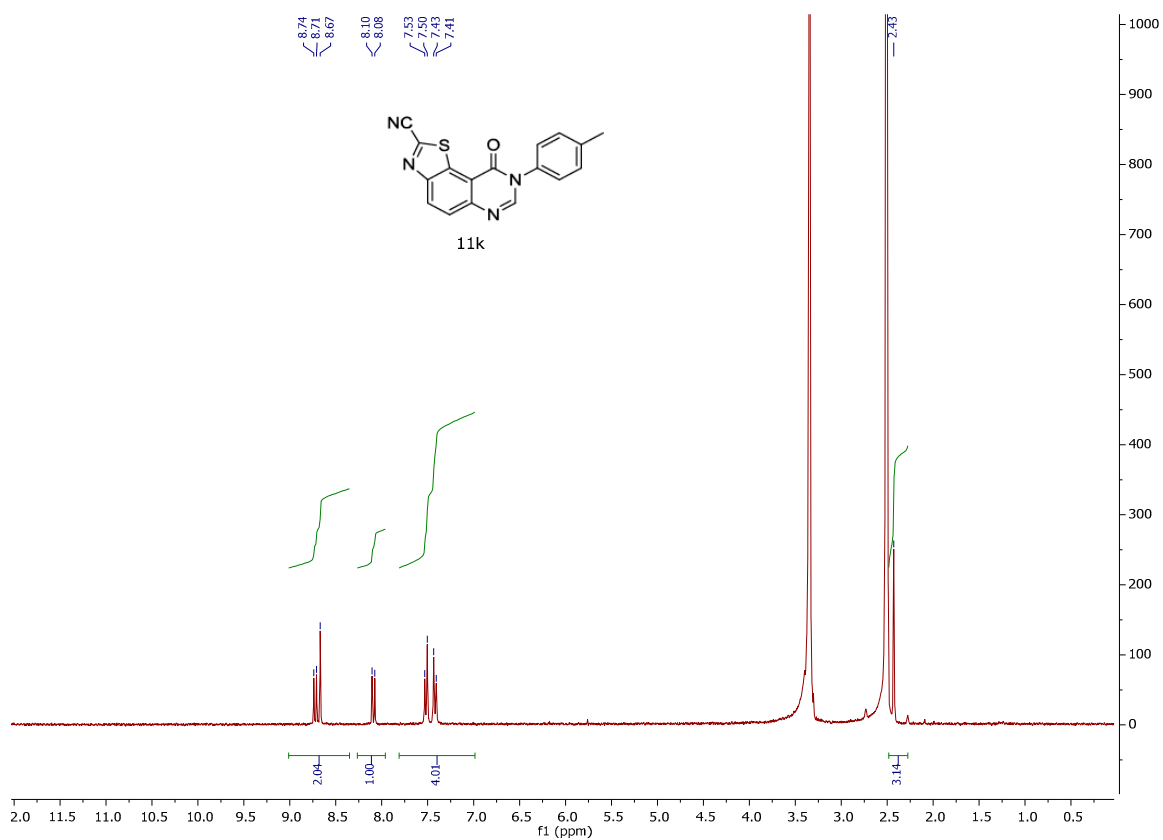Figure S21. <sup>1</sup>H-NMR Compound 11k.

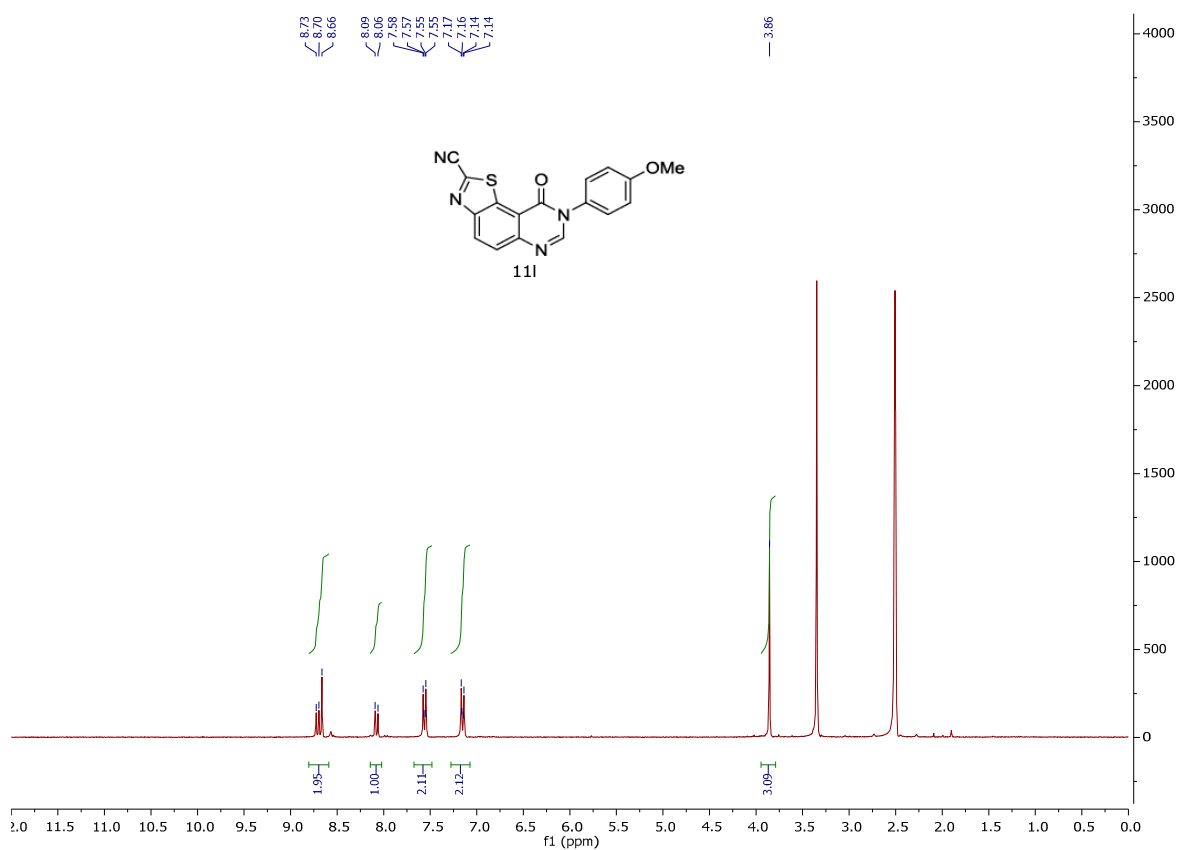Figure S22. <sup>1</sup>H-NMR Compound 11l.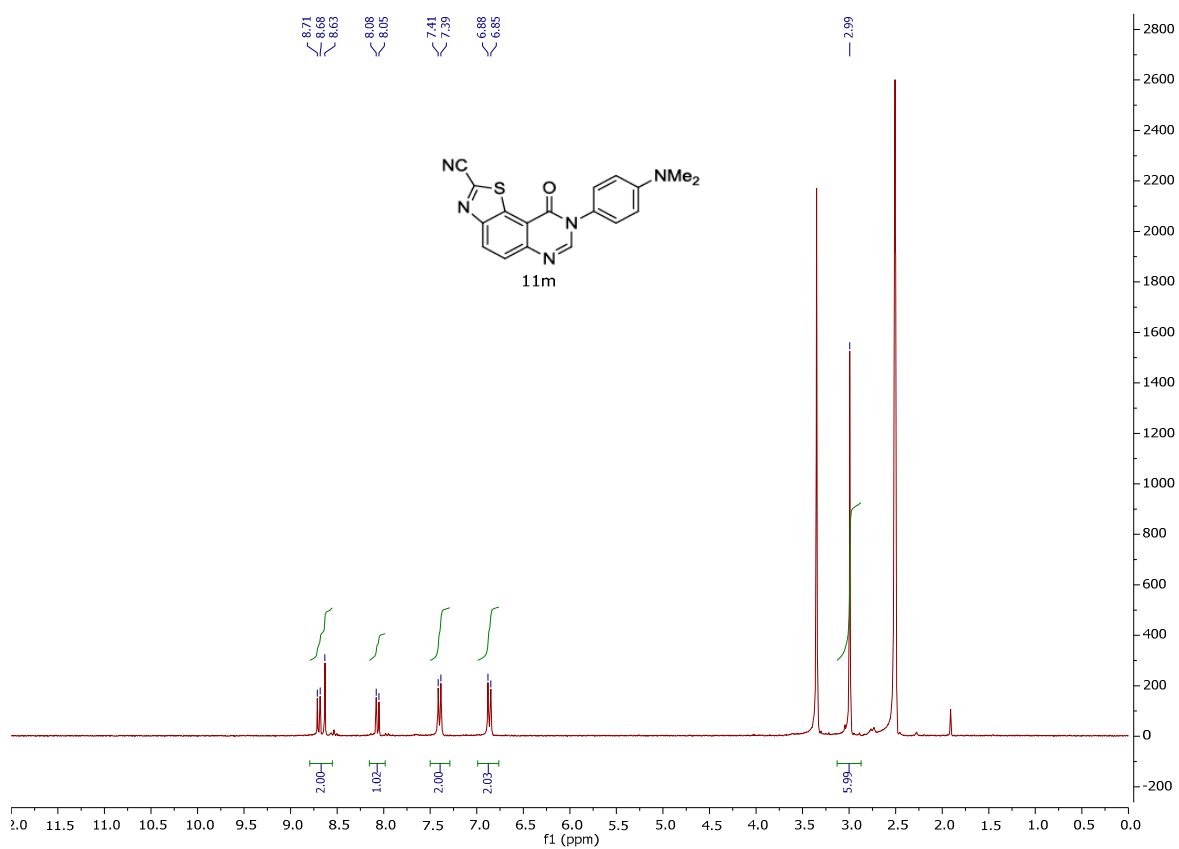Figure S23. <sup>1</sup>H-NMR Compound 11m.

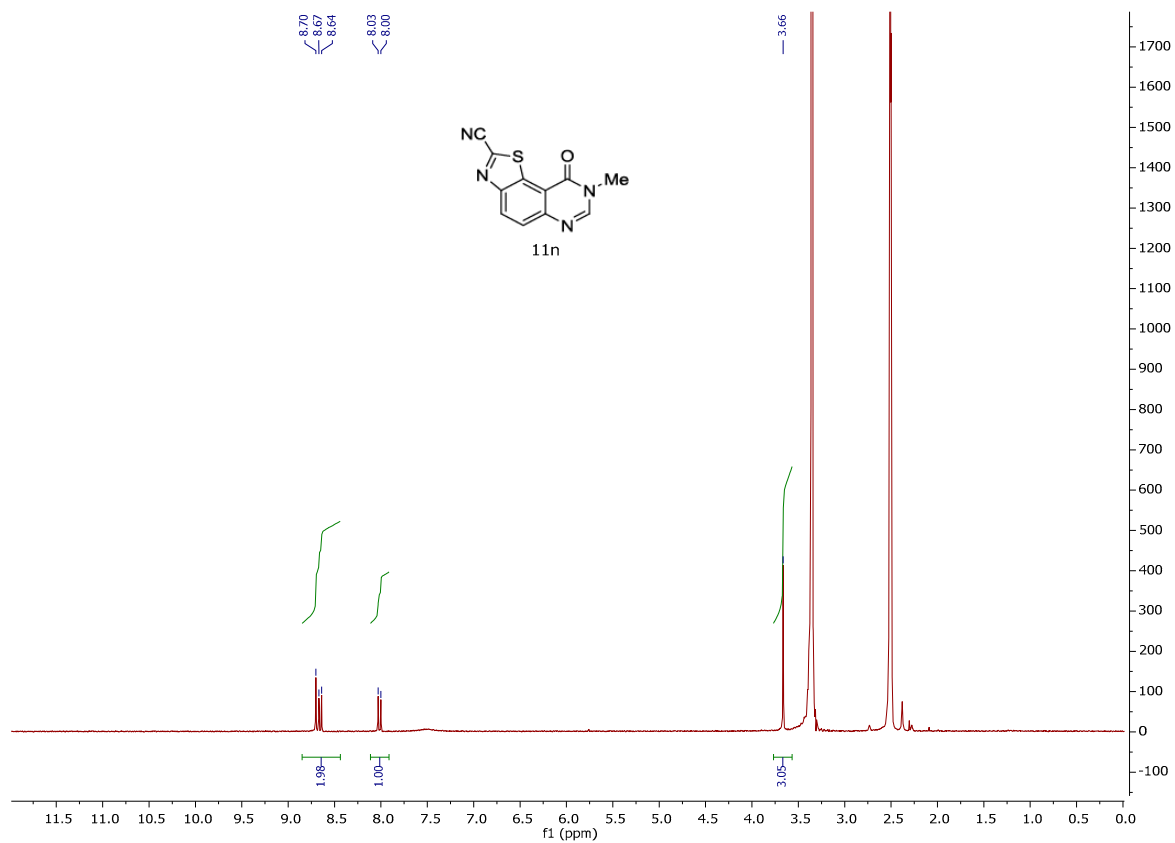Figure S24. <sup>1</sup>H-NMR Compound 11n.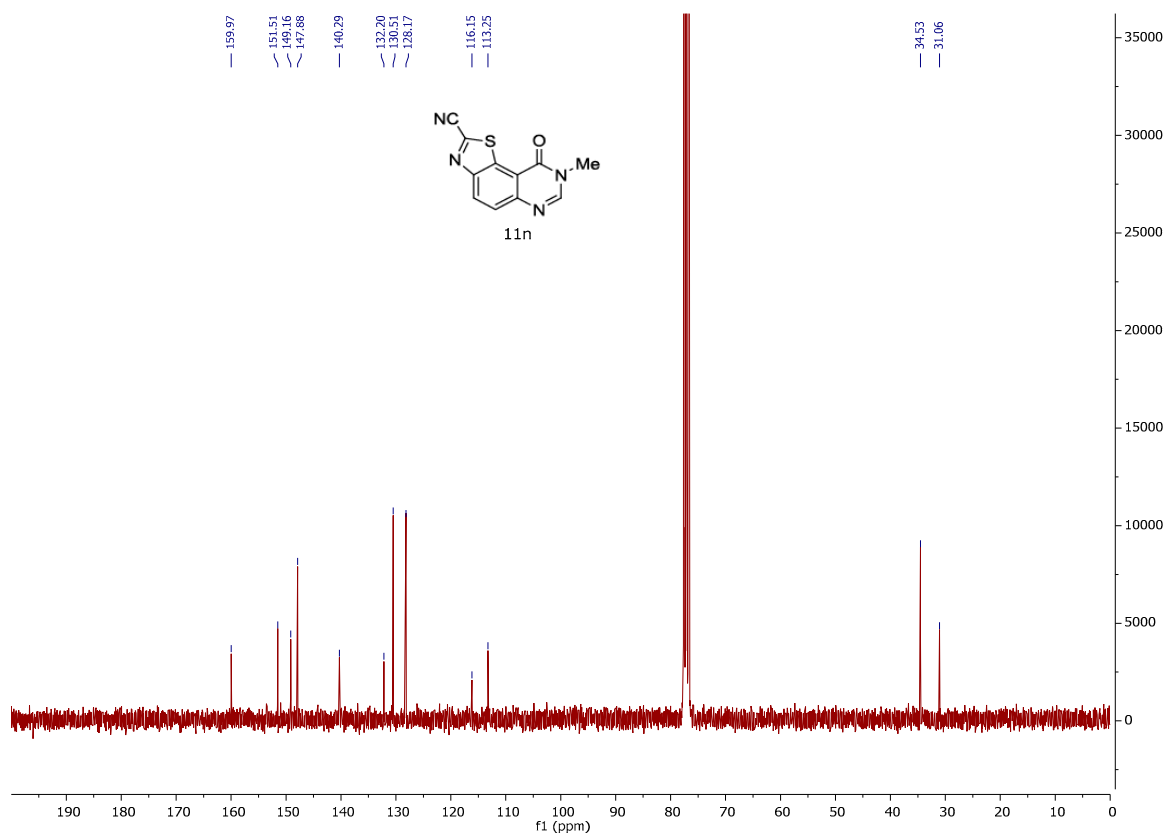Figure S25. <sup>13</sup>C-NMR Compound 11n.

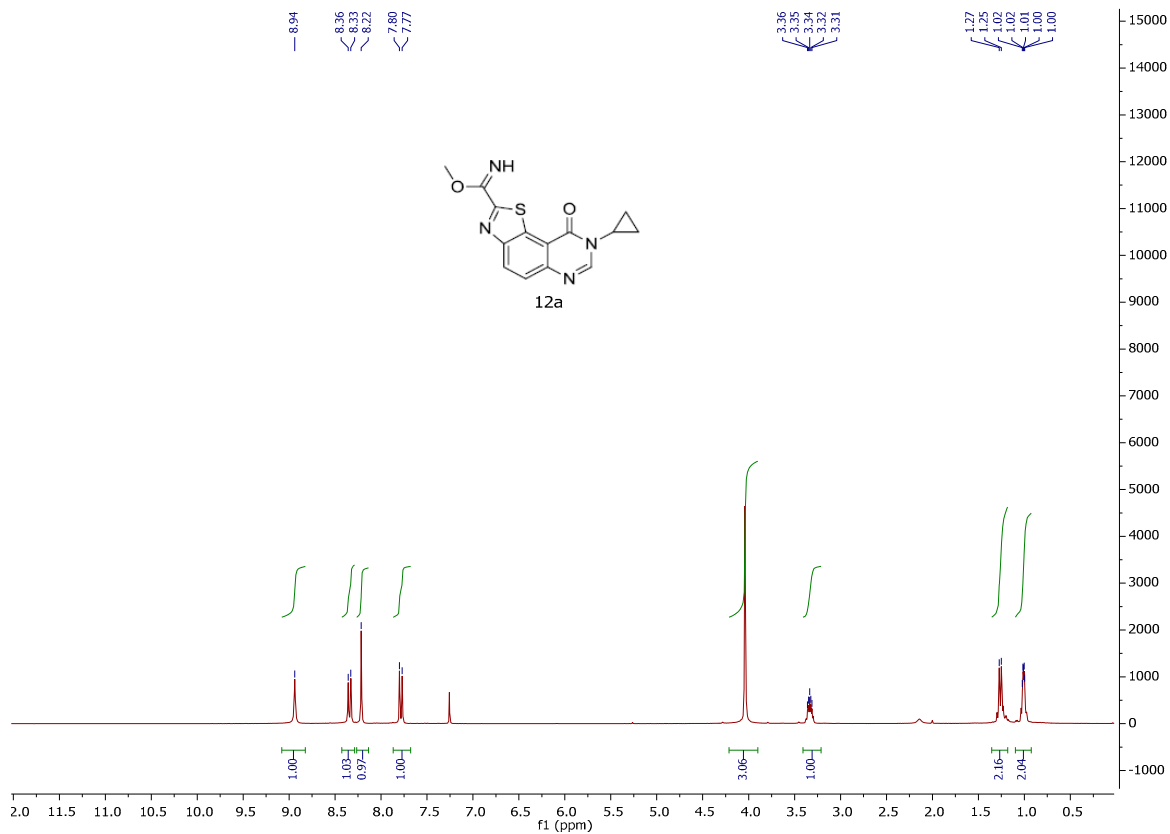

Figure S26. <sup>1</sup>H-NMR Compound 12a.

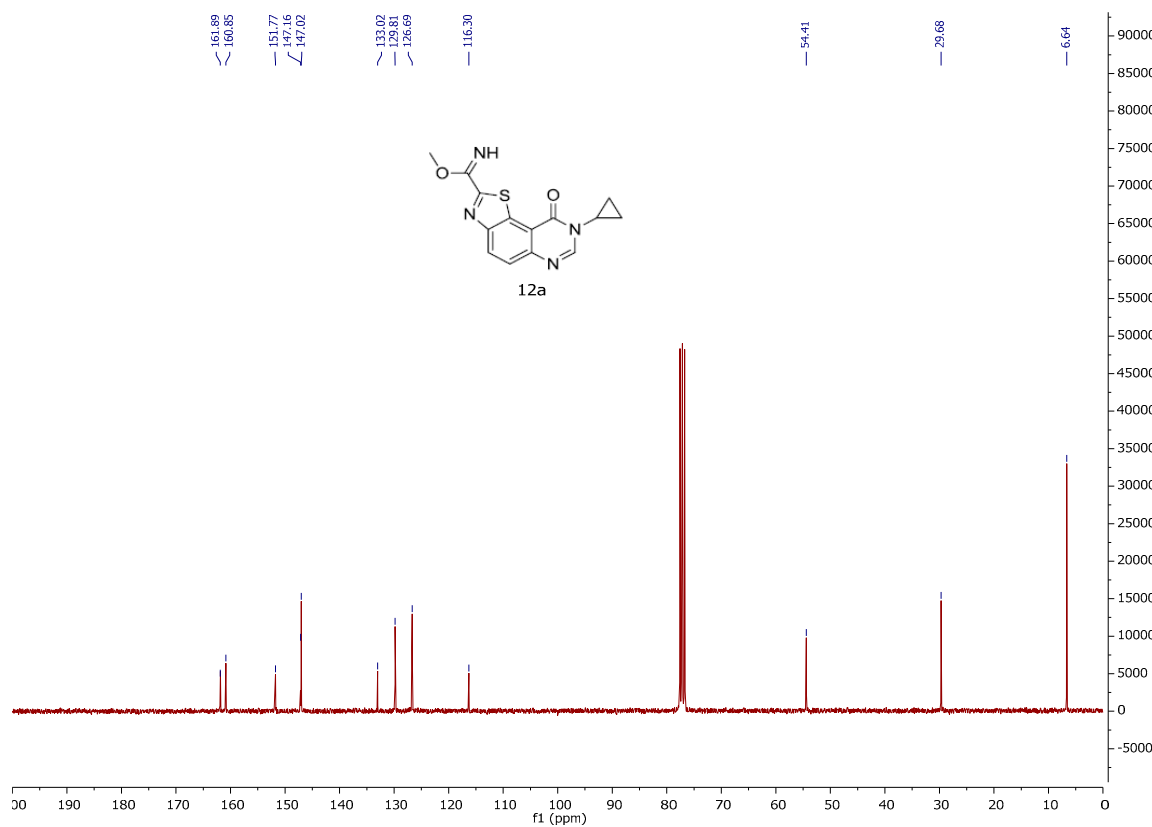

Figure S27. <sup>13</sup>C-NMR Compound 12a.

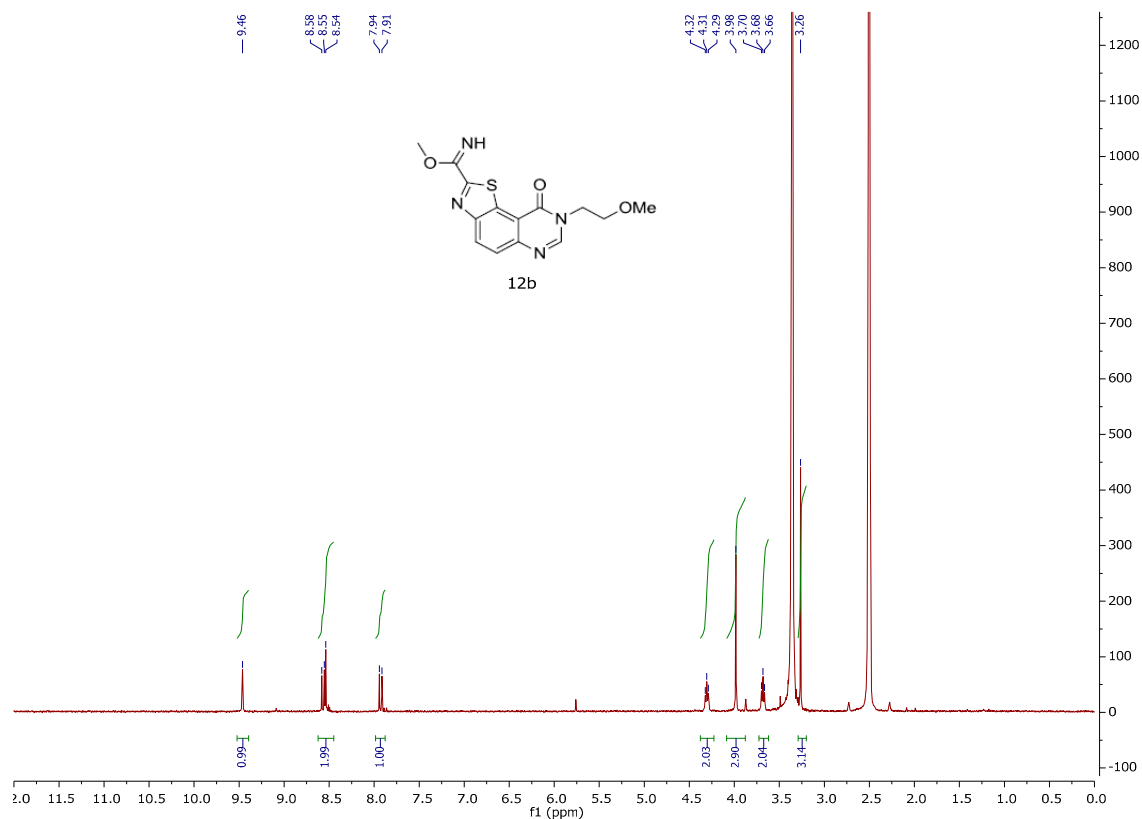Figure S28. <sup>1</sup>H-NMR Compound 12b.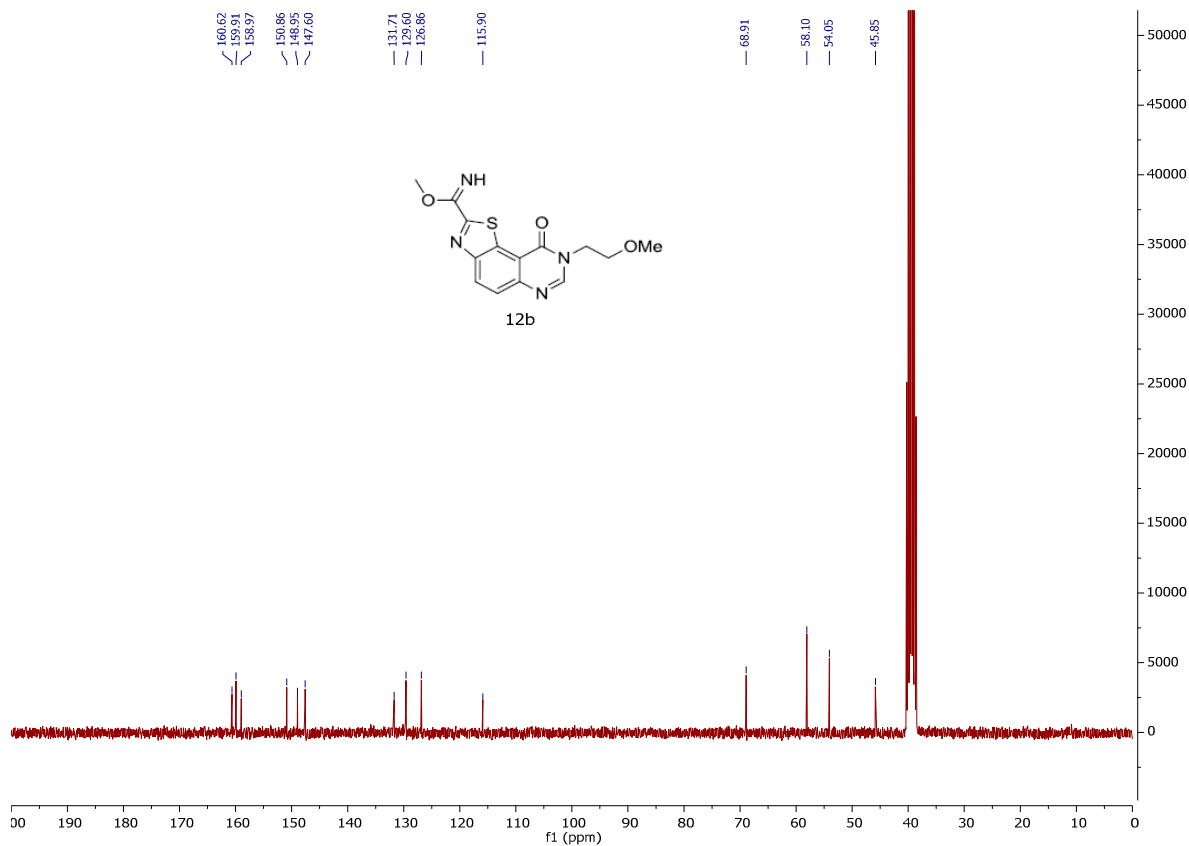Figure S29. <sup>13</sup>C-NMR Compound 12b.

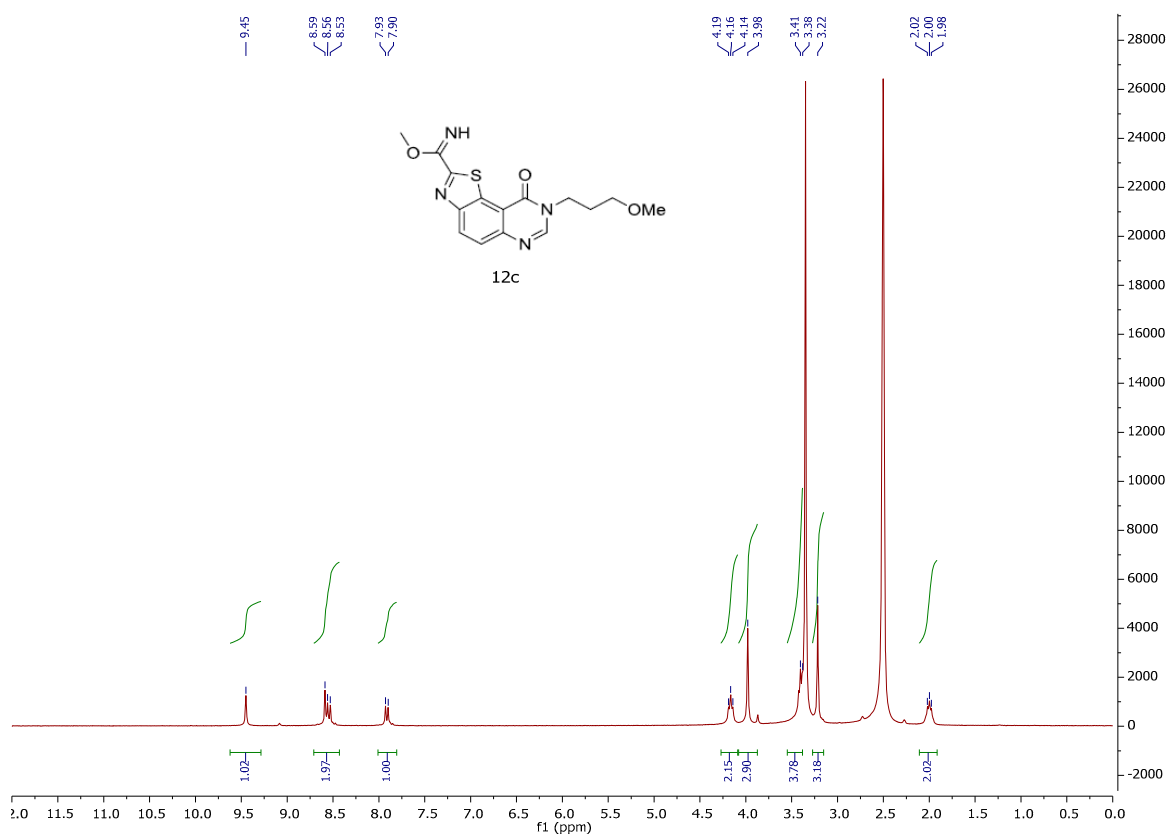Figure S30. <sup>1</sup>H-NMR Compound 12c.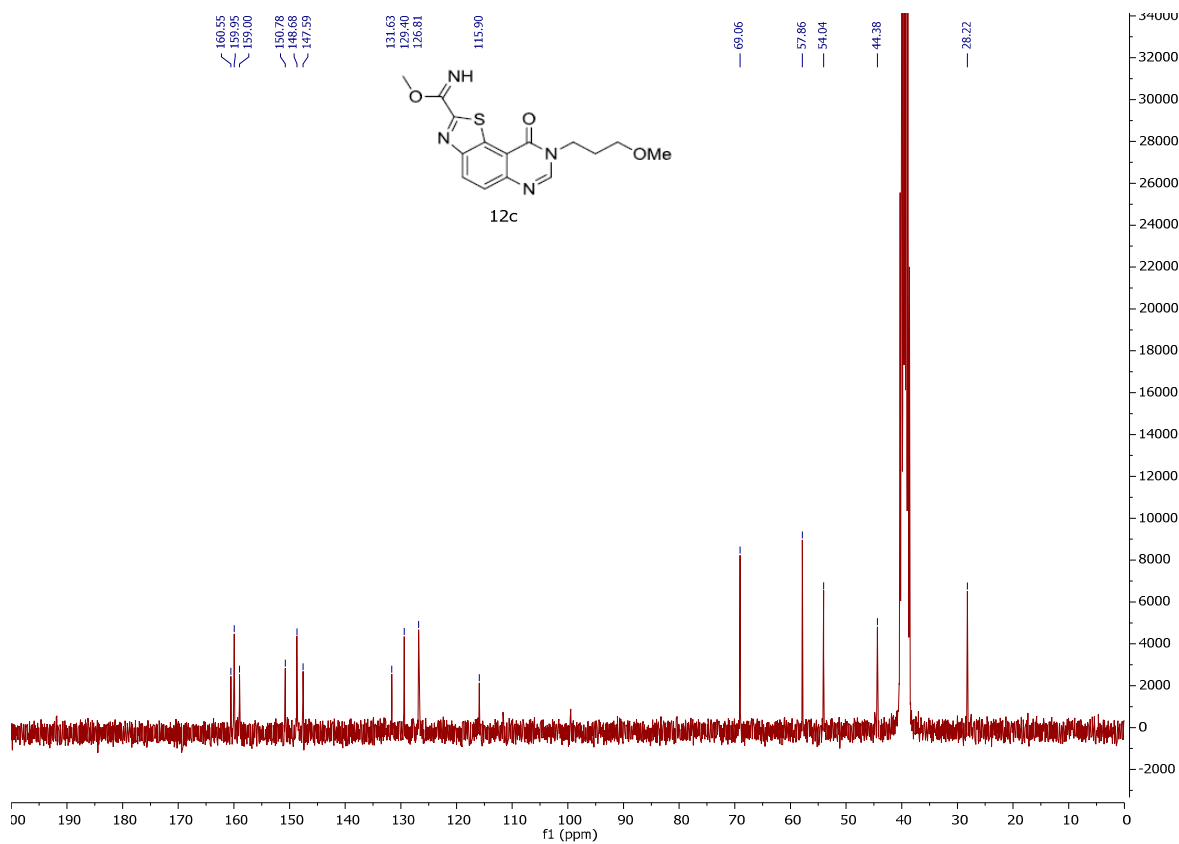Figure S31. <sup>13</sup>C-NMR Compound 12c.



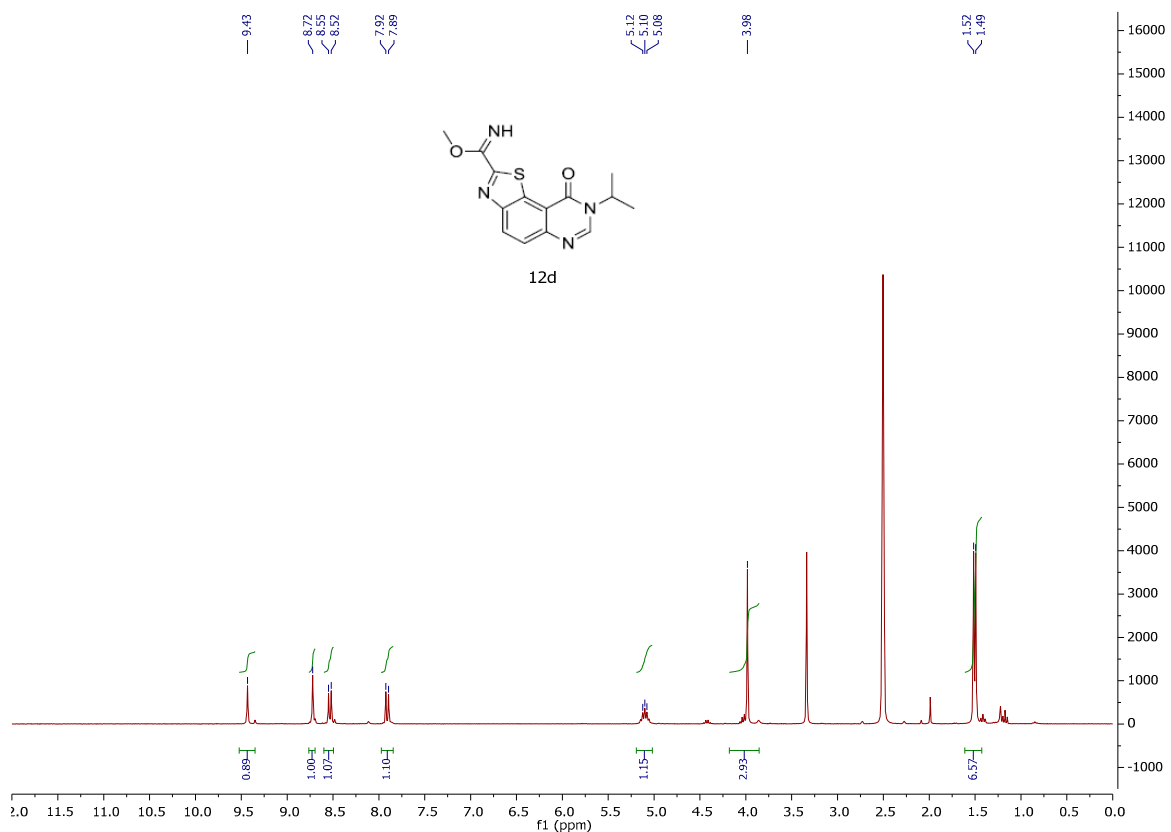Figure S32. <sup>1</sup>H-NMR Compound 12d.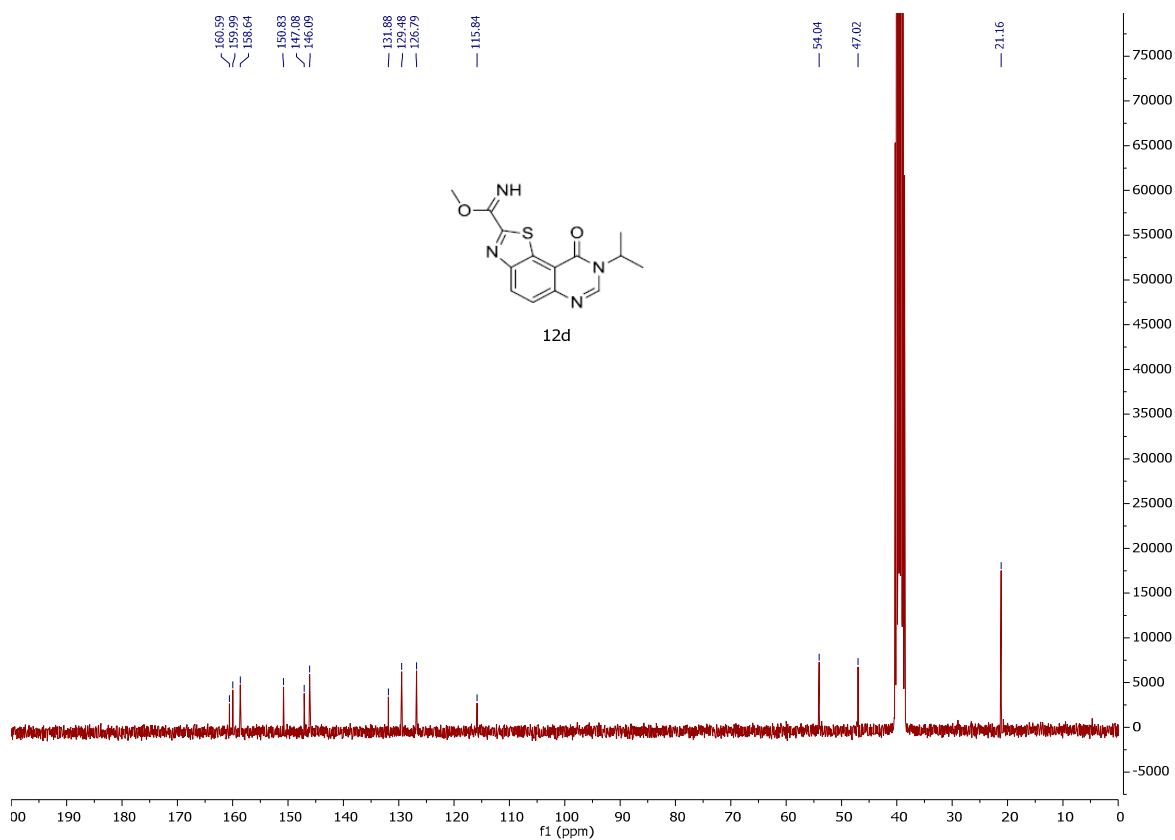Figure S33. <sup>13</sup>C-NMR Compound 12d.

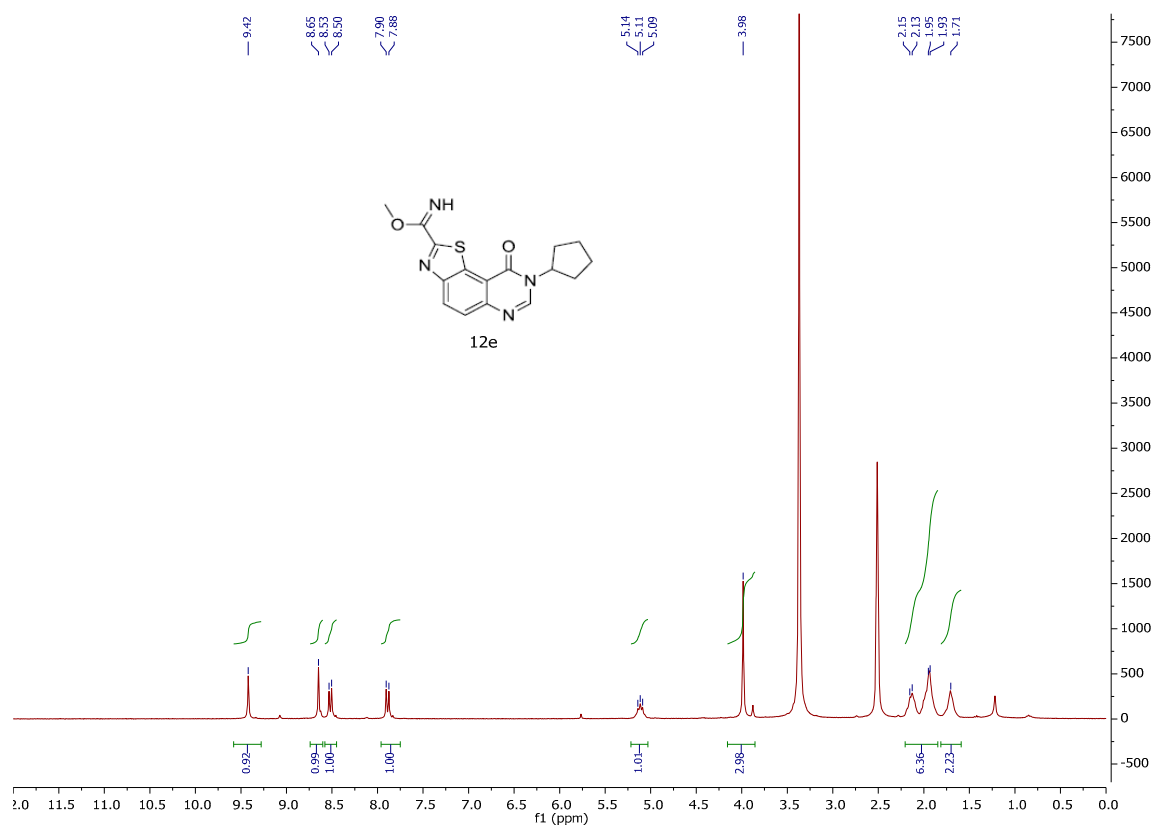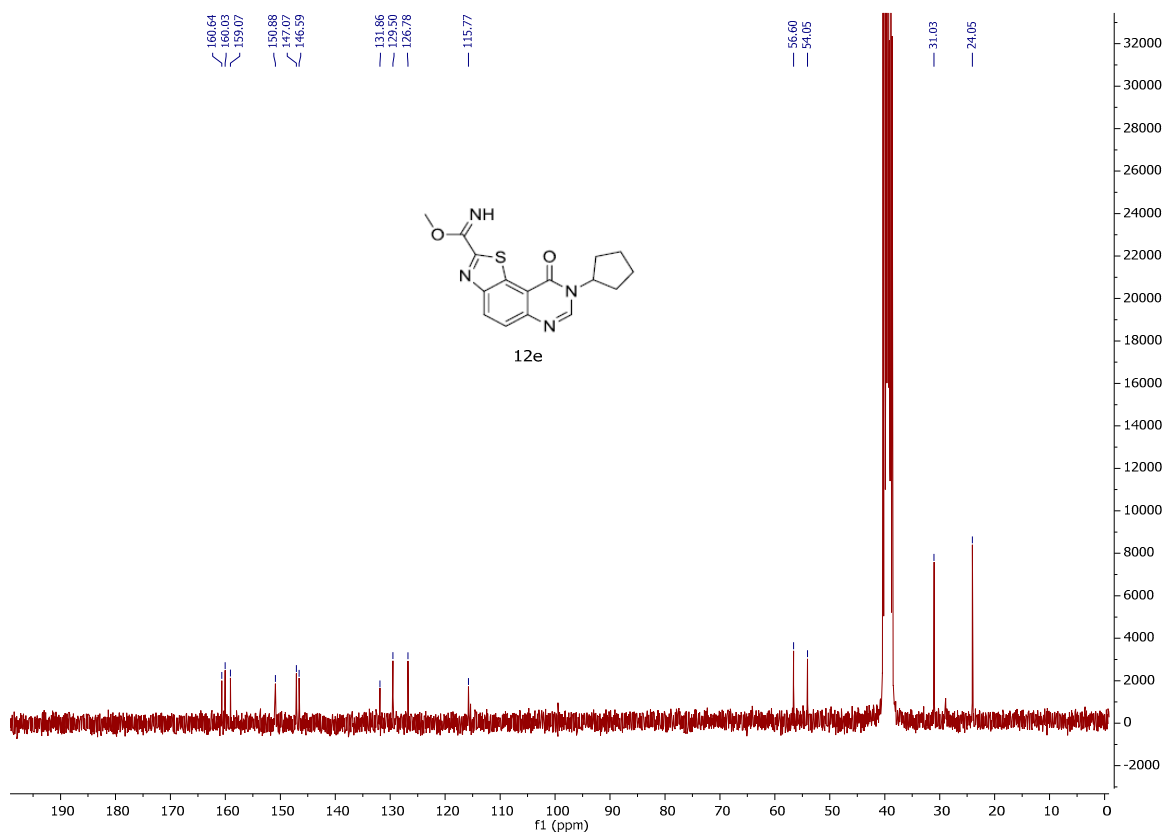

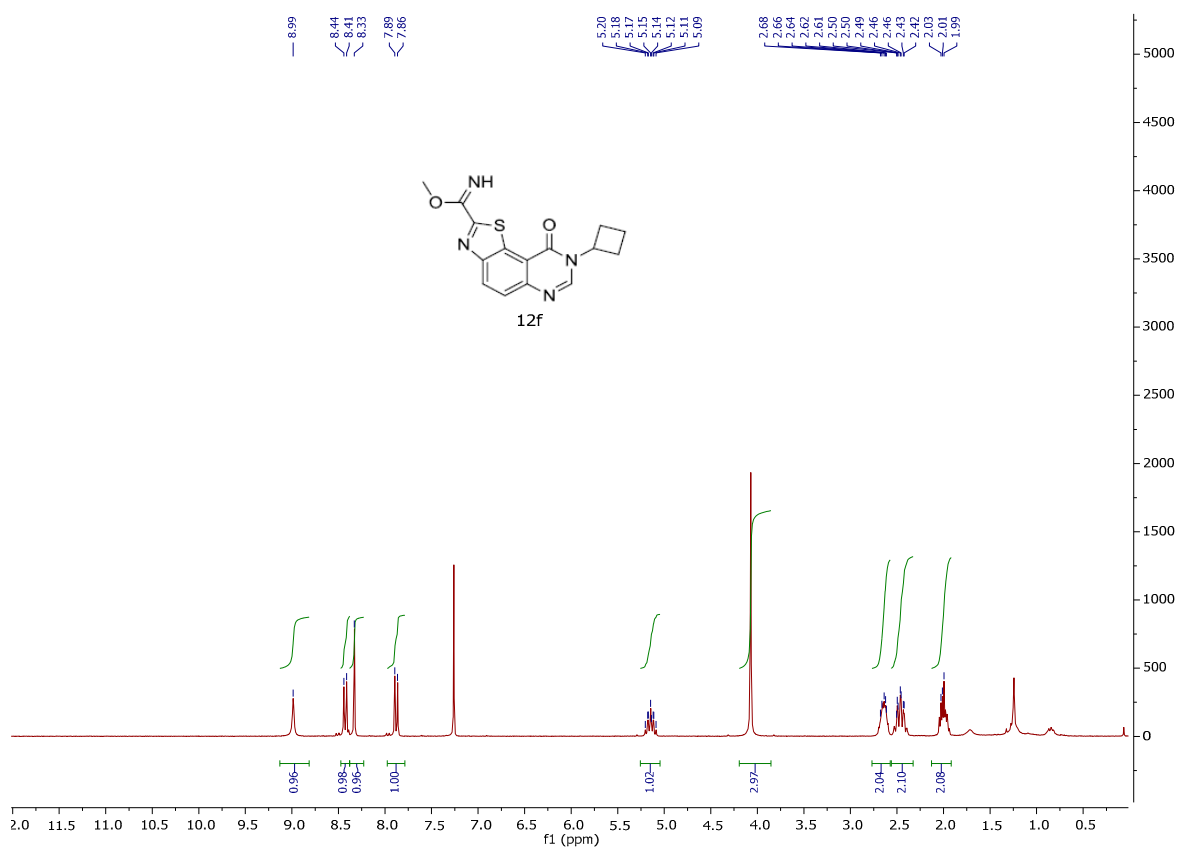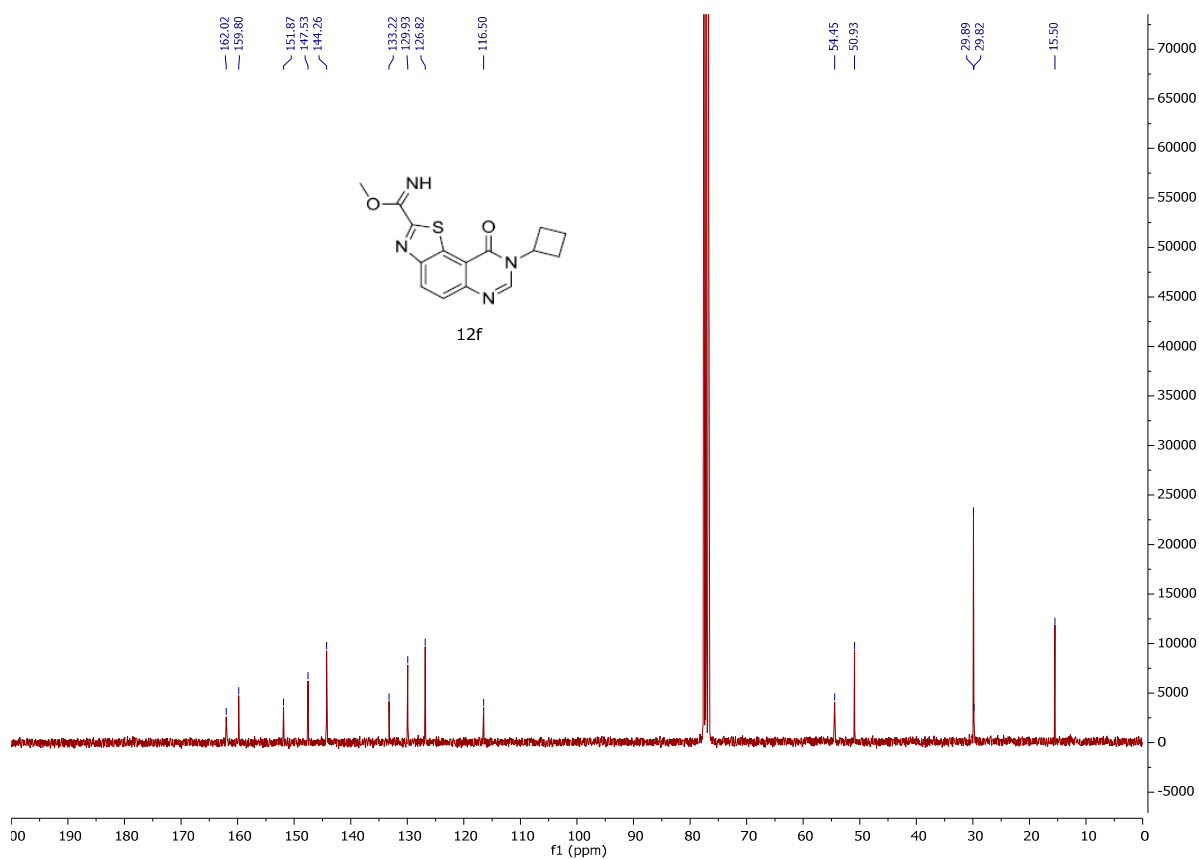

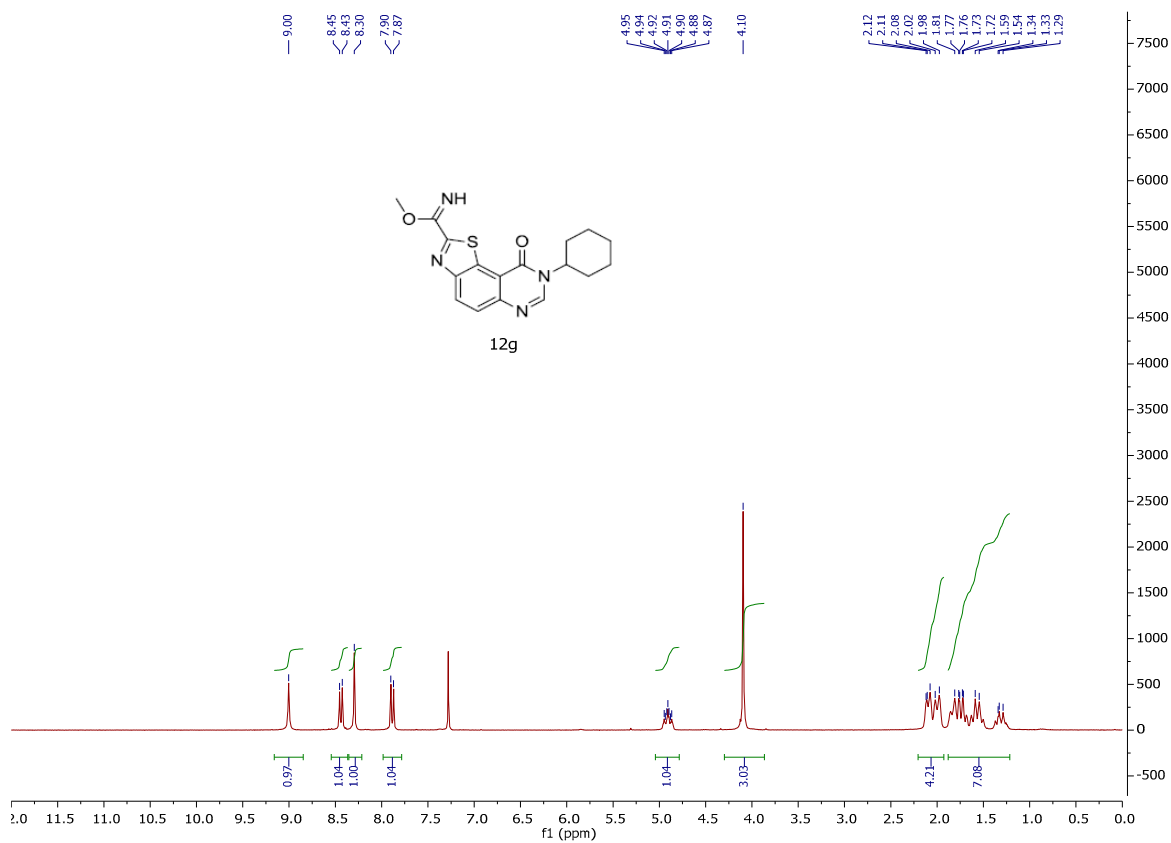Figure S38. <sup>1</sup>H-NMR Compound 12g.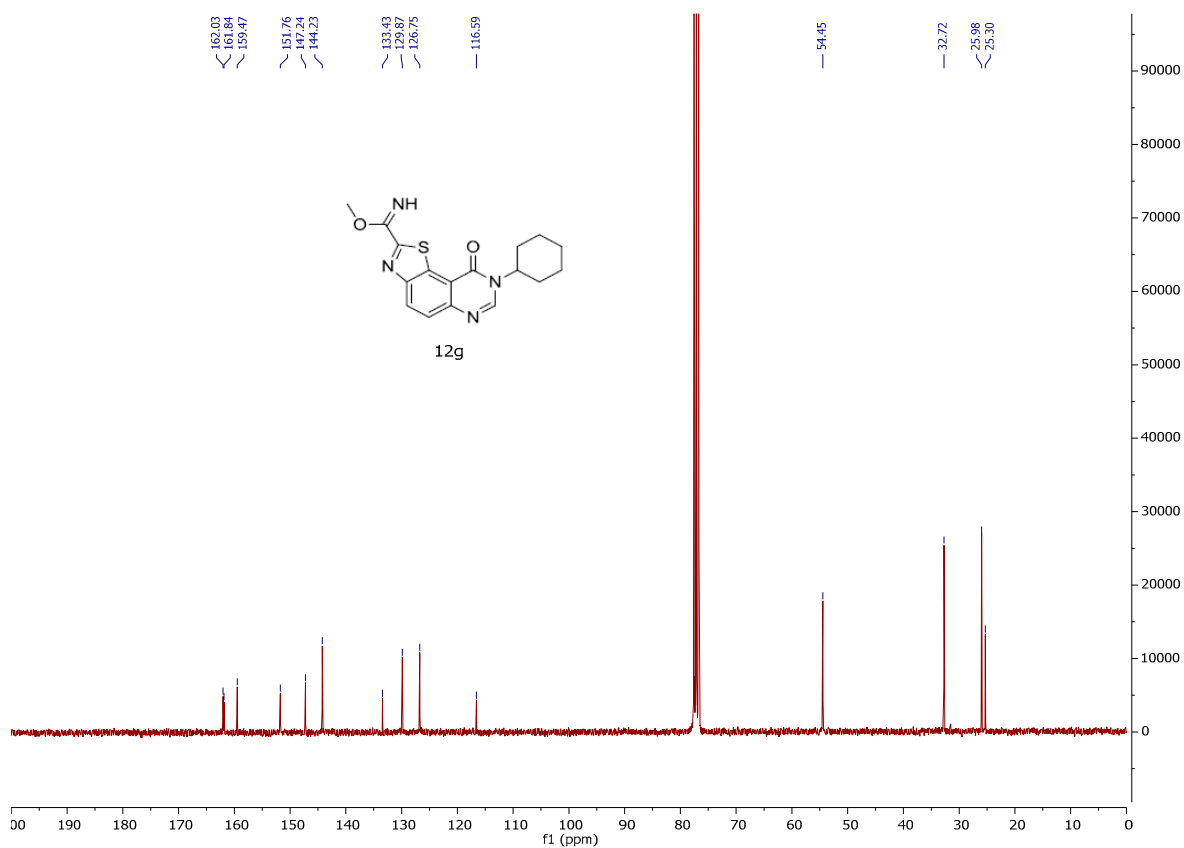Figure S39. <sup>13</sup>C-NMR Compound 12g.

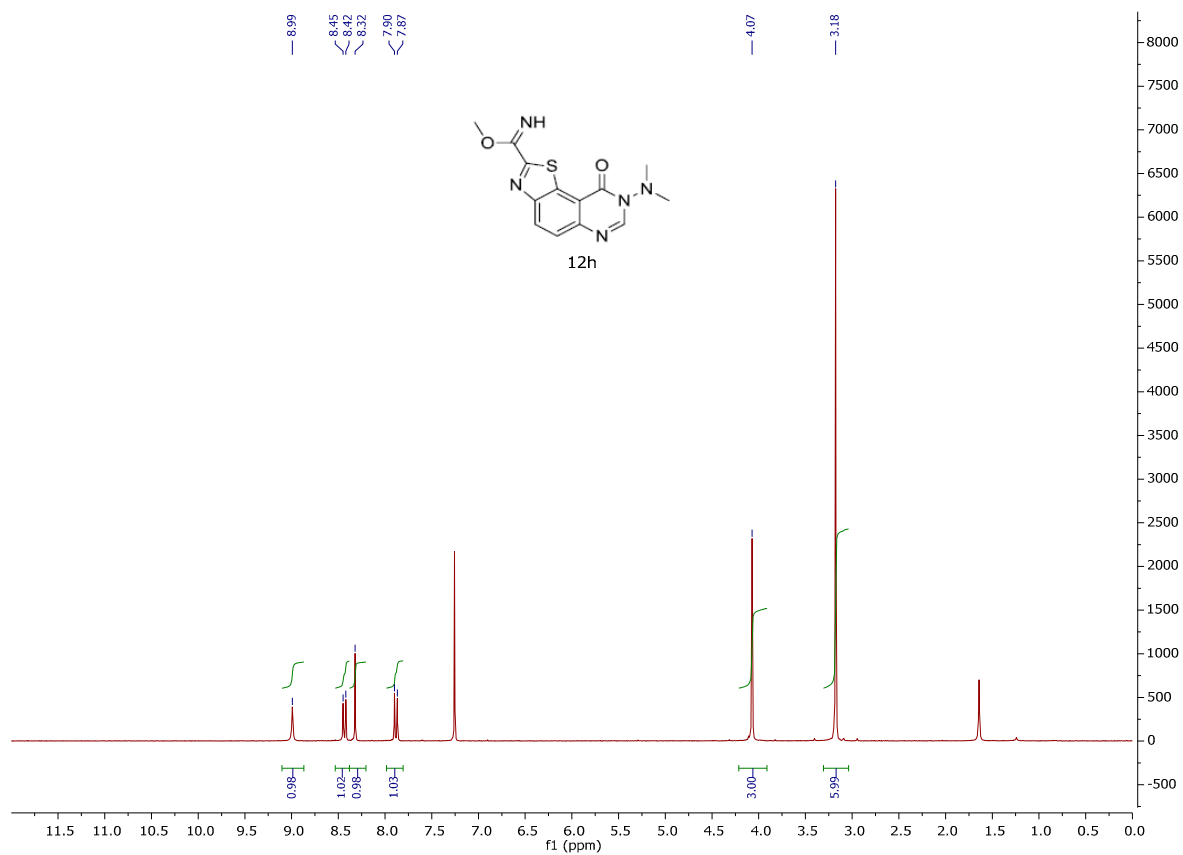Figure S40. <sup>1</sup>H-NMR Compound 12h.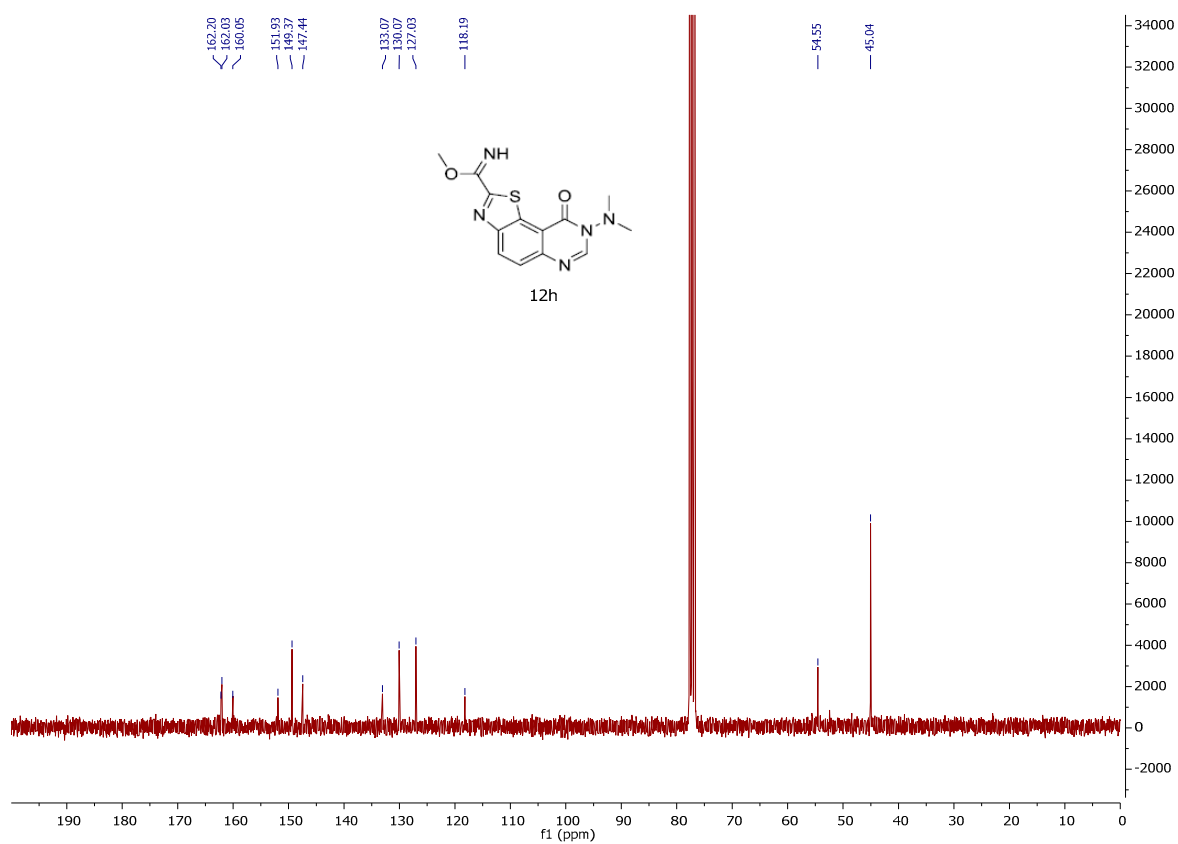Figure S41. <sup>13</sup>C-NMR Compound 12h.

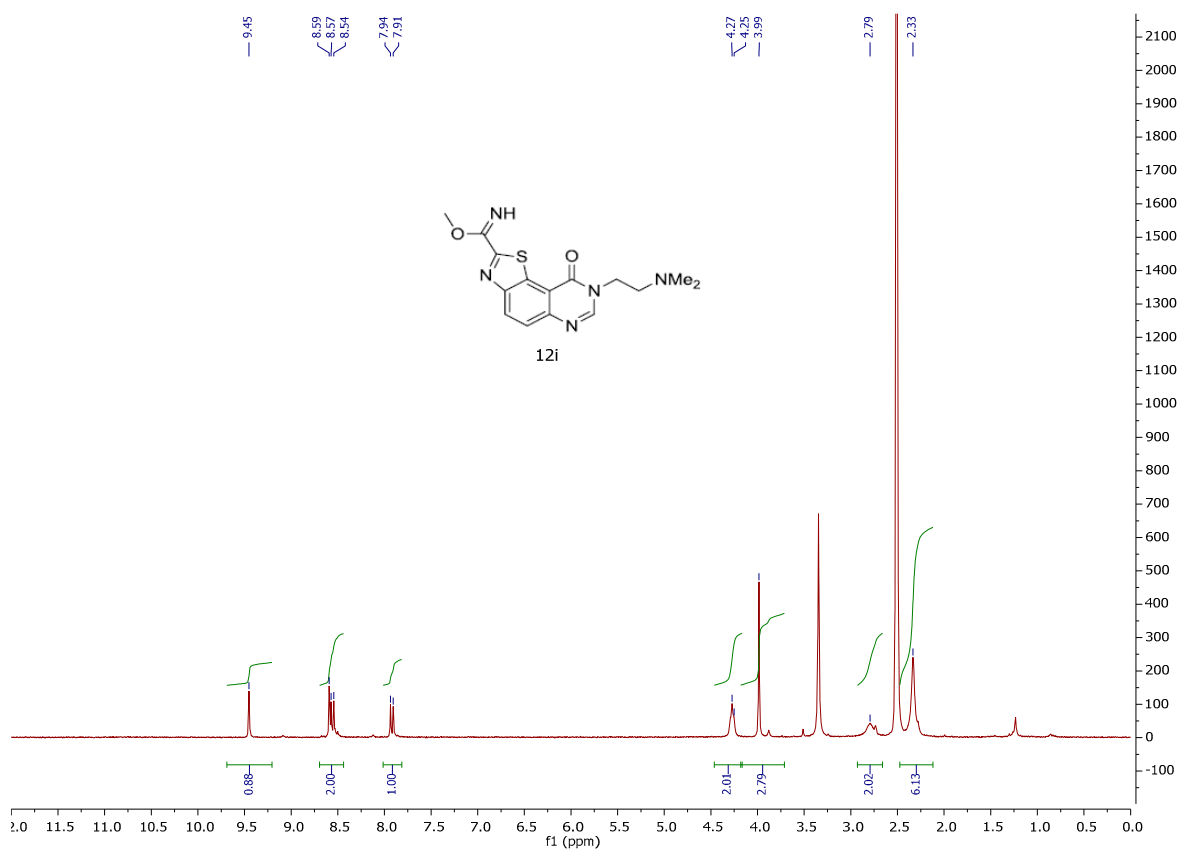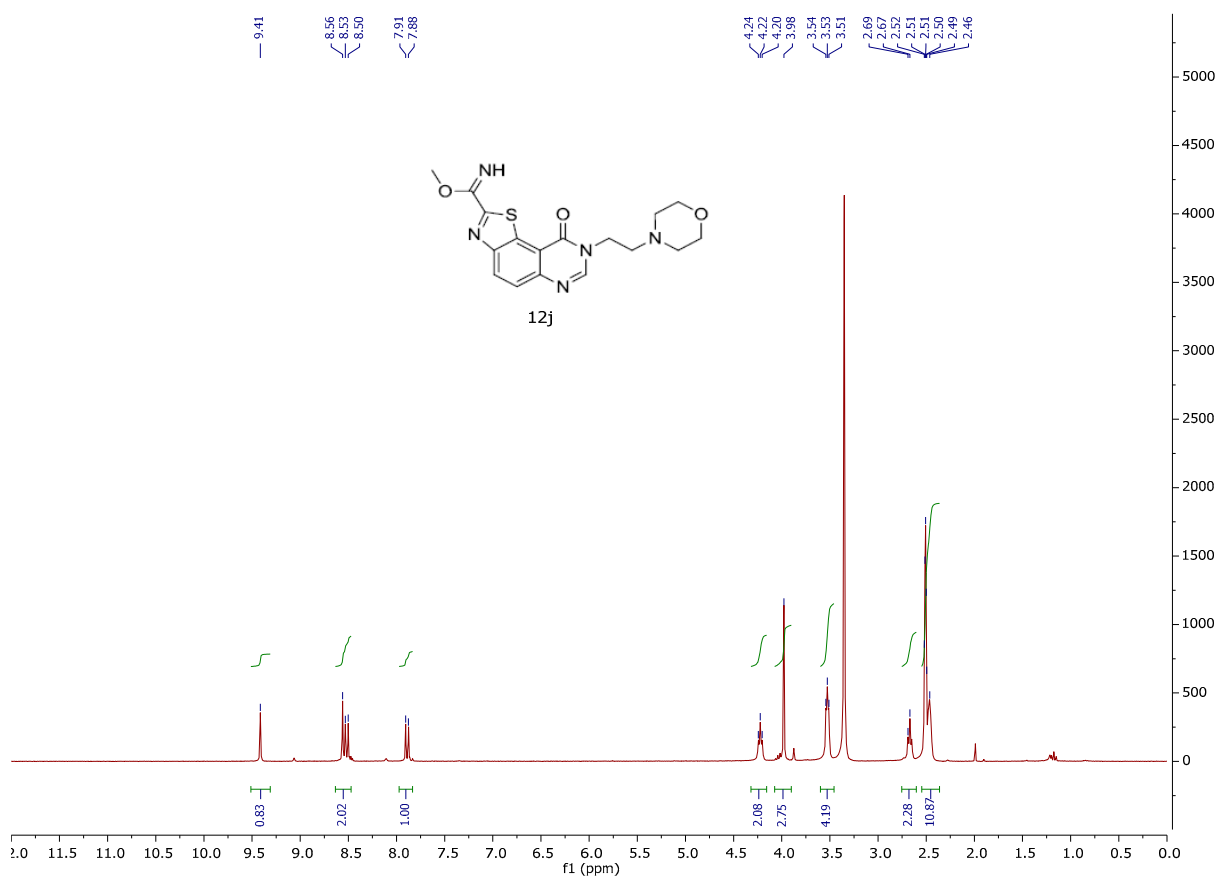

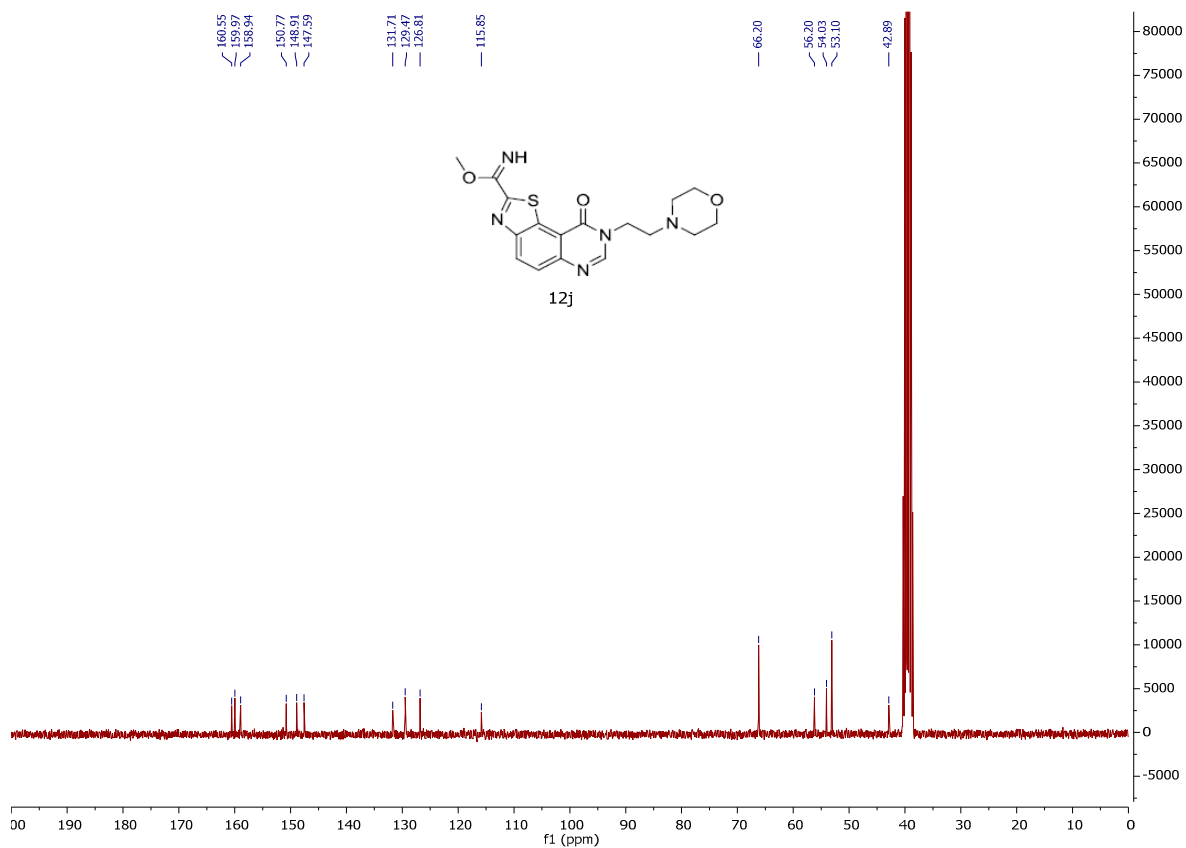Figure S44. <sup>13</sup>C-NMR Compound 12j.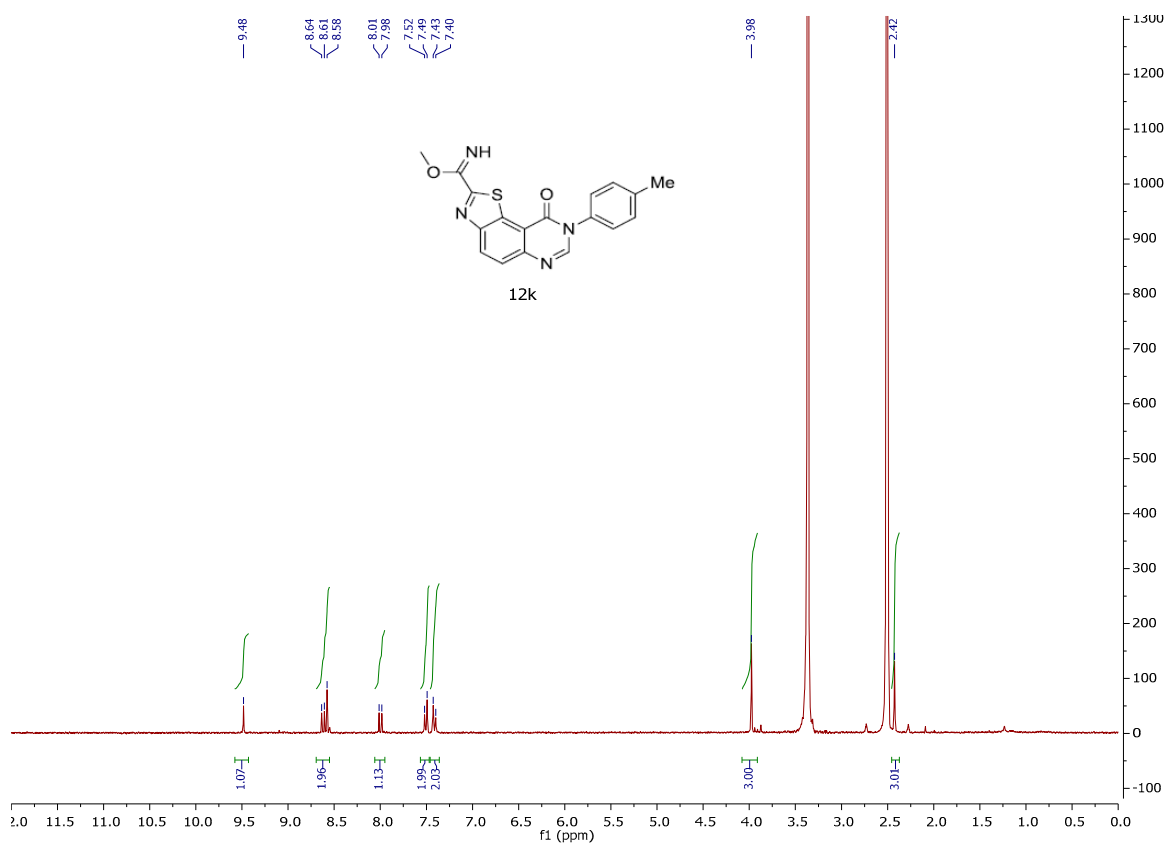Figure S45. <sup>1</sup>H-NMR Compound 12k.

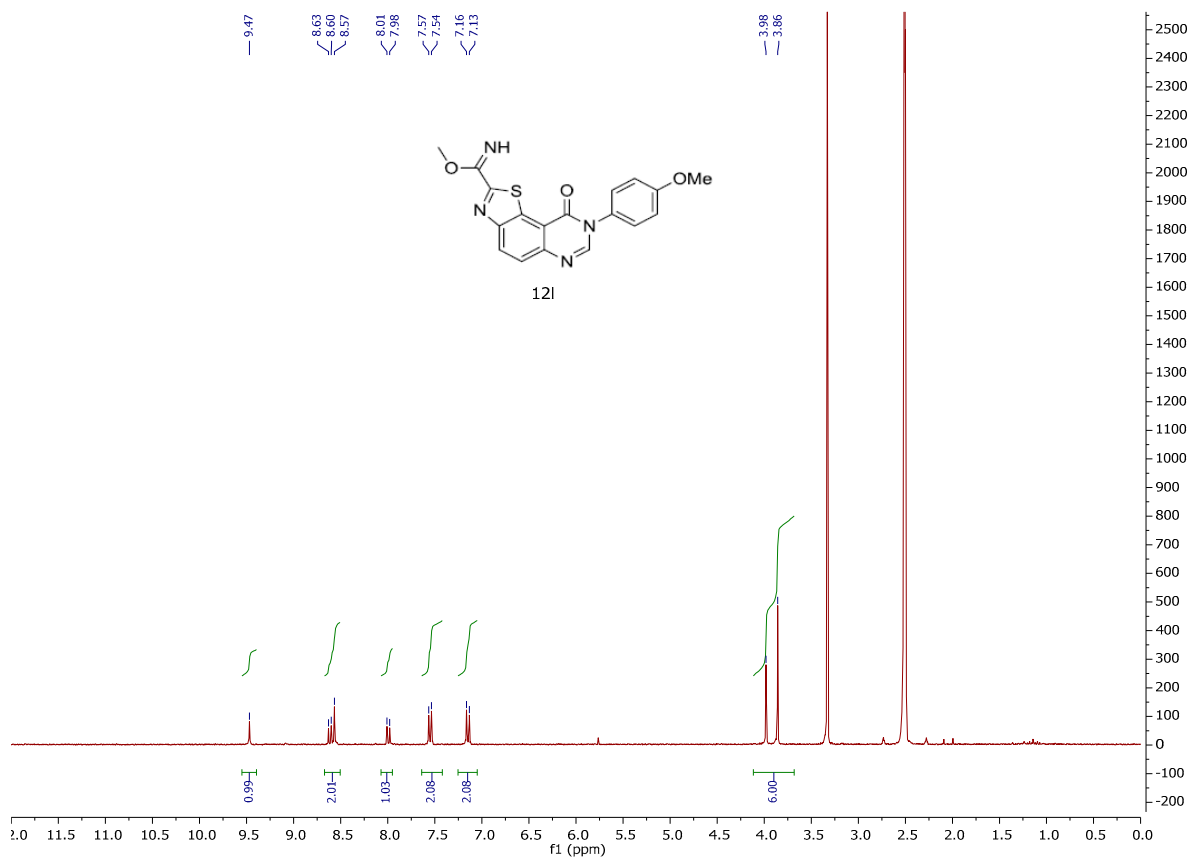Figure S46. <sup>1</sup>H-NMR Compound 12l.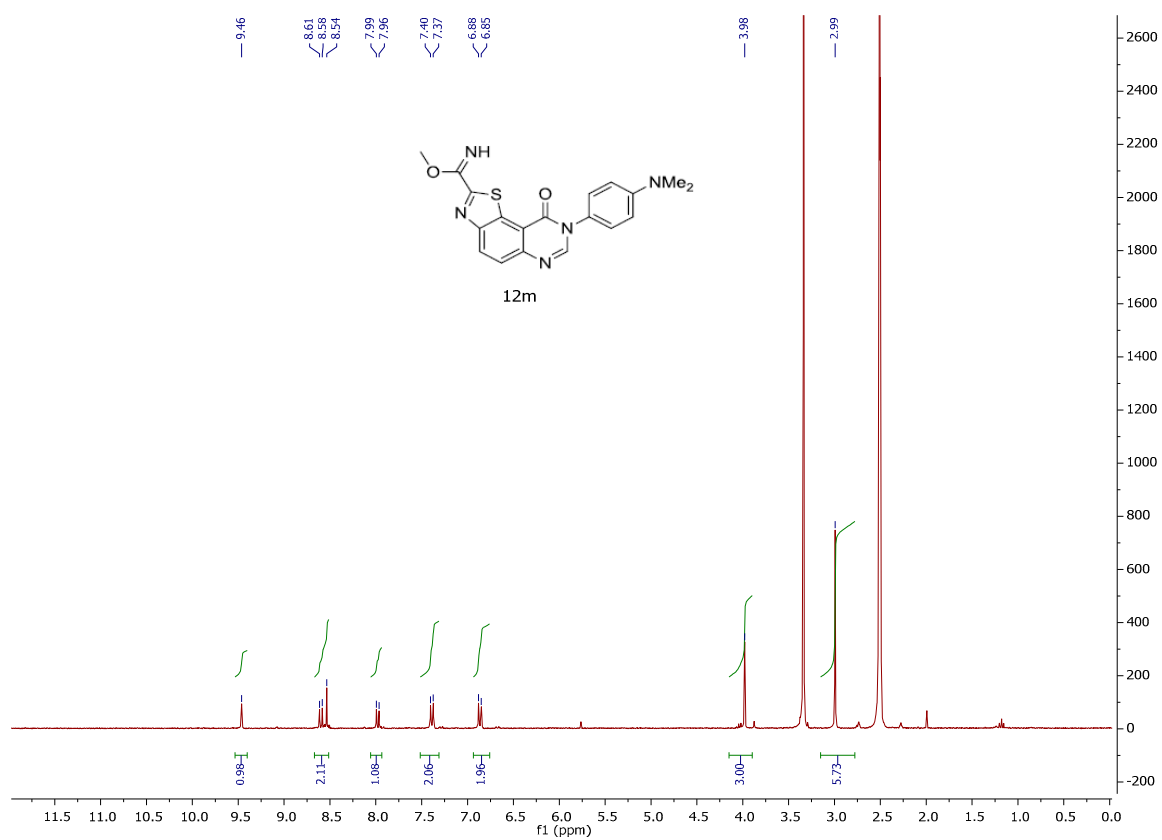Figure S47. <sup>1</sup>H-NMR Compound 12l.



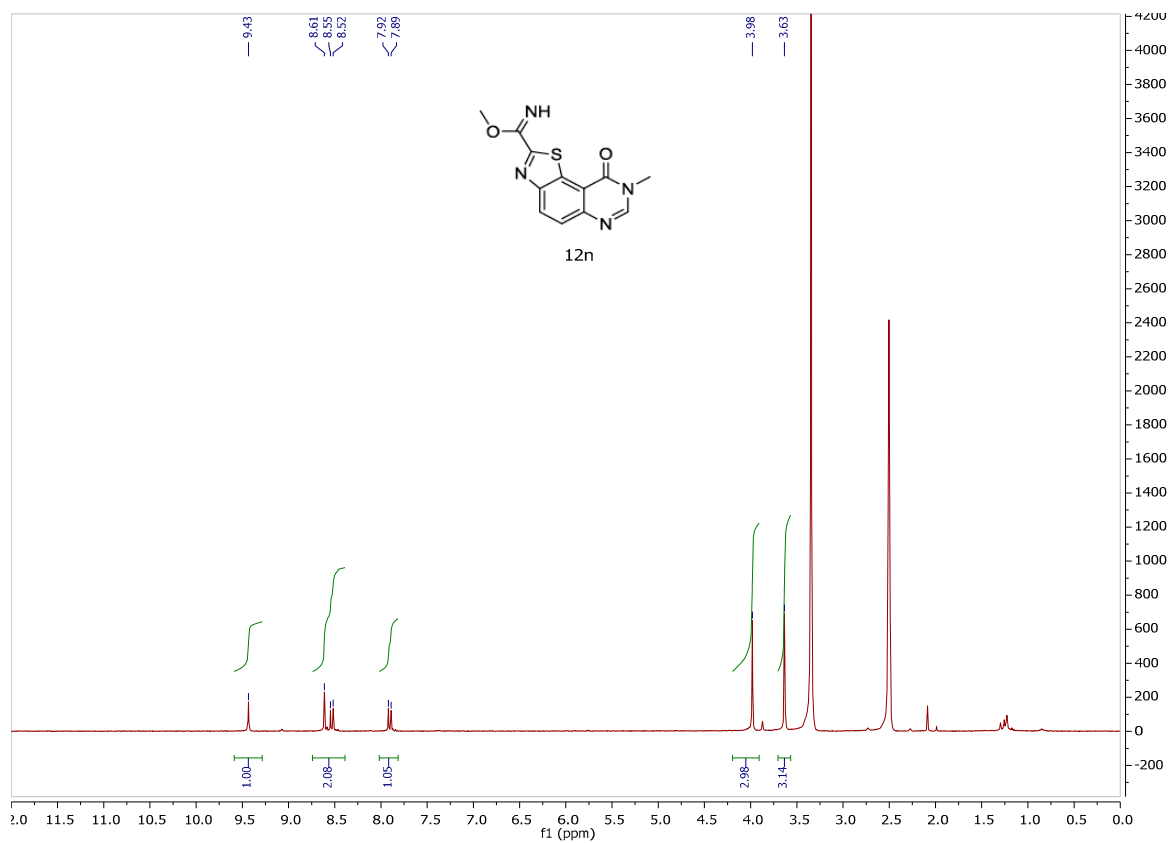Figure S48. <sup>1</sup>H-NMR Compound 12n.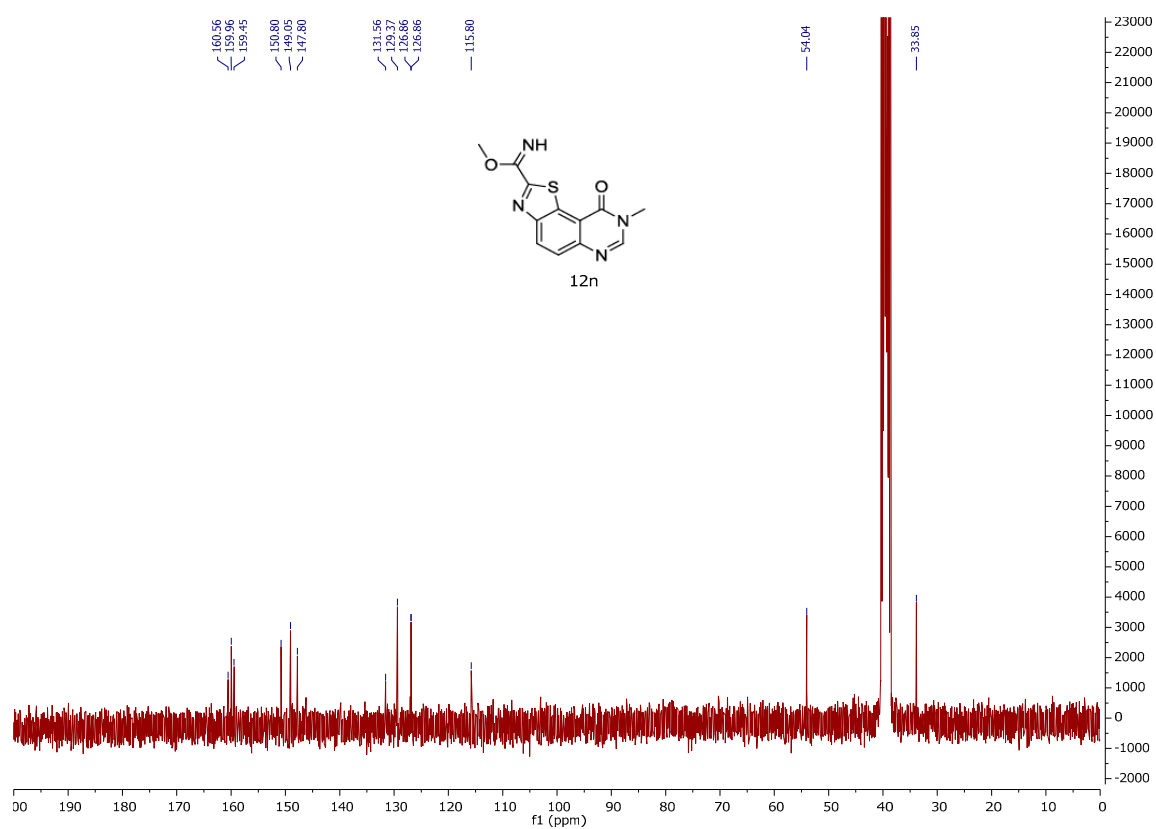Figure S49. <sup>13</sup>C-NMR Compound 12n.

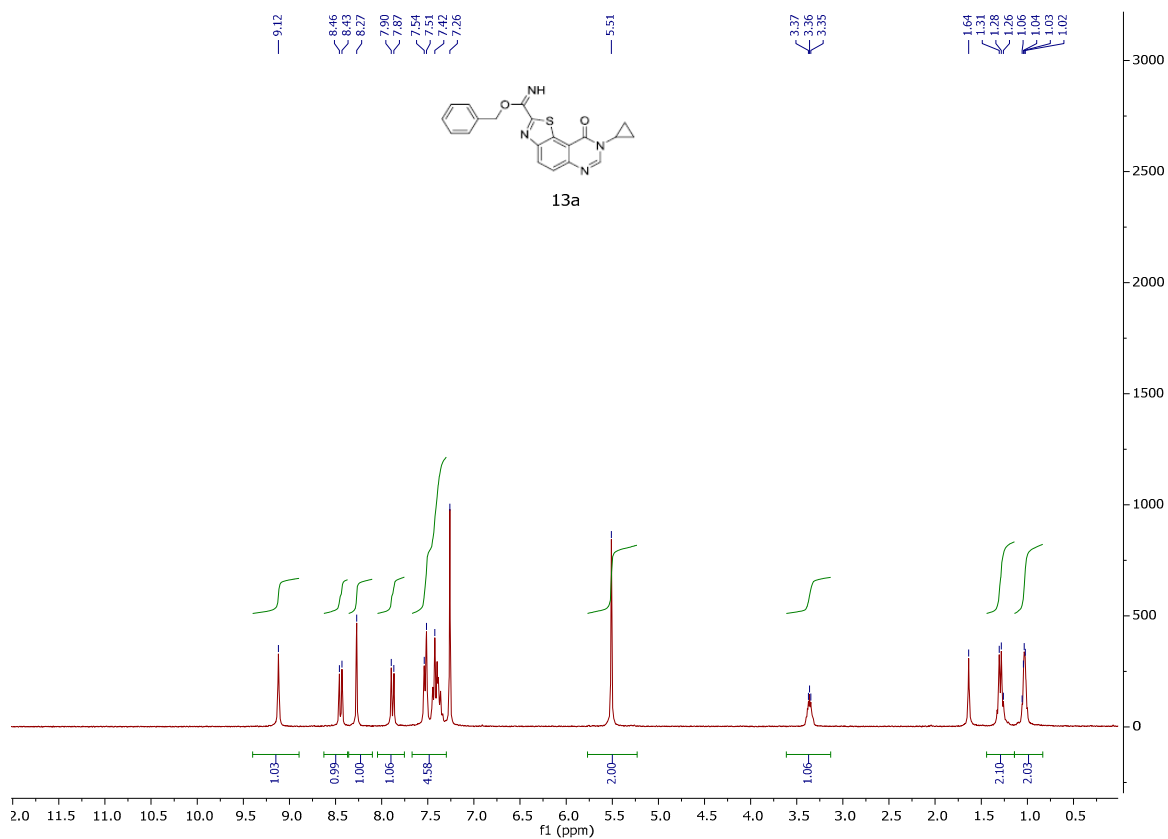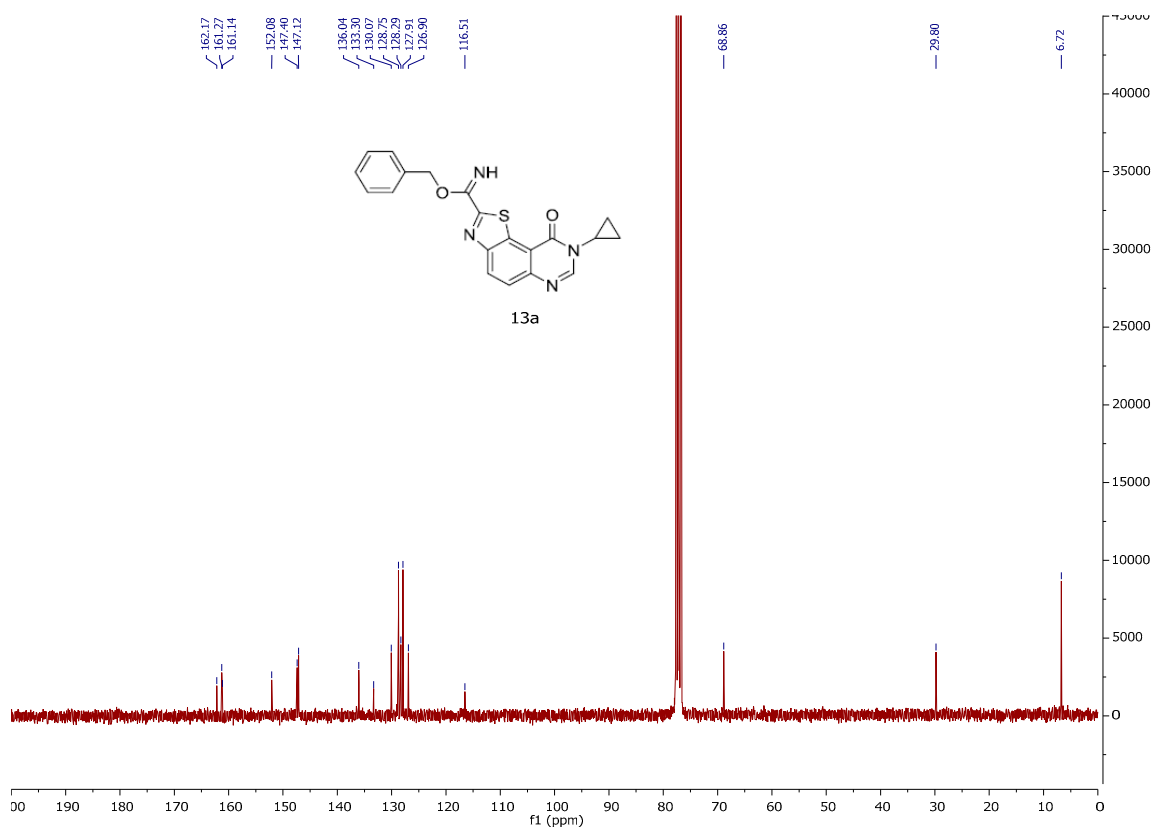

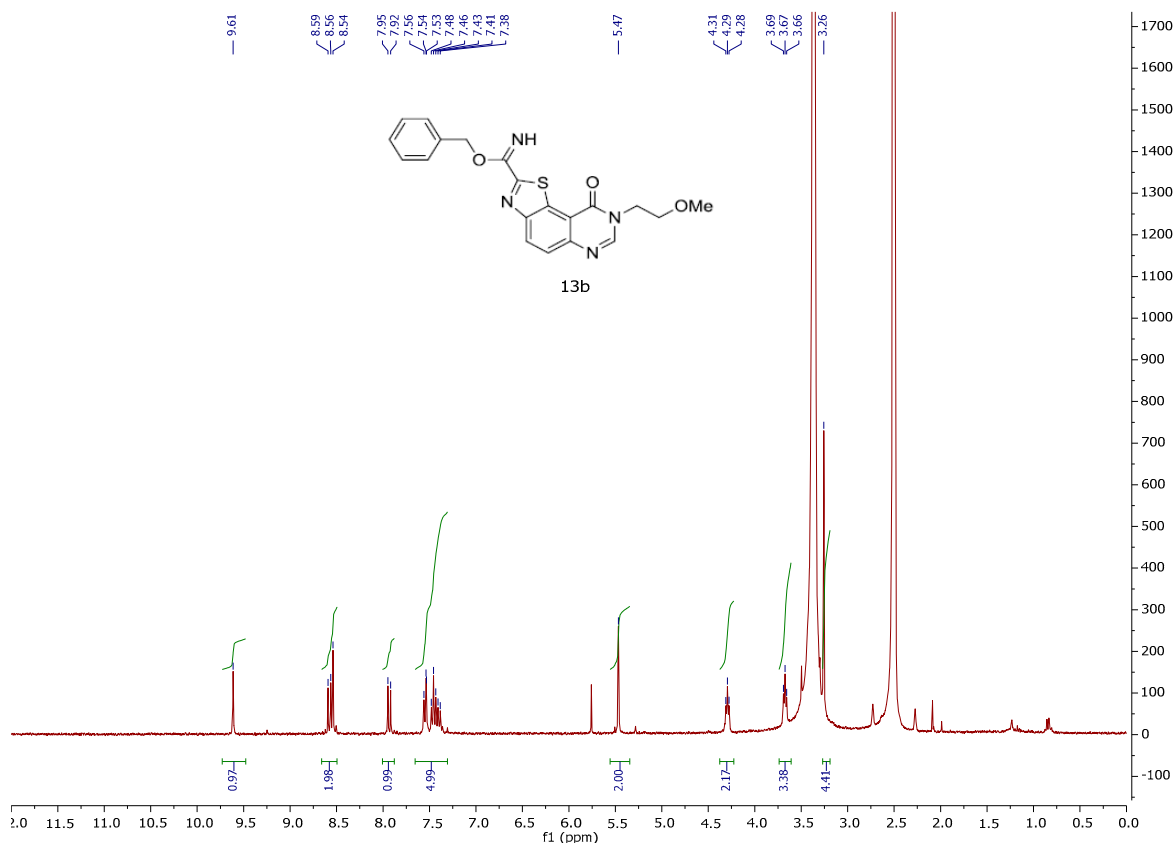Figure S52. <sup>1</sup>H-NMR Compound 13b.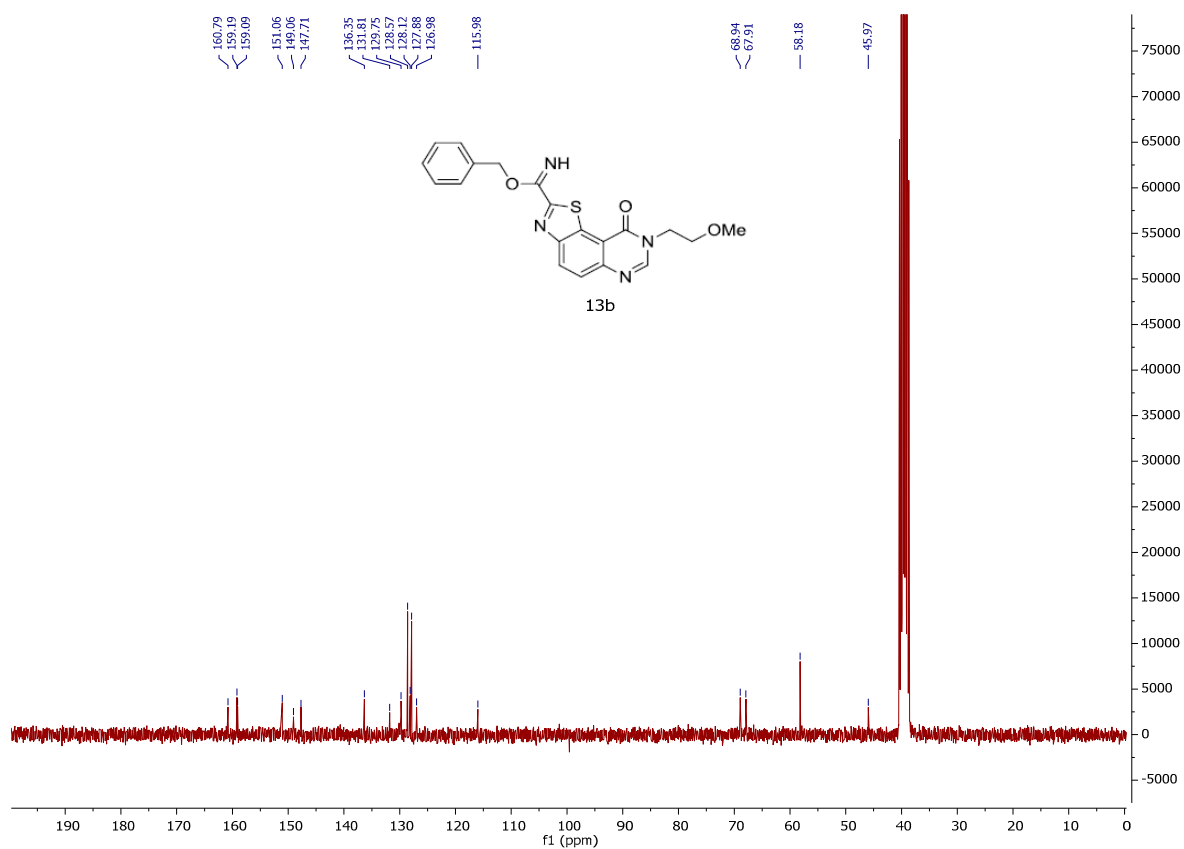Figure S53. <sup>13</sup>C-NMR Compound 13b.

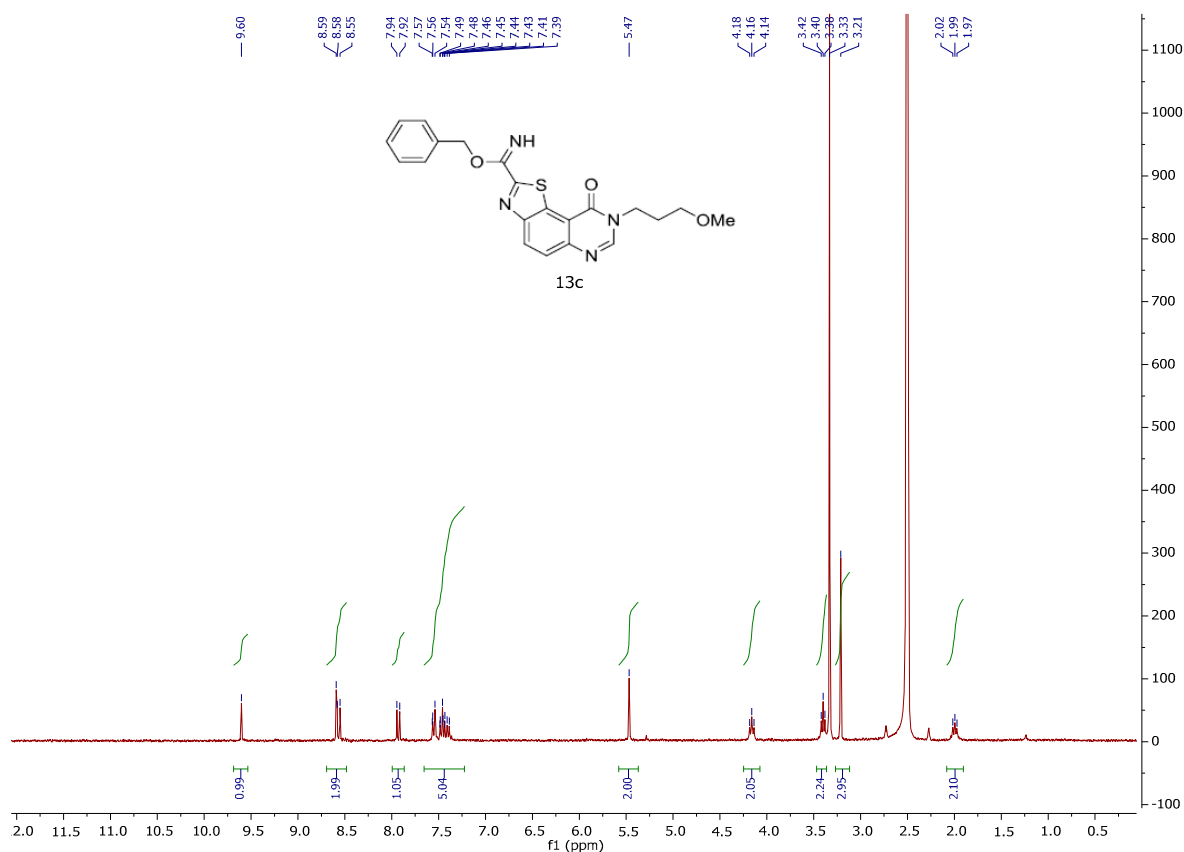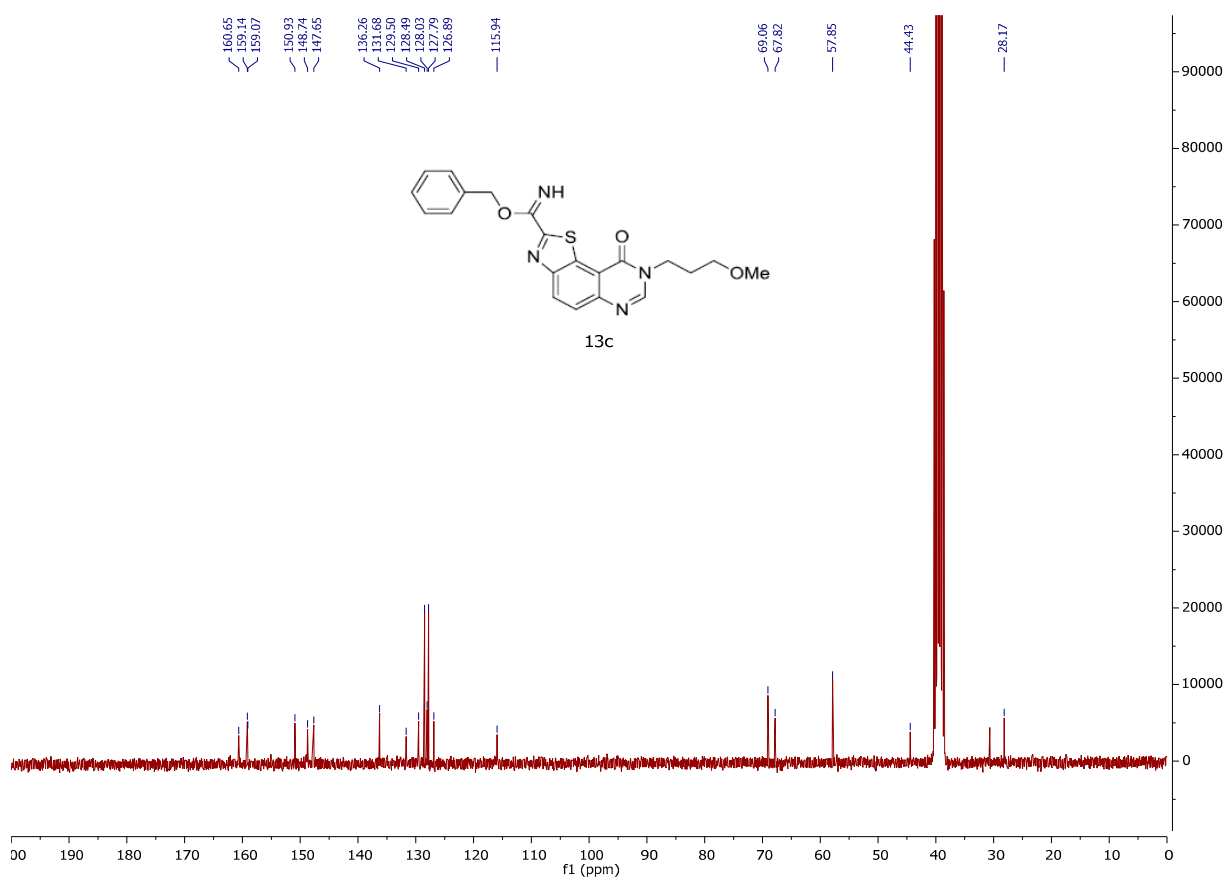



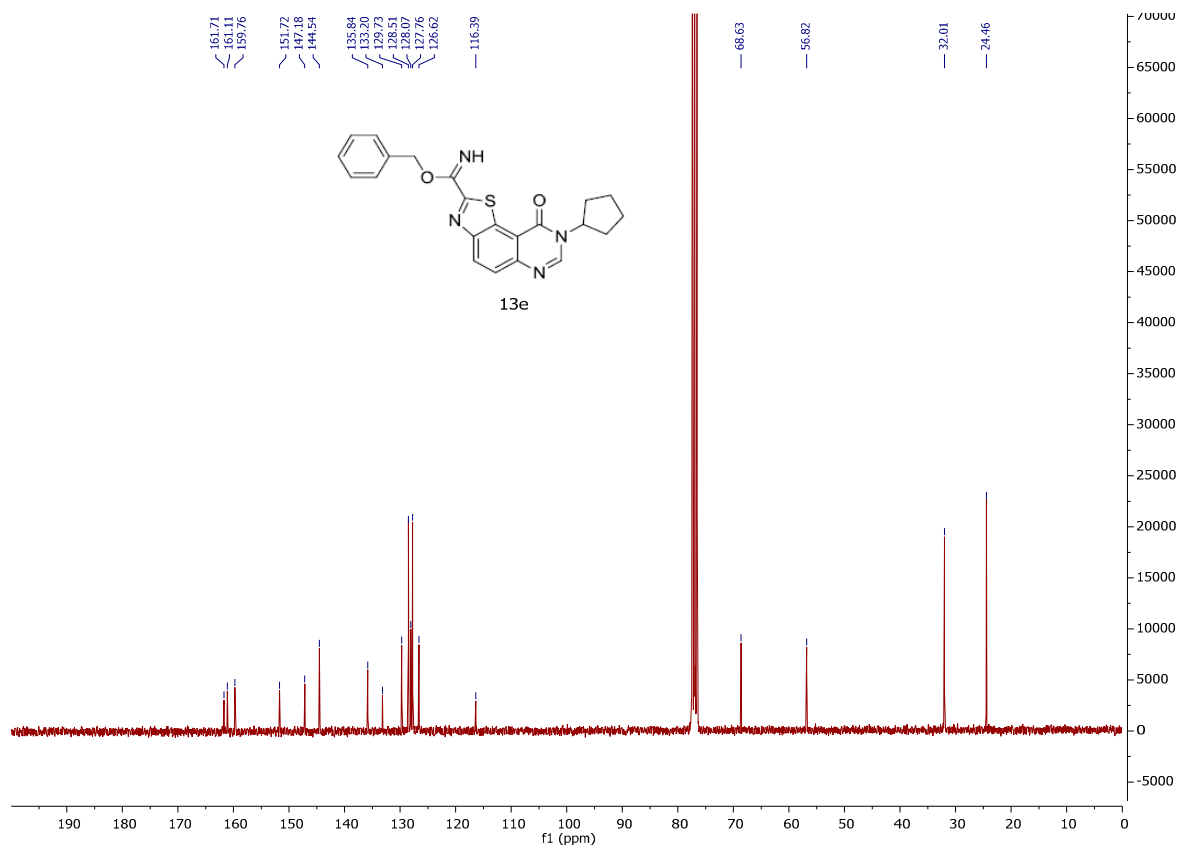Figure S58. <sup>13</sup>C-NMR Compound 13e.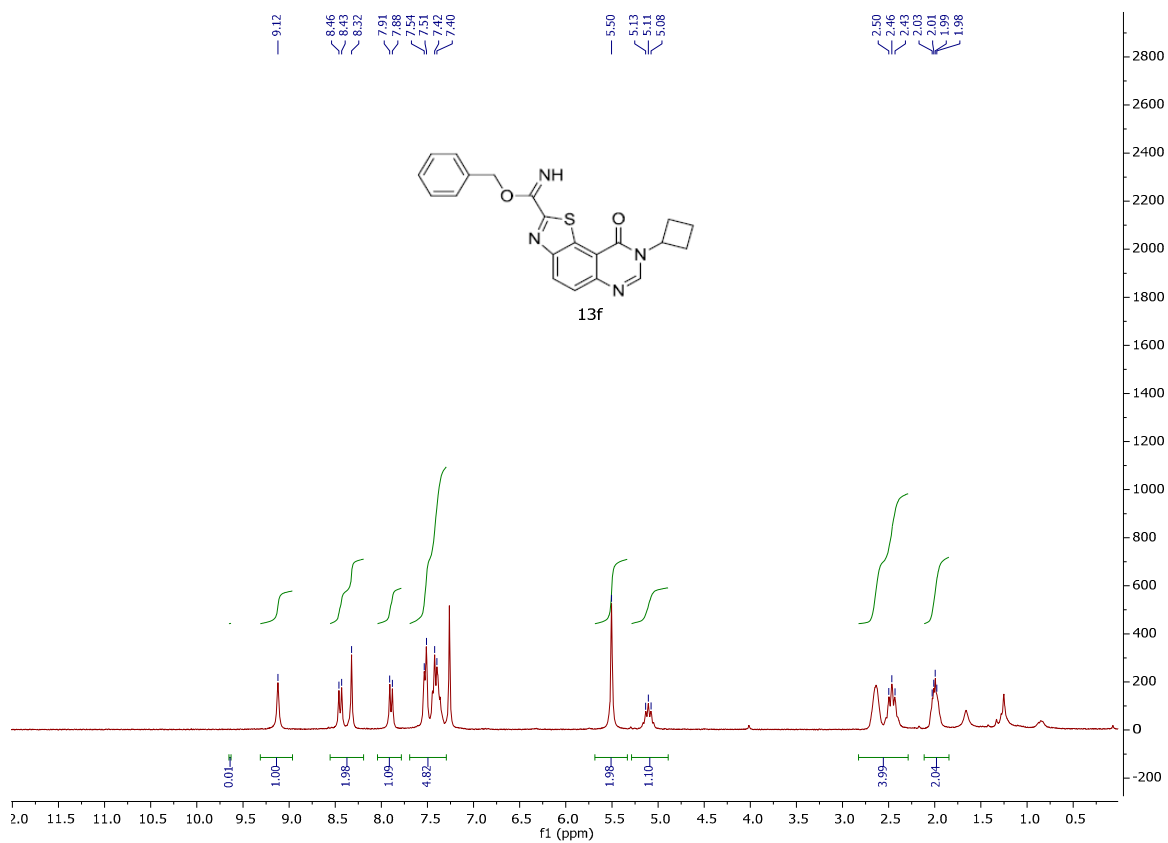Figure S59. <sup>1</sup>H-NMR Compound 13f.

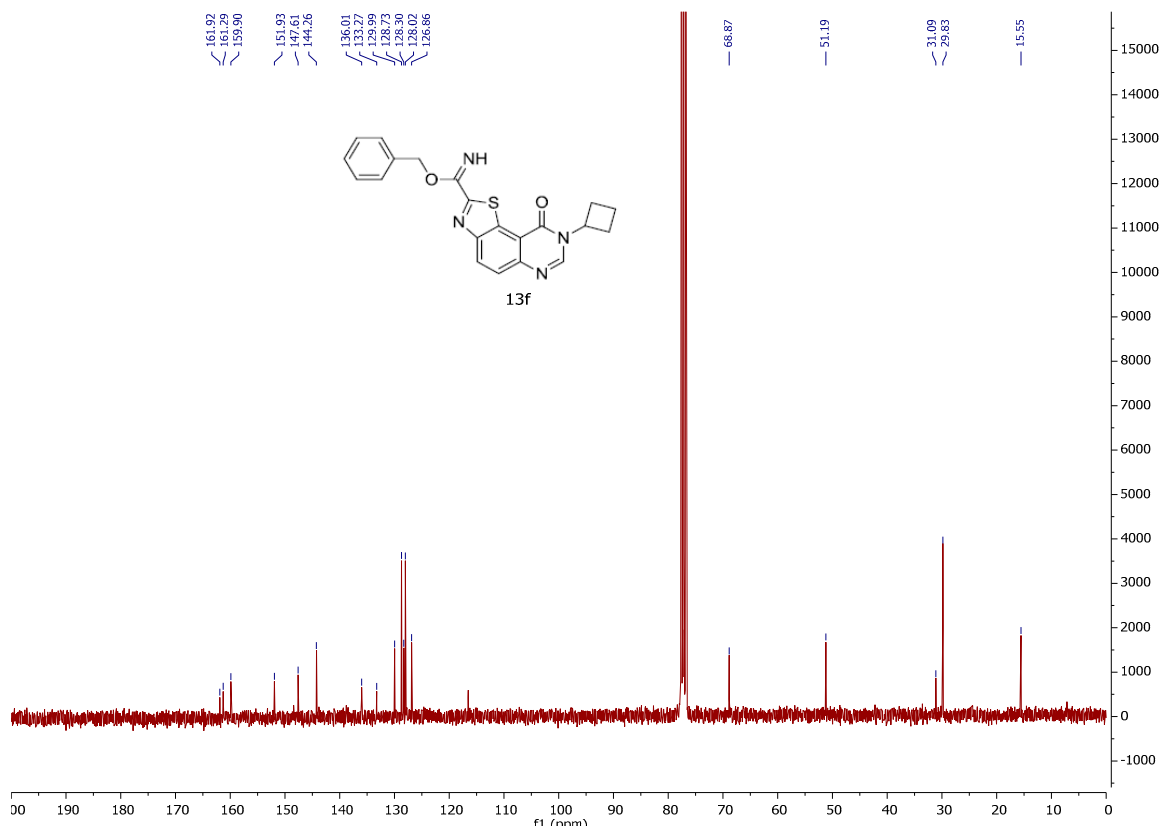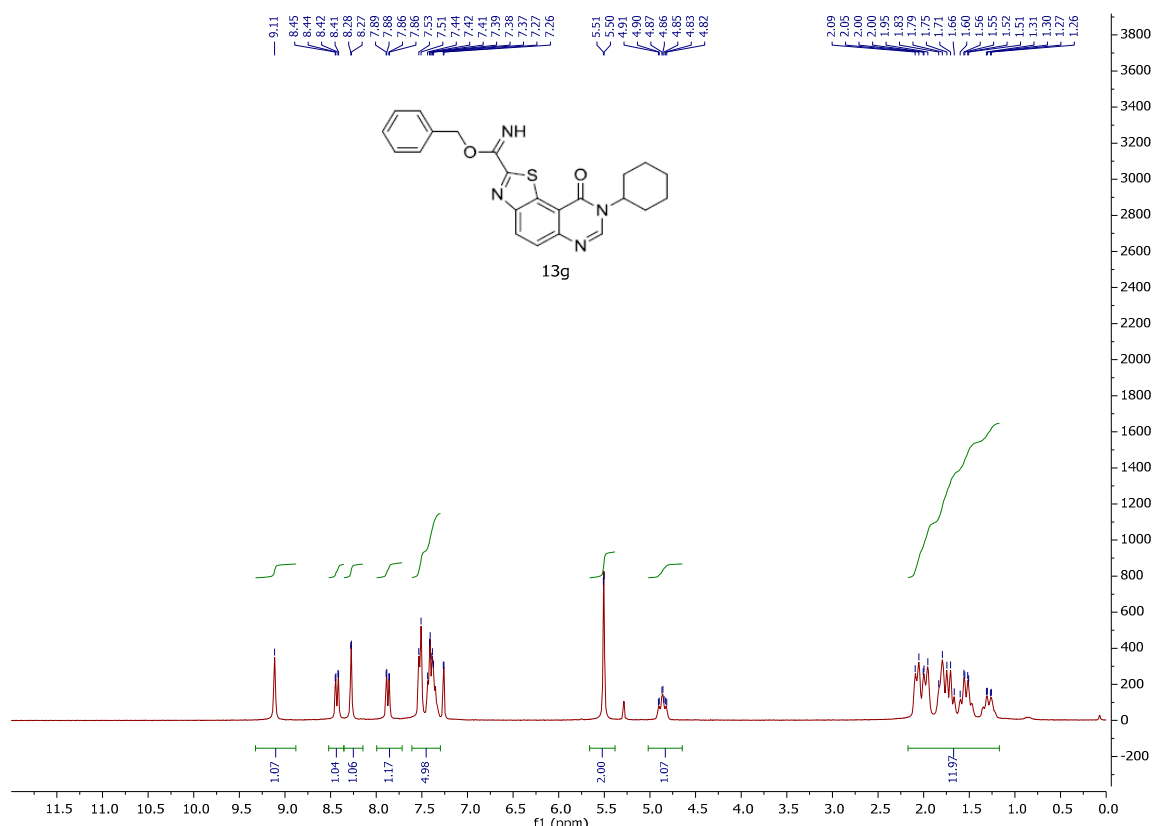

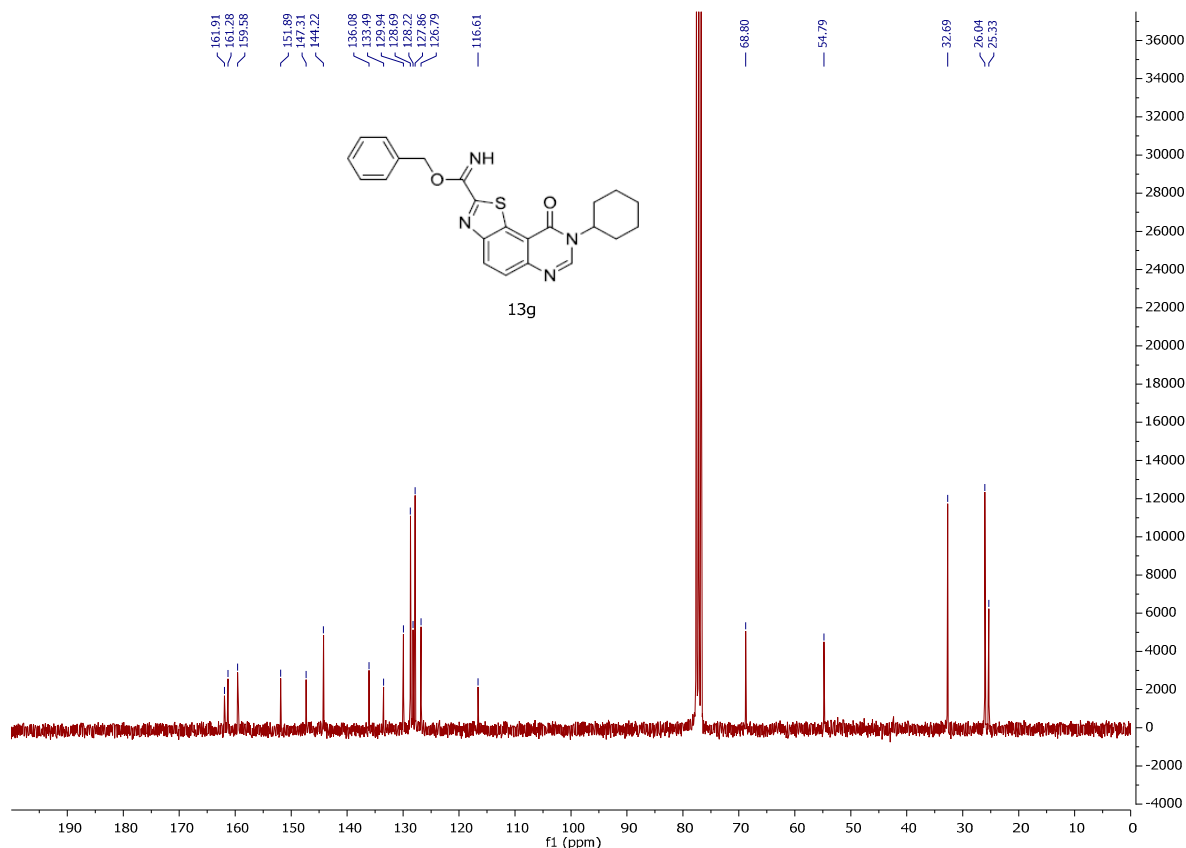Figure S62. <sup>13</sup>C-NMR Compound 13g.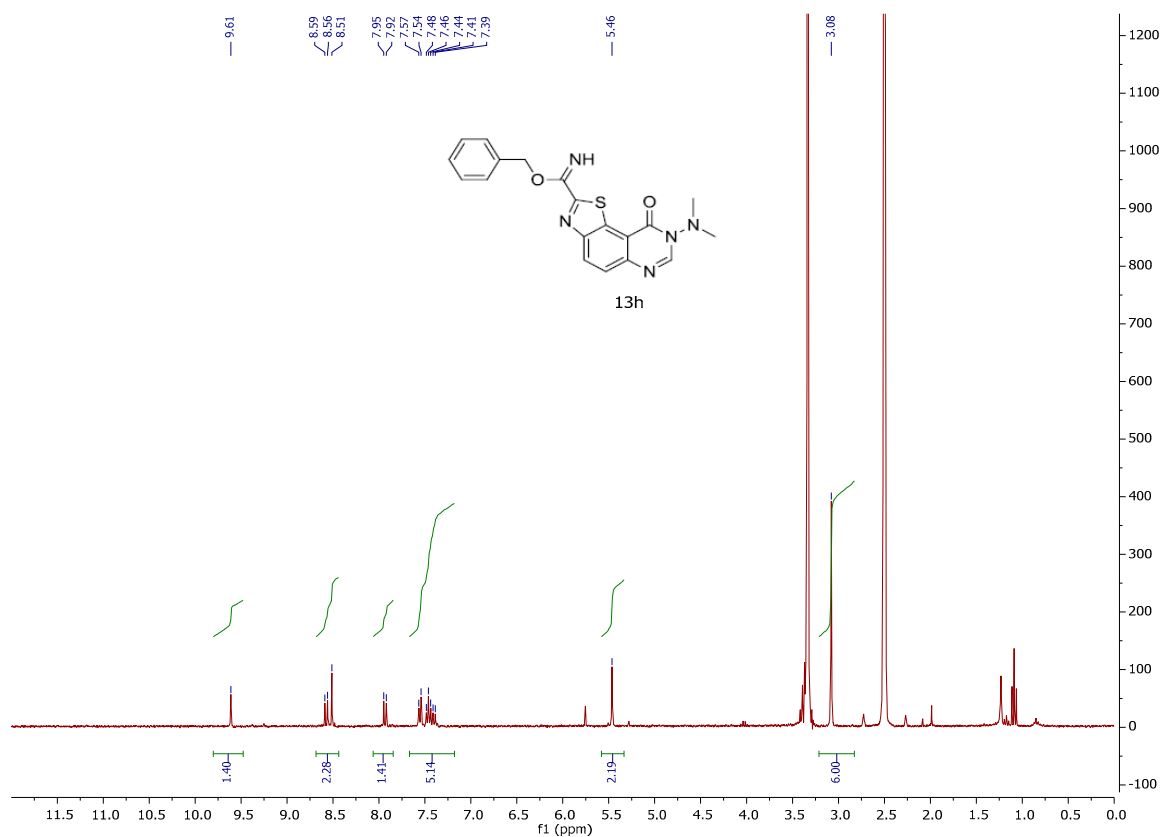Figure S63. <sup>1</sup>H-NMR Compound 13h.



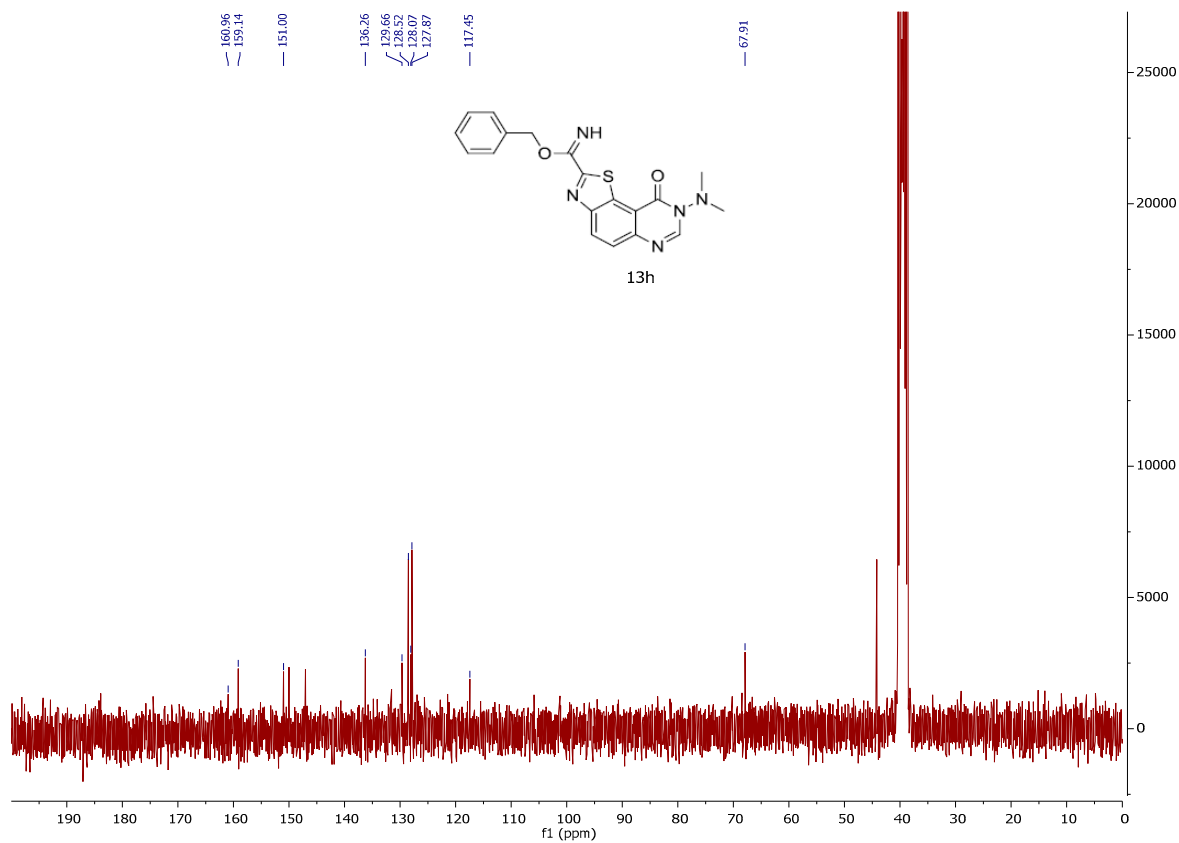Figure S64. <sup>13</sup>C-NMR Compound 13h.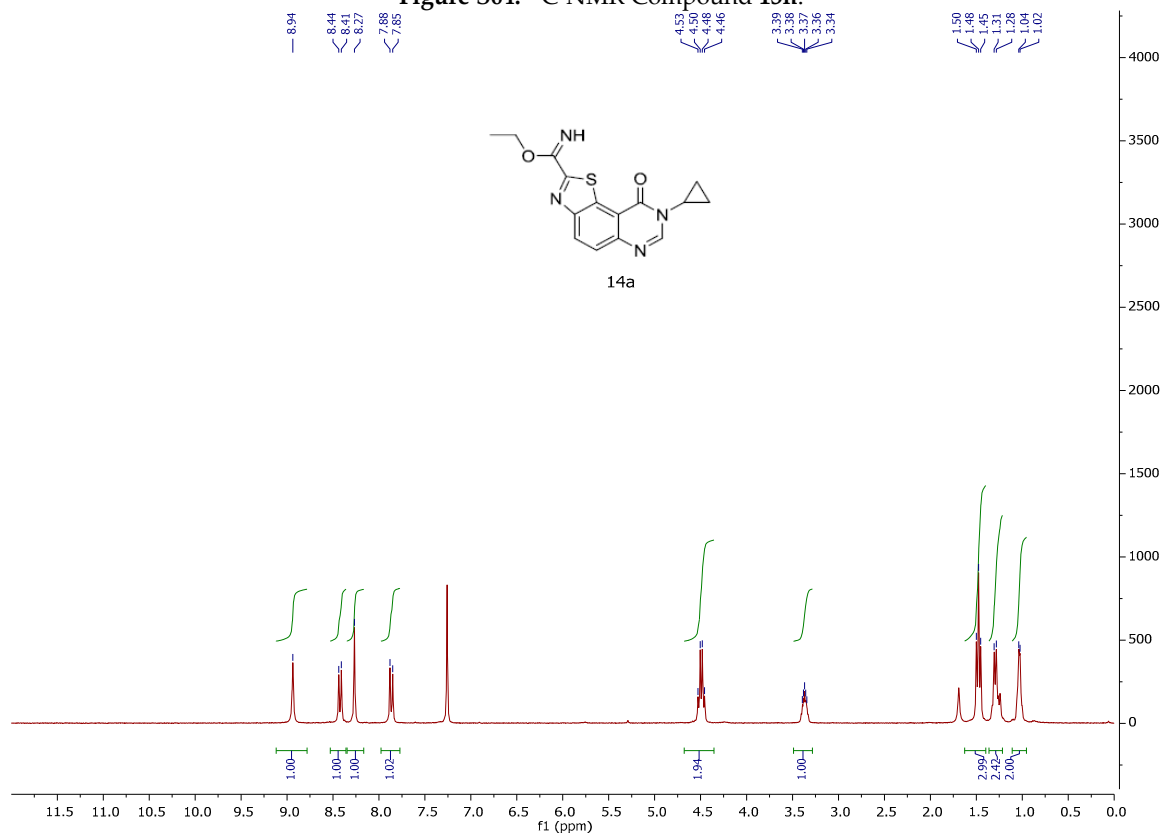Figure S65. <sup>1</sup>H-NMR Compound 14a.

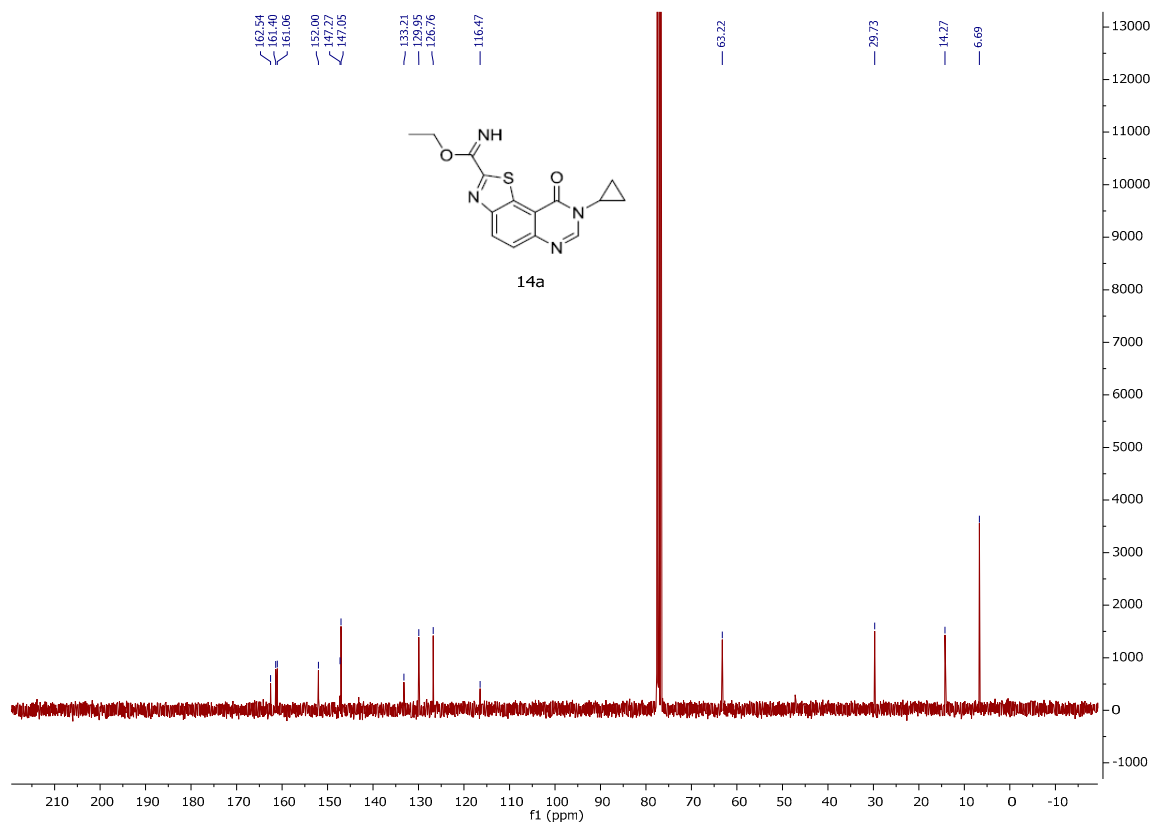Figure S66. <sup>13</sup>C-NMR Compound 14a.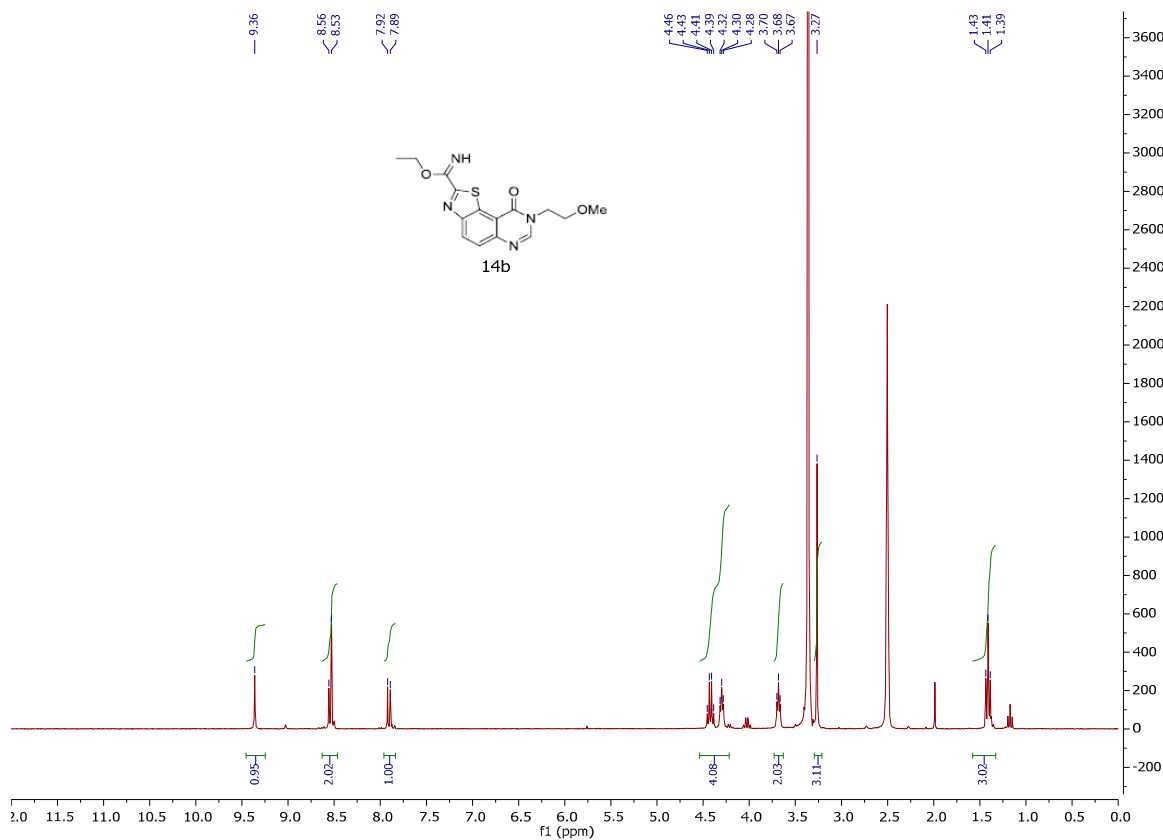Figure S67. <sup>1</sup>H-NMR Compound 14b.

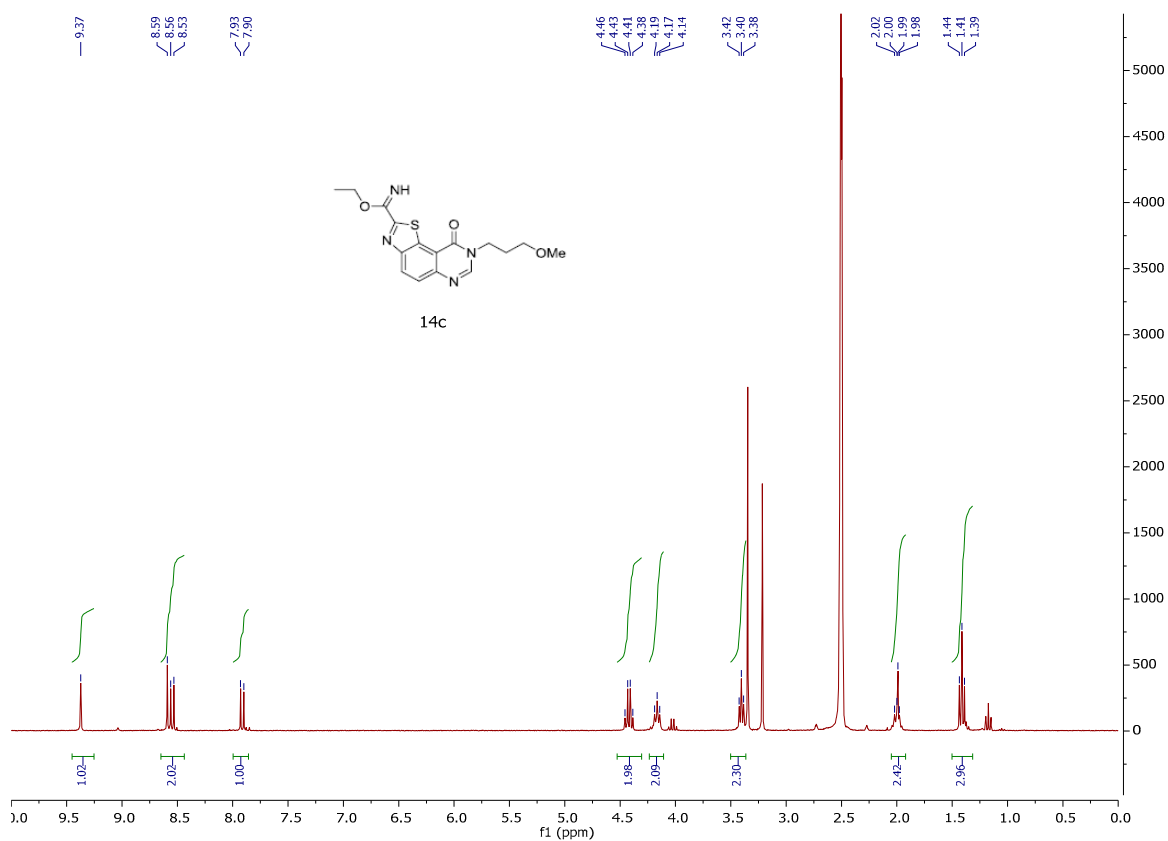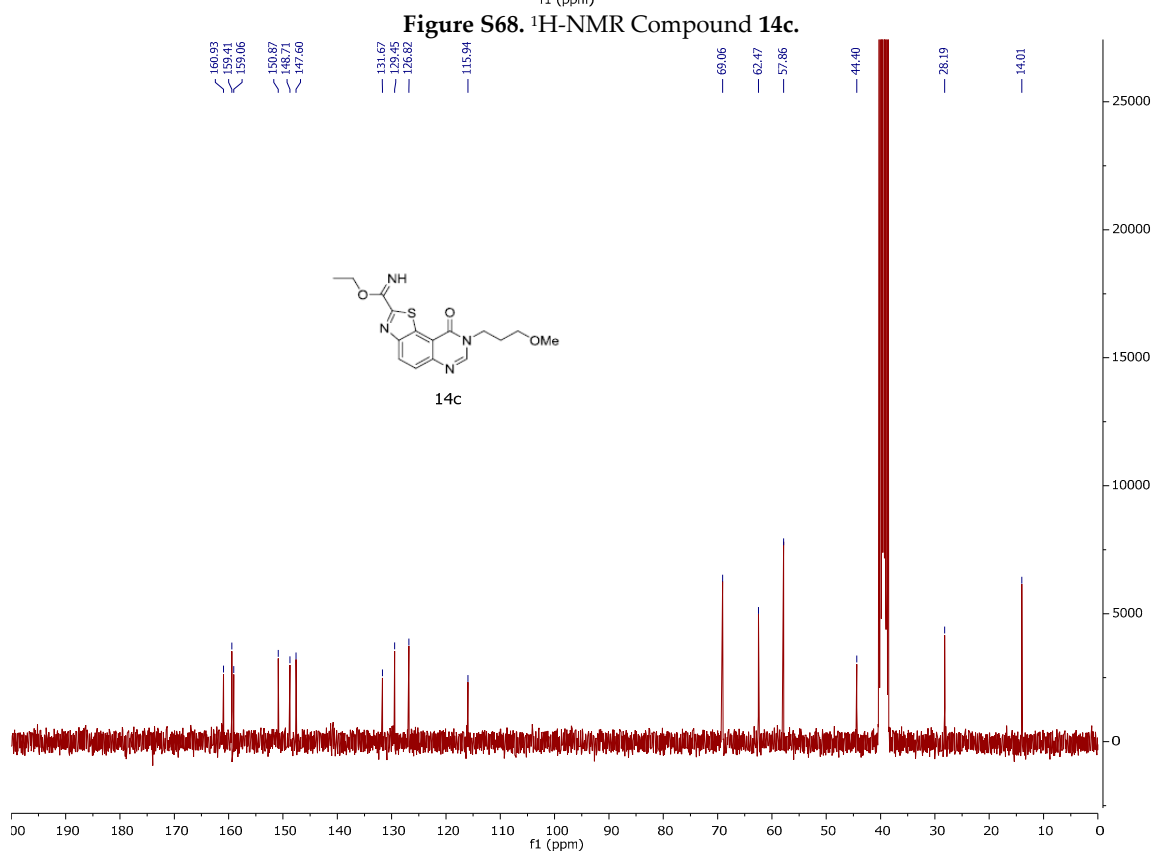

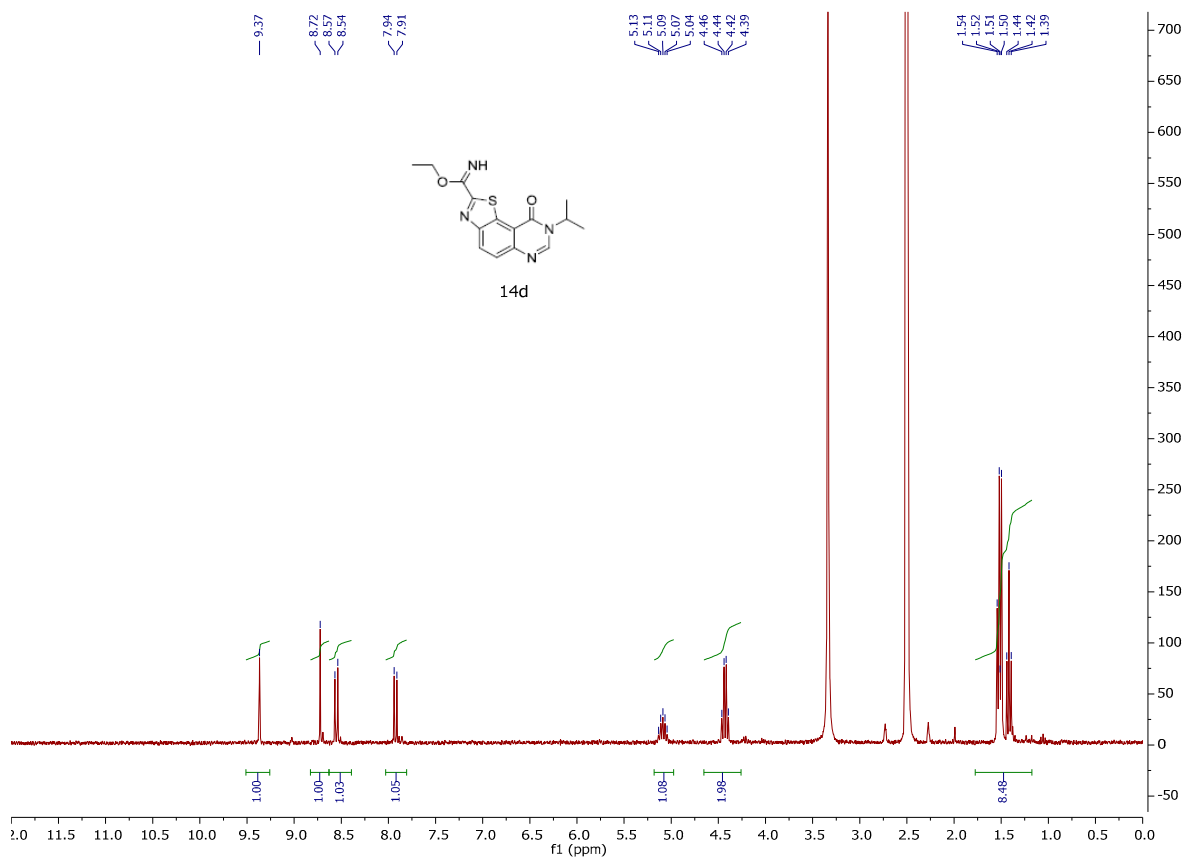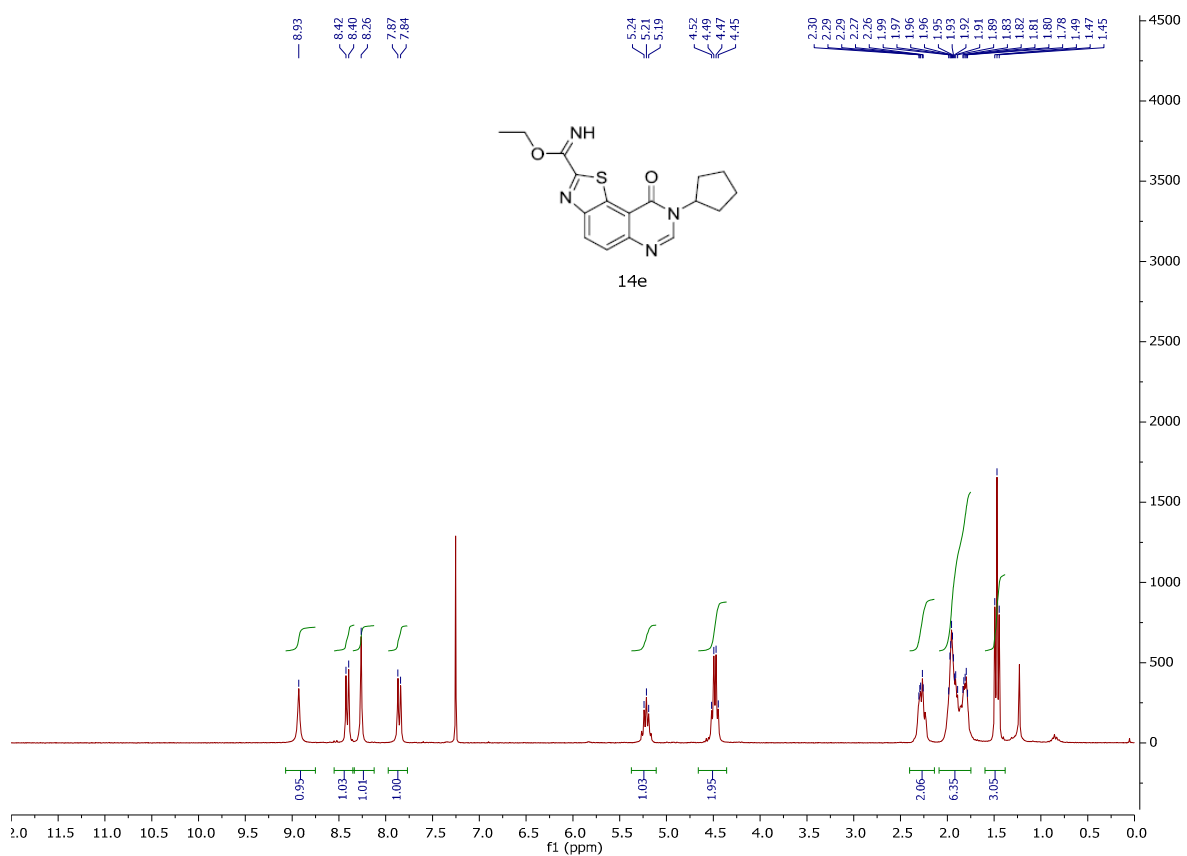

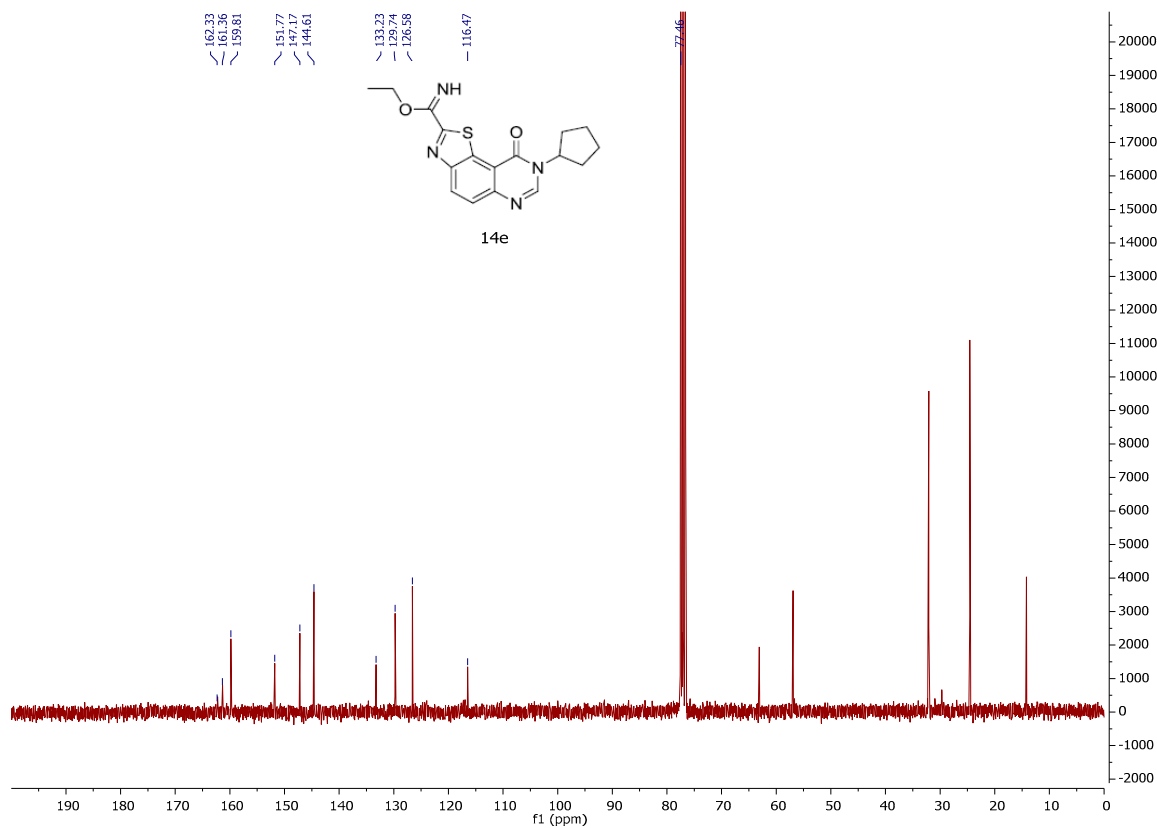Figure S72. <sup>13</sup>C-NMR Compound 14e.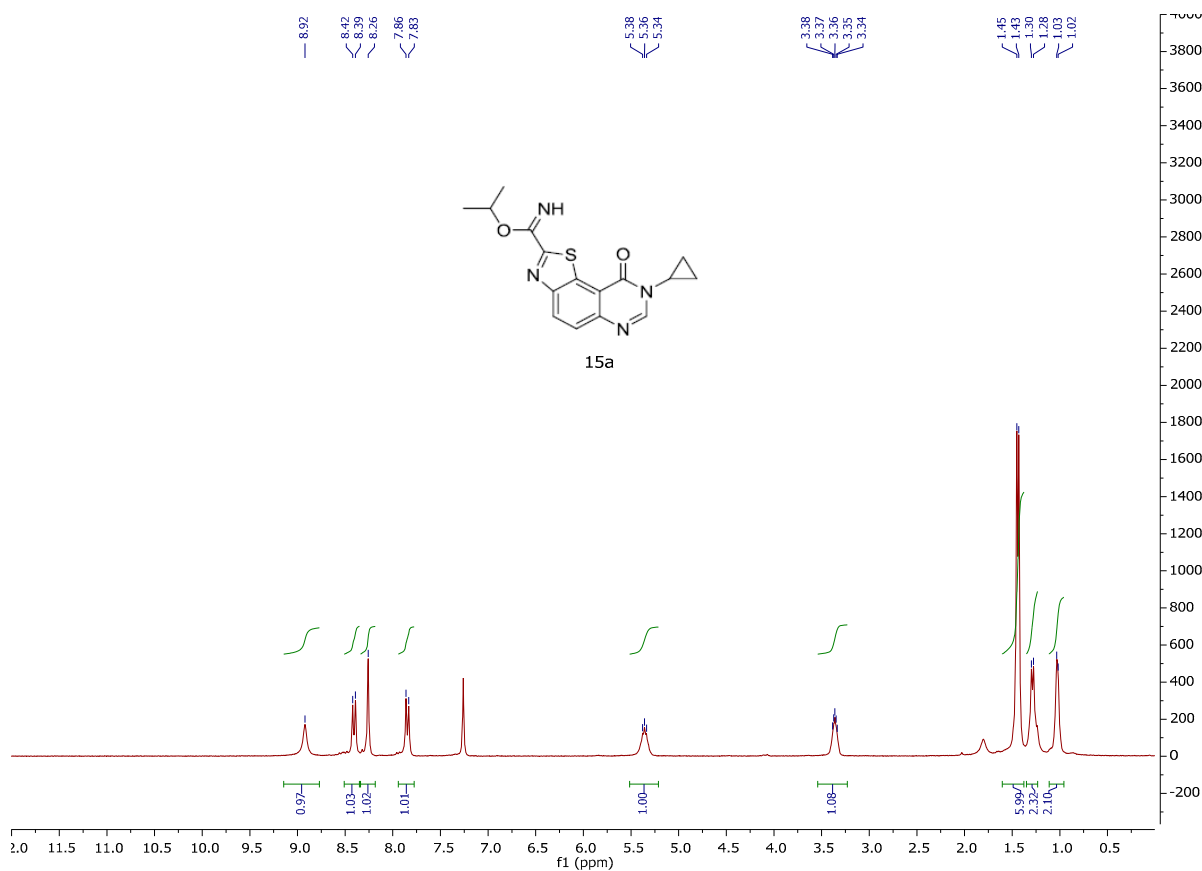Figure S73. <sup>1</sup>H-NMR Compound 15a.

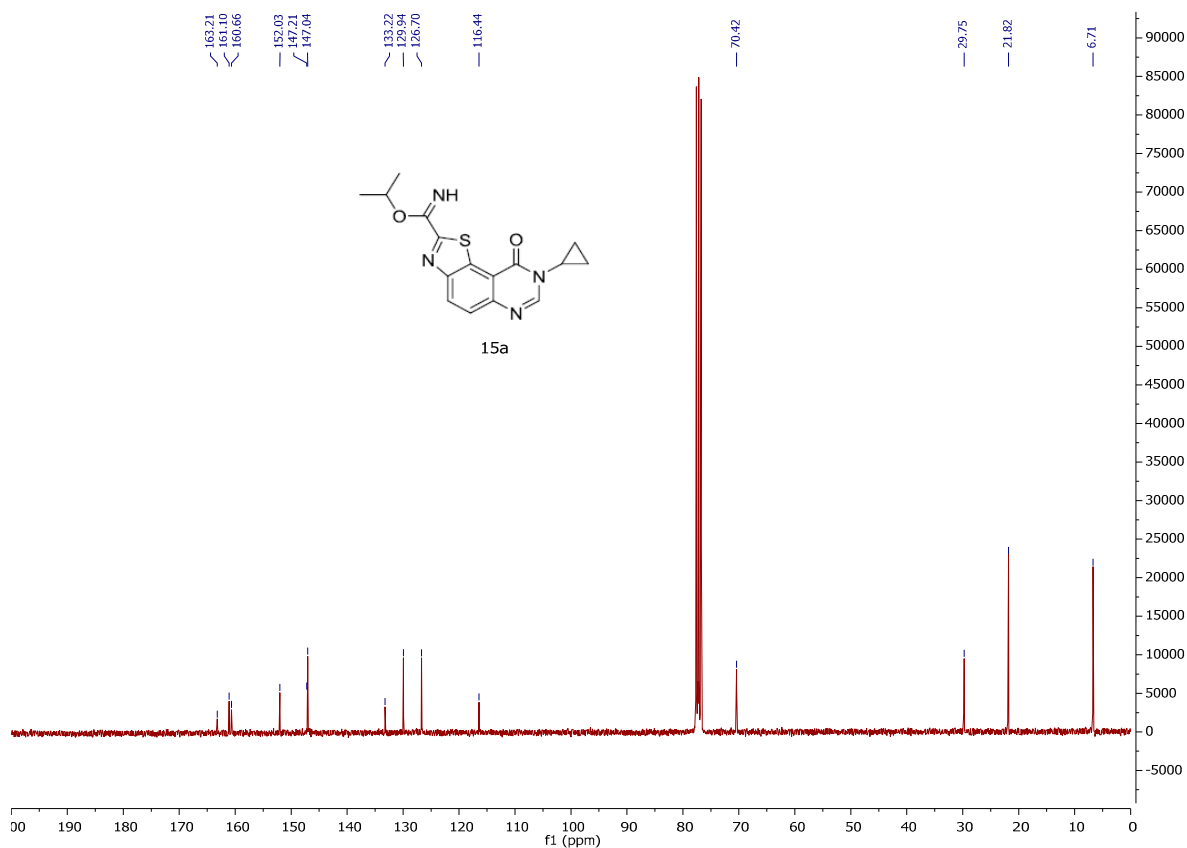Figure S74. <sup>13</sup>C-NMR Compound 15a.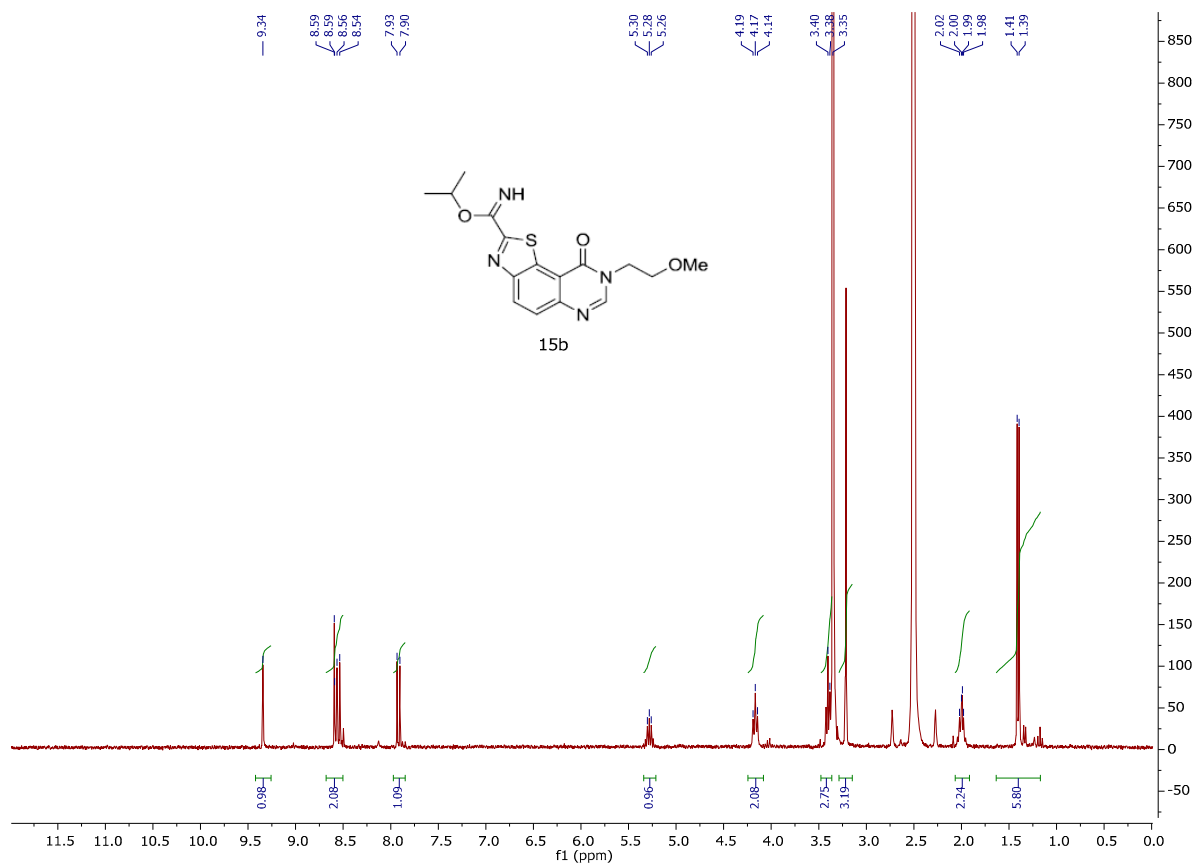Figure S75. <sup>1</sup>H-NMR Compound 15b.

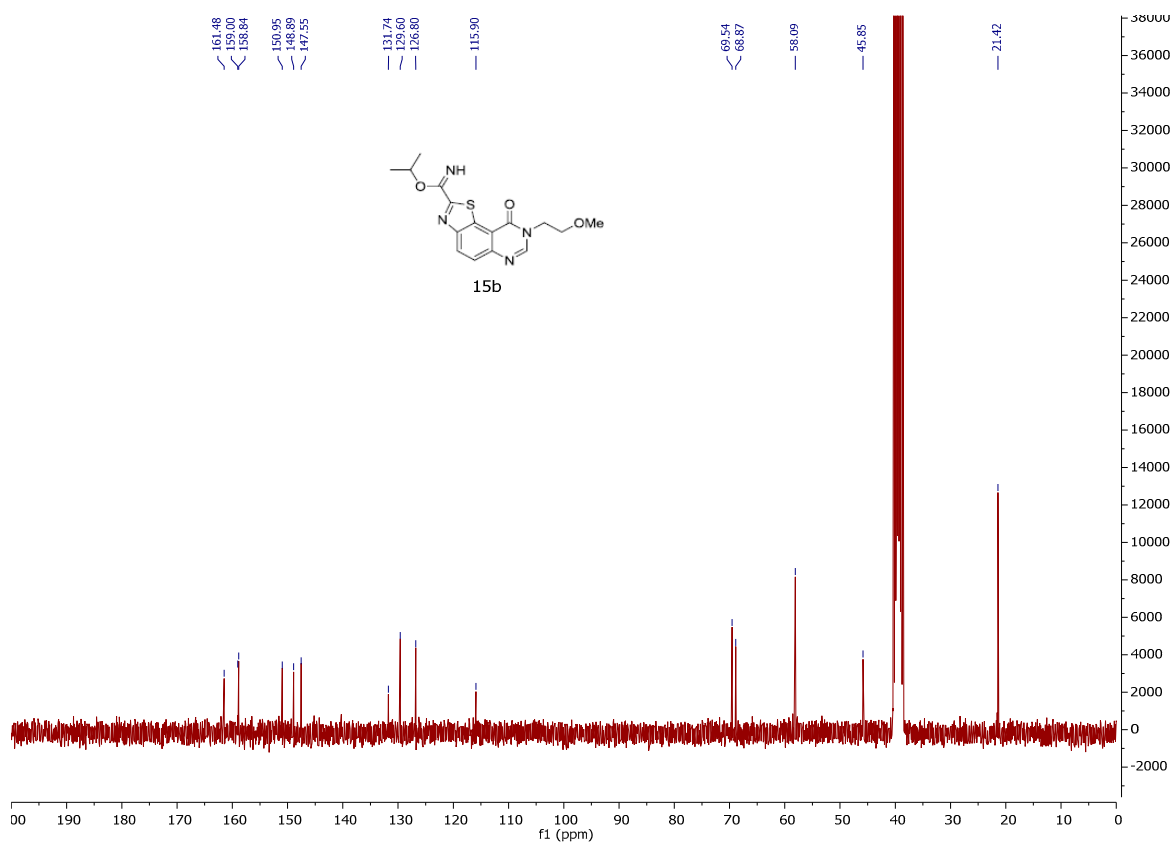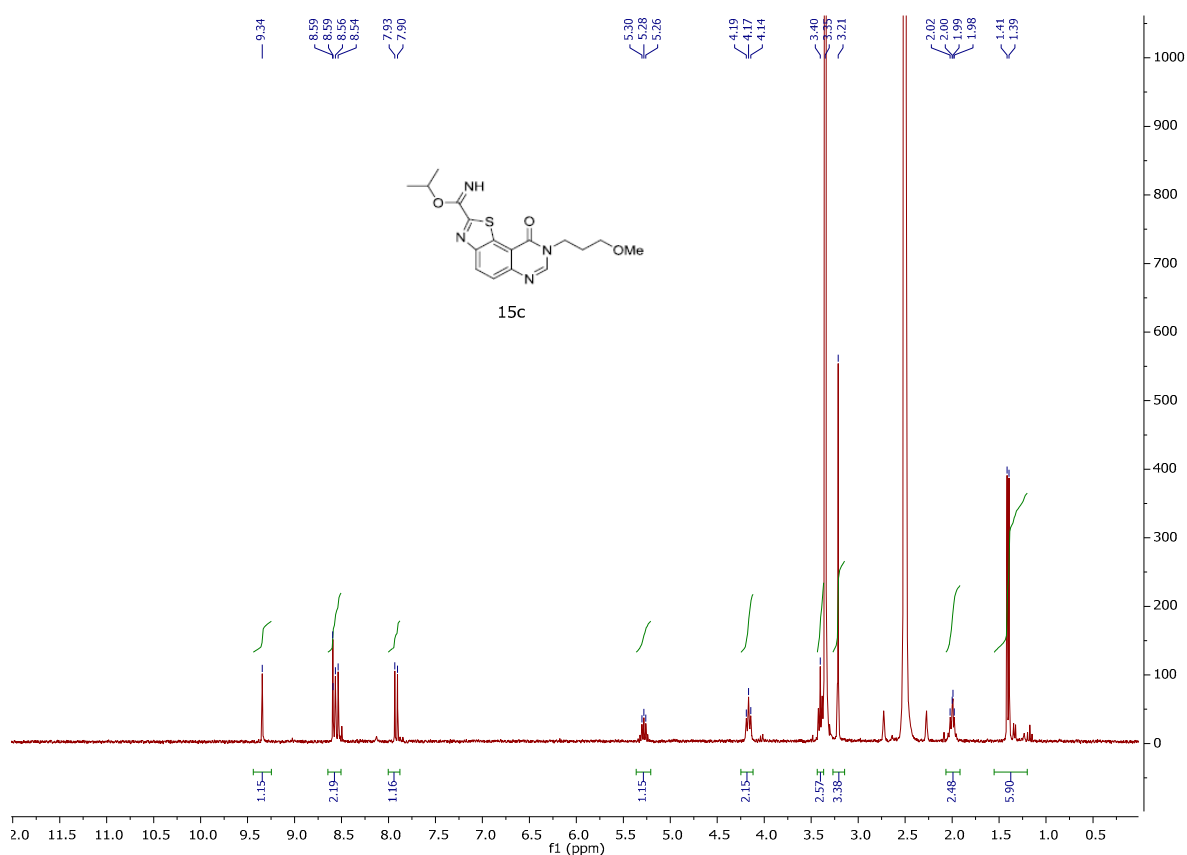

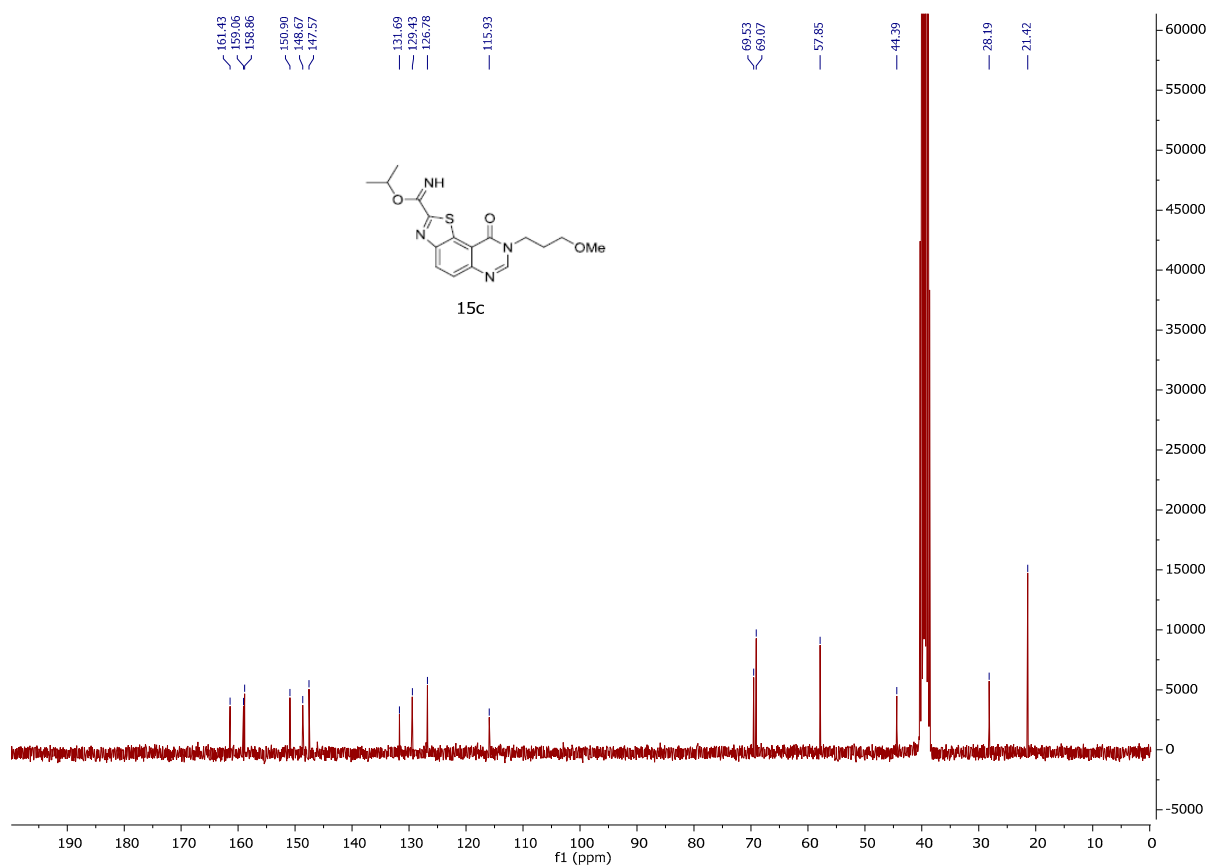Figure S80. <sup>13</sup>C-NMR Compound 15c.
